# Supplementary material for: Integrating microarray-based spatial transcriptomics and single-cell RNA-sequencing reveals tissue architecture in oesophageal squamous cell carcinoma
Source: Research Square preprint supplement (doi:10.21203/rs.3.rs-1539014/v1), 2022-04-14
Supplement: Supplementary file 1 [file 07b78afe3907f4ef26fdd2c7.xlsx]

## Sheet: NK_and_T_cells
Table S4 GSVA results of NK and T cell subsets.
Pathway	Name	CD4Exhausted	CD4Naive	CD4Proliferation	CD8Cytotoxic	CD8Exhausted	NKT	Others
R-HSA-166658	Complement cascade	0.0216407	0.0590431	0.0308598	0.0208934	0.0363405	0.0478741	0.0955159
R-HSA-166663	Initial triggering of complement	-0.0620251	0.019309	-0.0270838	-0.0758166	-0.0360768	-0.0194801	0.0305209
R-HSA-166786	Creation of C4 and C2 activators	-0.087569	0.0232704	-0.0127039	-0.137559	-0.0330154	-0.0295899	0.0195939
R-HSA-173623	Classical antibody-mediated complement activation	-0.0254104	0.108108	0.0756981	-0.105108	0.042995	0.0431772	0.0909007
R-HSA-198933	Immunoregulatory interactions between a Lymphoid and a non-Lymphoid cell	0.146328	0.147698	0.164811	0.148712	0.159532	0.165955	0.1571
R-HSA-202733	Cell surface interactions at the vascular wall	0.0867384	0.0895239	0.0835017	0.0877201	0.0889182	0.0909374	0.0983216
R-HSA-2029480	Fcgamma receptor (FCGR) dependent phagocytosis	0.112669	0.10661	0.103164	0.111695	0.111223	0.118679	0.11834
R-HSA-2029481	FCGR activation	0.115004	0.117628	0.124507	0.11088	0.120104	0.145996	0.153153
R-HSA-2029482	Regulation of actin dynamics for phagocytic cup formation	0.127376	0.1219	0.117013	0.125546	0.127121	0.132775	0.129272
R-HSA-2029485	Role of phospholipids in phagocytosis	0.0737957	0.0730212	0.0774952	0.0678524	0.0783	0.10189	0.117179
R-HSA-2168880	Scavenging of heme from plasma	0.0465387	0.0870993	0.0666529	0.0254585	0.0533838	0.0712188	0.11907
R-HSA-2173782	Binding and Uptake of Ligands by Scavenger Receptors	0.0946189	0.0942274	0.10041	0.0876438	0.0973131	0.0972692	0.108773
R-HSA-2730905	Role of LAT2/NTAL/LAB on calcium mobilization	0.12241	0.121217	0.114483	0.118607	0.118214	0.134298	0.157427
R-HSA-2871796	FCERI mediated MAPK activation	0.103784	0.101665	0.097867	0.102071	0.103353	0.105907	0.111656
R-HSA-2871809	FCERI mediated Ca+2 mobilization	0.0602368	0.0590117	0.0495798	0.0577188	0.0629304	0.0727881	0.0876882
R-HSA-2871837	FCERI mediated NF-kB activation	0.176005	0.173319	0.171435	0.171605	0.170884	0.173788	0.179391
R-HSA-5690714	CD22 mediated BCR regulation	0.0530551	0.0478537	0.0587557	0.0249642	0.0654945	0.0680368	0.0994581
R-HSA-977606	Regulation of Complement cascade	0.0417012	0.0773111	0.0530274	0.0360665	0.0576734	0.0665767	0.110325
R-HSA-983695	Antigen activates B Cell Receptor (BCR) leading to generation of second messengers	0.0955384	0.0888031	0.0856349	0.0902523	0.0917583	0.105415	0.111067
R-HSA-983705	Signaling by the B Cell Receptor (BCR)	0.153376	0.148917	0.147795	0.150307	0.14973	0.154903	0.157134
R-HSA-9013106	RHOC GTPase cycle	0.0836287	0.0754916	0.084495	0.0782153	0.0748578	0.0857662	0.0950399
R-HSA-202403	TCR signaling	0.158197	0.153121	0.150017	0.15731	0.156077	0.157922	0.156647
R-HSA-202424	Downstream TCR signaling	0.176404	0.171451	0.168751	0.172795	0.171855	0.171534	0.172636
R-HSA-202427	Phosphorylation of CD3 and TCR zeta chains	0.239807	0.215587	0.22149	0.226324	0.235773	0.230032	0.211923
R-HSA-202430	Translocation of ZAP-70 to Immunological synapse	0.303455	0.280999	0.2911	0.28778	0.303543	0.281259	0.269669
R-HSA-202433	Generation of second messenger molecules	0.121966	0.111123	0.114542	0.127224	0.13371	0.131114	0.119733
R-HSA-388841	Costimulation by the CD28 family	0.133166	0.126318	0.126572	0.132396	0.127867	0.128063	0.127251
R-HSA-389948	PD-1 signaling	0.157017	0.125318	0.138293	0.135616	0.15846	0.133774	0.14631
R-HSA-6805567	Keratinization	0.0429986	0.0490107	0.0460028	0.0426893	0.051429	0.0476082	0.060887
R-HSA-6809371	Formation of the cornified envelope	0.0365997	0.0448543	0.0414498	0.0374648	0.0459827	0.0435393	0.0618271
R-HSA-5620924	Intraflagellar transport	0.115202	0.121539	0.13367	0.120574	0.115798	0.113452	0.119044
R-HSA-8852135	Protein ubiquitination	0.155554	0.155035	0.162742	0.154435	0.154496	0.15034	0.150453
R-HSA-8866654	E3 ubiquitin ligases ubiquitinate target proteins	0.155466	0.152076	0.164023	0.151311	0.154075	0.146328	0.15144
R-HSA-6791312	TP53 Regulates Transcription of Cell Cycle Genes	0.143067	0.135871	0.176343	0.141484	0.141206	0.143877	0.141987
R-HSA-6804116	TP53 Regulates Transcription of Genes Involved in G1 Cell Cycle Arrest	0.122521	0.114034	0.15709	0.11901	0.120406	0.126029	0.128636
R-HSA-8866652	Synthesis of active ubiquitin: roles of E1 and E2 enzymes	0.195776	0.200221	0.190235	0.198954	0.192093	0.197623	0.190987
R-HSA-1660662	Glycosphingolipid metabolism	0.0625044	0.0622509	0.0382611	0.0558112	0.0466313	0.0838491	0.11683
R-HSA-428157	Sphingolipid metabolism	0.0415037	0.0481092	0.030484	0.0365866	0.0457178	0.0521384	0.0846129
R-HSA-1989781	PPARA activates gene expression	0.0985899	0.102378	0.0978753	0.10411	0.0955275	0.0968722	0.0980346
R-HSA-381340	Transcriptional regulation of white adipocyte differentiation	0.127014	0.129786	0.125916	0.130991	0.126946	0.127357	0.13225
R-HSA-400206	Regulation of lipid metabolism by PPARalpha	0.100421	0.104032	0.0998511	0.106048	0.0974564	0.0985945	0.10027
R-HSA-9696270	RND2 GTPase cycle	0.0691773	0.0597321	0.0558874	0.0622987	0.0584109	0.0730273	0.0872415
R-HSA-373760	L1CAM interactions	0.12949	0.125295	0.13181	0.128277	0.129573	0.129866	0.134562
R-HSA-437239	Recycling pathway of L1	0.154514	0.14775	0.15931	0.158132	0.156747	0.154502	0.157095
R-HSA-189200	Cellular hexose transport	0.0400235	0.0276378	0.0449749	0.031412	0.0599047	0.0177604	0.0737336
R-HSA-425407	SLC-mediated transmembrane transport	0.0417659	0.0435711	0.0339339	0.040295	0.0422148	0.0457627	0.0598253
R-HSA-169911	Regulation of Apoptosis	0.192221	0.188622	0.196263	0.187542	0.191308	0.186437	0.185483
R-HSA-211728	Regulation of PAK-2p34 activity by PS-GAP/RHG10	0.110694	0.0717049	0.108252	0.107376	0.107332	0.102385	0.106336
R-HSA-8980692	RHOA GTPase cycle	0.0927517	0.0850257	0.0866591	0.0870005	0.0829189	0.0929495	0.0988654
R-HSA-9013148	CDC42 GTPase cycle	0.0938589	0.0816177	0.0866327	0.0853139	0.0850237	0.0875301	0.0888974
R-HSA-9013149	RAC1 GTPase cycle	0.1019	0.0971627	0.0949528	0.100545	0.095376	0.102119	0.104897
R-HSA-2672351	Stimuli-sensing channels	0.143571	0.142602	0.133002	0.142922	0.145339	0.138853	0.138489
R-HSA-983712	Ion channel transport	0.124837	0.120595	0.112155	0.122498	0.129339	0.121761	0.122835
R-HSA-977225	Amyloid fiber formation	0.133797	0.134352	0.136425	0.134971	0.132502	0.131183	0.13749
R-HSA-193648	NRAGE signals death through JNK	0.107334	0.10031	0.0949125	0.100316	0.103518	0.104565	0.0984062
R-HSA-193704	p75 NTR receptor-mediated signalling	0.144146	0.138879	0.134622	0.138896	0.13792	0.143495	0.140231
R-HSA-204998	Cell death signalling via NRAGE, NRIF and NADE	0.132669	0.124921	0.120042	0.121541	0.124668	0.125357	0.122351
R-HSA-416482	G alpha (12/13) signalling events	0.0997384	0.0851194	0.0883169	0.0830538	0.0907651	0.0903108	0.0805437
R-HSA-1221632	Meiotic synapsis	0.118586	0.119428	0.150474	0.116863	0.11622	0.115706	0.114447
R-HSA-1474165	Reproduction	0.10321	0.103077	0.140279	0.102795	0.103337	0.101887	0.0989581
R-HSA-1500620	Meiosis	0.109461	0.110239	0.150053	0.109318	0.109091	0.107049	0.102968
R-HSA-9013406	RHOQ GTPase cycle	0.107966	0.105962	0.106078	0.106506	0.108337	0.109801	0.113117
R-HSA-9013408	RHOG GTPase cycle	0.127617	0.12092	0.11939	0.120332	0.118914	0.126169	0.127076
R-HSA-75105	Fatty acyl-CoA biosynthesis	0.0388976	0.0471875	0.0362368	0.0356701	0.0410914	0.0478504	0.0840868
R-HSA-75876	Synthesis of very long-chain fatty acyl-CoAs	0.0599086	0.0499117	0.0503798	0.0427092	0.0545621	0.0508039	0.0974599
R-HSA-8978868	Fatty acid metabolism	0.0425951	0.0415377	0.0365124	0.0354909	0.038976	0.0474623	0.0660079
R-HSA-3000471	Scavenging by Class B Receptors	0.0863705	0.105751	0.0943139	0.0854549	0.0846731	0.0944652	0.112671
R-HSA-6811434	COPI-dependent Golgi-to-ER retrograde traffic	0.0842843	0.0833945	0.112267	0.0824236	0.0825664	0.0786614	0.0851536
R-HSA-6811442	Intra-Golgi and retrograde Golgi-to-ER traffic	0.104279	0.104181	0.112865	0.104844	0.102463	0.10065	0.105245
R-HSA-8856688	Golgi-to-ER retrograde transport	0.102248	0.102567	0.124078	0.102987	0.101844	0.0986203	0.103675
R-HSA-71064	Lysine catabolism	0.0787337	0.0841664	0.128838	0.0993326	0.10536	0.118345	0.0784125
R-HSA-71291	Metabolism of amino acids and derivatives	0.149313	0.149404	0.157674	0.141537	0.14809	0.143127	0.14439
R-HSA-6782315	tRNA modification in the nucleus and cytosol	0.0661708	0.0689094	0.0684304	0.0516969	0.0594502	0.0475627	0.0388735
R-HSA-6782861	Synthesis of wybutosine at G37 of tRNA(Phe)	0.0164037	0.016681	0.021092	0.0229272	0.0265751	-0.0141009	-0.0150726
R-HSA-72306	tRNA processing	0.110321	0.114401	0.132707	0.108296	0.109719	0.0994176	0.0924367
R-HSA-8876198	RAB GEFs exchange GTP for GDP on RABs	0.133313	0.142128	0.12099	0.143981	0.127059	0.14474	0.132479
R-HSA-9007101	Rab regulation of trafficking	0.12249	0.129193	0.113275	0.129401	0.118841	0.132229	0.123588
R-HSA-446193	Biosynthesis of the N-glycan precursor (dolichol lipid-linked oligosaccharide, LLO) and transfer to a nascent protein	0.033311	0.0529275	0.0341188	0.0407587	0.037684	0.0469208	0.047747
R-HSA-446219	Synthesis of substrates in N-glycan biosythesis	0.0404444	0.0546269	0.0400148	0.0443896	0.0439372	0.0517231	0.0516271
R-HSA-6787639	GDP-fucose biosynthesis	0.000931555	-0.0227739	0.0097421	-0.0385858	-0.0157485	-0.036871	-0.0621699
R-HSA-5173105	O-linked glycosylation	-0.093966	-0.0897126	-0.101165	-0.0727696	-0.0748601	-0.0576036	-0.0633633
R-HSA-5173214	O-glycosylation of TSR domain-containing proteins	-0.233077	-0.181497	-0.23561	-0.174244	-0.209115	-0.168172	-0.203824
R-HSA-381753	Olfactory Signaling Pathway	0.0379124	0.0526138	0.0353628	0.0416867	0.0444601	0.0577234	0.0680757
R-HSA-9709957	Sensory Perception	0.0625852	0.0704404	0.0545595	0.0635165	0.0644661	0.0694688	0.0792829
R-HSA-8873719	RAB geranylgeranylation	0.0898115	0.096458	0.0860375	0.0987573	0.0847087	0.0993992	0.089342
R-HSA-5685942	HDR through Homologous Recombination (HRR)	0.11732	0.114971	0.145346	0.113502	0.116514	0.112041	0.108744
R-HSA-5693537	Resolution of D-Loop Structures	0.0846294	0.0827748	0.114981	0.0836795	0.0831898	0.0823184	0.0738152
R-HSA-5693538	Homology Directed Repair	0.118386	0.113841	0.142169	0.114498	0.116199	0.109434	0.109077
R-HSA-5693567	HDR through Homologous Recombination (HRR) or Single Strand Annealing (SSA)	0.120505	0.115841	0.143927	0.116234	0.117592	0.110894	0.111314
R-HSA-5693568	Resolution of D-loop Structures through Holliday Junction Intermediates	0.0859438	0.0840874	0.116308	0.085124	0.0845736	0.0837445	0.0754273
R-HSA-6783310	Fanconi Anemia Pathway	0.125186	0.120778	0.13981	0.124117	0.129068	0.124837	0.114407
R-HSA-9659379	Sensory processing of sound	0.0809888	0.0883792	0.0760492	0.0848136	0.0844003	0.0872914	0.0945836
R-HSA-9662360	Sensory processing of sound by inner hair cells of the cochlea	0.075093	0.0830584	0.0710139	0.0797429	0.0835654	0.0828893	0.0812769
R-HSA-9662361	Sensory processing of sound by outer hair cells of the cochlea	0.0906956	0.0952199	0.0888872	0.0959024	0.0903341	0.0979288	0.104537
R-HSA-8964572	Lipid particle organization	0.0284844	0.0330316	0.0328805	0.0239341	0.0390399	0.0409847	0.0602334
R-HSA-917729	Endosomal Sorting Complex Required For Transport (ESCRT)	0.120472	0.124243	0.122152	0.122931	0.121548	0.119826	0.121177
R-HSA-9615710	Late endosomal microautophagy	0.14178	0.14255	0.139148	0.140915	0.138123	0.137726	0.144971
R-HSA-1168372	Downstream signaling events of B Cell Receptor (BCR)	0.18456	0.182164	0.180656	0.183844	0.181014	0.182955	0.182076
R-HSA-1169091	Activation of NF-kappaB in B cells	0.183178	0.181205	0.181433	0.182989	0.181445	0.182101	0.179961
R-HSA-1234174	Cellular response to hypoxia	0.184041	0.179308	0.182159	0.17543	0.178706	0.181912	0.181399
R-HSA-1234176	Oxygen-dependent proline hydroxylation of Hypoxia-inducible Factor Alpha	0.189018	0.185699	0.187805	0.18135	0.184674	0.187772	0.186766
R-HSA-1236974	ER-Phagosome pathway	0.158329	0.160365	0.160405	0.15378	0.155018	0.159094	0.16
R-HSA-1236975	Antigen processing-Cross presentation	0.152511	0.153902	0.153317	0.147012	0.148625	0.15243	0.15471
R-HSA-1236978	Cross-presentation of soluble exogenous antigens (endosomes)	0.180342	0.180083	0.19197	0.173583	0.181873	0.178156	0.176366
R-HSA-174113	SCF-beta-TrCP mediated degradation of Emi1	0.175153	0.172178	0.191055	0.171658	0.176867	0.169949	0.165141
R-HSA-174143	APC/C-mediated degradation of cell cycle proteins	0.153111	0.149483	0.191238	0.152112	0.154413	0.148364	0.144127
R-HSA-174154	APC/C:Cdc20 mediated degradation of Securin	0.179665	0.179362	0.204766	0.175516	0.181159	0.174585	0.175256
R-HSA-174178	APC/C:Cdh1 mediated degradation of Cdc20 and other APC/C:Cdh1 targeted proteins in late mitosis/early G1	0.164385	0.162008	0.207043	0.16283	0.164849	0.159099	0.157282
R-HSA-174184	Cdc20:Phospho-APC/C mediated degradation of Cyclin A	0.173045	0.169192	0.211967	0.16749	0.174584	0.166124	0.169261
R-HSA-176408	Regulation of APC/C activators between G1/S and early anaphase	0.154484	0.150207	0.18976	0.151536	0.156426	0.148296	0.145265
R-HSA-176409	APC/C:Cdc20 mediated degradation of mitotic proteins	0.16915	0.16564	0.20823	0.163969	0.170705	0.162307	0.165781
R-HSA-176814	Activation of APC/C and APC/C:Cdc20 mediated degradation of mitotic proteins	0.160116	0.156756	0.202945	0.156315	0.161636	0.152242	0.154471
R-HSA-179419	APC:Cdc20 mediated degradation of cell cycle proteins prior to satisfation of the cell cycle checkpoint	0.171742	0.167923	0.210602	0.166298	0.173122	0.16447	0.168164
R-HSA-195253	Degradation of beta-catenin by the destruction complex	0.144523	0.145835	0.140838	0.150254	0.142777	0.147547	0.136096
R-HSA-211733	Regulation of activated PAK-2p34 by proteasome mediated degradation	0.196912	0.193289	0.201035	0.191771	0.196175	0.19101	0.190212
R-HSA-2467813	Separation of Sister Chromatids	0.157823	0.155495	0.200196	0.157342	0.159239	0.149755	0.14981
R-HSA-2555396	Mitotic Metaphase and Anaphase	0.15917	0.158485	0.194636	0.160883	0.16024	0.15304	0.152164
R-HSA-349425	Autodegradation of the E3 ubiquitin ligase COP1	0.182972	0.179913	0.189217	0.178789	0.17982	0.182702	0.179171
R-HSA-350562	Regulation of ornithine decarboxylase (ODC)	0.189906	0.192686	0.201542	0.184345	0.193301	0.188681	0.190117
R-HSA-351202	Metabolism of polyamines	0.179708	0.180215	0.193438	0.173687	0.182876	0.178231	0.177029
R-HSA-382556	ABC-family proteins mediated transport	0.17632	0.175962	0.175603	0.171381	0.17329	0.168705	0.177637
R-HSA-3858494	Beta-catenin independent WNT signaling	0.147108	0.146774	0.141444	0.146086	0.142186	0.145282	0.144976
R-HSA-4086400	PCP/CE pathway	0.153933	0.153904	0.149322	0.151093	0.150163	0.15208	0.151952
R-HSA-450408	AUF1 (hnRNP D0) binds and destabilizes mRNA	0.193418	0.19159	0.189368	0.190531	0.190395	0.188258	0.187195
R-HSA-450531	Regulation of mRNA stability by proteins that bind AU-rich elements	0.174552	0.172825	0.172053	0.173051	0.16986	0.169719	0.170261
R-HSA-453276	Regulation of mitotic cell cycle	0.153111	0.149483	0.191238	0.152112	0.154413	0.148364	0.144127
R-HSA-4608870	Asymmetric localization of PCP proteins	0.15941	0.158875	0.159659	0.155236	0.157003	0.156348	0.152448
R-HSA-4641257	Degradation of AXIN	0.172223	0.173338	0.173204	0.171612	0.172986	0.172452	0.166605
R-HSA-4641258	Degradation of DVL	0.193841	0.196795	0.19408	0.192633	0.192394	0.189576	0.180931
R-HSA-5358346	Hedgehog ligand biogenesis	0.179621	0.180576	0.181542	0.176317	0.179135	0.174557	0.175646
R-HSA-5358351	Signaling by Hedgehog	0.134385	0.136615	0.135685	0.138086	0.13633	0.137094	0.129892
R-HSA-5607761	Dectin-1 mediated noncanonical NF-kB signaling	0.206478	0.202962	0.208048	0.203442	0.204123	0.202656	0.200647
R-HSA-5607764	CLEC7A (Dectin-1) signaling	0.182342	0.176027	0.176898	0.178304	0.177309	0.177818	0.177564
R-HSA-5610780	Degradation of GLI1 by the proteasome	0.164558	0.16095	0.163493	0.160728	0.163718	0.160421	0.157137
R-HSA-5610783	Degradation of GLI2 by the proteasome	0.162038	0.159721	0.161124	0.159234	0.162604	0.158746	0.150085
R-HSA-5610785	GLI3 is processed to GLI3R by the proteasome	0.161743	0.159498	0.160915	0.15894	0.162413	0.158277	0.149799
R-HSA-5610787	Hedgehog 'off' state	0.141582	0.142319	0.145973	0.142988	0.142791	0.142734	0.134965
R-HSA-5632684	Hedgehog 'on' state	0.144355	0.146499	0.143675	0.147015	0.14349	0.146364	0.138613
R-HSA-5658442	Regulation of RAS by GAPs	0.183462	0.181744	0.184256	0.177903	0.178195	0.178185	0.176093
R-HSA-5668541	TNFR2 non-canonical NF-kB pathway	0.146288	0.147455	0.14495	0.144112	0.146875	0.143887	0.137446
R-HSA-5676590	NIK-->noncanonical NF-kB signaling	0.205986	0.202754	0.210763	0.202062	0.205945	0.202029	0.196611
R-HSA-5687128	MAPK6/MAPK4 signaling	0.17104	0.165505	0.179473	0.168233	0.16889	0.164951	0.161148
R-HSA-5689603	UCH proteinases	0.163319	0.161596	0.169592	0.160912	0.162595	0.158624	0.156771
R-HSA-68827	CDT1 association with the CDC6:ORC:origin complex	0.169307	0.168671	0.199333	0.164654	0.170469	0.164671	0.160722
R-HSA-68867	Assembly of the pre-replicative complex	0.161713	0.157121	0.198213	0.155235	0.161033	0.154844	0.14882
R-HSA-68882	Mitotic Anaphase	0.15917	0.158485	0.194636	0.160883	0.16024	0.15304	0.152164
R-HSA-68949	Orc1 removal from chromatin	0.159898	0.155261	0.189541	0.155571	0.159644	0.153837	0.145027
R-HSA-69002	DNA Replication Pre-Initiation	0.149423	0.142369	0.193662	0.141604	0.147039	0.139129	0.135313
R-HSA-69017	CDK-mediated phosphorylation and removal of Cdc6	0.168945	0.165552	0.20571	0.165143	0.1704	0.162322	0.164263
R-HSA-69052	Switching of origins to a post-replicative state	0.155252	0.150814	0.192792	0.151758	0.156527	0.149513	0.142096
R-HSA-69239	Synthesis of DNA	0.146415	0.141655	0.191799	0.140437	0.147278	0.138927	0.132777
R-HSA-69242	S Phase	0.155909	0.15078	0.190197	0.153092	0.153577	0.149279	0.139753
R-HSA-69306	DNA Replication	0.141516	0.136533	0.185598	0.136284	0.141886	0.133542	0.126819
R-HSA-69541	Stabilization of p53	0.183162	0.181346	0.189944	0.180793	0.179971	0.185033	0.17917
R-HSA-69563	p53-Dependent G1 DNA Damage Response	0.169315	0.165968	0.186979	0.167417	0.168138	0.17049	0.166939
R-HSA-69580	p53-Dependent G1/S DNA damage checkpoint	0.169315	0.165968	0.186979	0.167417	0.168138	0.17049	0.166939
R-HSA-69601	Ubiquitin Mediated Degradation of Phosphorylated Cdc25A	0.196358	0.194207	0.21178	0.190715	0.195988	0.190038	0.187821
R-HSA-69610	p53-Independent DNA Damage Response	0.196358	0.194207	0.21178	0.190715	0.195988	0.190038	0.187821
R-HSA-69613	p53-Independent G1/S DNA damage checkpoint	0.196358	0.194207	0.21178	0.190715	0.195988	0.190038	0.187821
R-HSA-69615	G1/S DNA Damage Checkpoints	0.169293	0.165422	0.189583	0.166839	0.168381	0.170003	0.166246
R-HSA-75815	Ubiquitin-dependent degradation of Cyclin D	0.188971	0.185412	0.195937	0.183377	0.188864	0.183451	0.176277
R-HSA-8852276	The role of GTSE1 in G2/M progression after G2 checkpoint	0.160542	0.156663	0.178045	0.158731	0.158381	0.159067	0.160363
R-HSA-8854050	FBXL7 down-regulates AURKA during mitotic entry and in early mitosis	0.182762	0.180068	0.195871	0.179096	0.182877	0.176488	0.16829
R-HSA-8932339	ROS sensing by NFE2L2	0.200408	0.201597	0.202116	0.199458	0.198432	0.195379	0.194214
R-HSA-8939236	RUNX1 regulates transcription of genes involved in differentiation of HSCs	0.158322	0.156511	0.168902	0.156909	0.154394	0.156782	0.151696
R-HSA-8939902	Regulation of RUNX2 expression and activity	0.207941	0.208929	0.216396	0.208514	0.206209	0.206692	0.196093
R-HSA-8948751	Regulation of PTEN stability and activity	0.148884	0.153418	0.153401	0.151401	0.149596	0.15057	0.142918
R-HSA-8951664	Neddylation	0.160164	0.154717	0.162806	0.155303	0.155903	0.155058	0.152568
R-HSA-9010553	Regulation of expression of SLITs and ROBOs	0.245287	0.246911	0.247358	0.244867	0.241549	0.241124	0.239034
R-HSA-9020702	Interleukin-1 signaling	0.165301	0.16015	0.160407	0.16022	0.159453	0.159704	0.1638
R-HSA-9707564	Cytoprotection by HMOX1	0.173282	0.174181	0.177281	0.176263	0.173297	0.169492	0.167405
R-HSA-9707587	Regulation of HMOX1 expression and activity	0.17374	0.176083	0.180827	0.17388	0.173602	0.171417	0.163792
R-HSA-9711123	Cellular response to chemical stress	0.16026	0.162817	0.163688	0.161851	0.161006	0.156397	0.156506
R-HSA-418597	G alpha (z) signalling events	0.0948661	0.0930871	0.0963662	0.087954	0.0979716	0.0963756	0.0966752
R-HSA-429914	Deadenylation-dependent mRNA decay	0.201015	0.200307	0.201882	0.204229	0.199457	0.195157	0.190223
R-HSA-429947	Deadenylation of mRNA	0.237809	0.234379	0.234053	0.242639	0.232074	0.234572	0.226736
R-HSA-6804115	TP53 regulates transcription of additional cell cycle genes whose exact role in the p53 pathway remain uncertain	0.162594	0.153027	0.180949	0.158953	0.15456	0.163803	0.157563
R-HSA-70921	Histidine catabolism	-0.127443	-0.123947	-0.143232	-0.128117	-0.13514	-0.111515	-0.0290151
R-HSA-74158	RNA Polymerase III Transcription	0.115902	0.12922	0.121124	0.123807	0.11746	0.121613	0.101793
R-HSA-749476	RNA Polymerase III Abortive And Retractive Initiation	0.115902	0.12922	0.121124	0.123807	0.11746	0.121613	0.101793
R-HSA-76046	RNA Polymerase III Transcription Initiation	0.11736	0.129084	0.1231	0.122763	0.119591	0.122221	0.0981801
R-HSA-76061	RNA Polymerase III Transcription Initiation From Type 1 Promoter	0.121642	0.135543	0.131522	0.128751	0.124065	0.131904	0.106352
R-HSA-76066	RNA Polymerase III Transcription Initiation From Type 2 Promoter	0.119597	0.133511	0.129405	0.126693	0.122129	0.129918	0.104405
R-HSA-76071	RNA Polymerase III Transcription Initiation From Type 3 Promoter	0.117231	0.128354	0.120436	0.121616	0.119248	0.119326	0.0979047
R-HSA-163125	Post-translational modification: synthesis of GPI-anchored proteins	-0.0353322	-0.0197471	-0.0367431	-0.0453616	-0.0274984	-0.0370541	-0.0157921
R-HSA-70171	Glycolysis	0.127332	0.122827	0.138371	0.124966	0.127401	0.120949	0.12468
R-HSA-70326	Glucose metabolism	0.118817	0.114293	0.131609	0.11516	0.118728	0.113447	0.119212
R-HSA-71387	Metabolism of carbohydrates	0.0881565	0.0866376	0.0918362	0.0825668	0.0868045	0.0883706	0.0993384
R-HSA-163560	Triglyceride catabolism	0.120936	0.117307	0.115098	0.121981	0.115275	0.121987	0.120086
R-HSA-8979227	Triglyceride metabolism	0.123702	0.11983	0.117397	0.123951	0.118804	0.123137	0.122588
R-HSA-5663213	RHO GTPases Activate WASPs and WAVEs	0.141059	0.136889	0.128015	0.138292	0.140297	0.138247	0.12981
R-HSA-156580	Phase II - Conjugation of compounds	0.0470441	0.0482224	0.0561729	0.0346287	0.0533928	0.0430379	0.0637356
R-HSA-156590	Glutathione conjugation	0.032264	0.053376	0.0437716	0.0261361	0.0442168	0.0398739	0.0731874
R-HSA-174403	Glutathione synthesis and recycling	-0.0411517	-0.0394882	0.00318976	-0.049785	-0.0247305	-0.0456833	-0.051522
R-HSA-211859	Biological oxidations	0.0444716	0.0431699	0.0418926	0.0404065	0.0438268	0.0484812	0.0670675
R-HSA-5423646	Aflatoxin activation and detoxification	0.022199	0.0487772	0.0163112	0.0304466	0.0161469	0.0305893	0.0503555
R-HSA-977347	Serine biosynthesis	-0.0356409	-0.024723	-0.00397892	-0.0426568	-0.0433393	-0.0679729	-0.0265664
R-HSA-1474228	Degradation of the extracellular matrix	0.0329037	0.0256272	0.026886	0.0217271	0.0330689	0.0372788	0.0544666
R-HSA-1445148	Translocation of SLC2A4 (GLUT4) to the plasma membrane	0.120174	0.123576	0.118416	0.122402	0.116895	0.121892	0.11946
R-HSA-157858	Gap junction trafficking and regulation	0.0969272	0.0938964	0.104885	0.0950627	0.107675	0.0940498	0.107715
R-HSA-190828	Gap junction trafficking	0.096446	0.094515	0.105272	0.0958404	0.107812	0.0942697	0.107545
R-HSA-190840	Microtubule-dependent trafficking of connexons from Golgi to the plasma membrane	0.134546	0.149196	0.172874	0.145073	0.149262	0.150538	0.16069
R-HSA-190861	Gap junction assembly	0.0590526	0.0583313	0.0769617	0.0525192	0.0742497	0.0628094	0.081945
R-HSA-190872	Transport of connexons to the plasma membrane	0.0799125	0.0892827	0.116489	0.0943937	0.102864	0.101912	0.111096
R-HSA-199977	ER to Golgi Anterograde Transport	0.0982021	0.104916	0.100088	0.101196	0.0975145	0.0966337	0.0969487
R-HSA-2132295	MHC class II antigen presentation	0.144294	0.143441	0.170487	0.142548	0.146142	0.133072	0.146862
R-HSA-2500257	Resolution of Sister Chromatid Cohesion	0.129534	0.127715	0.188424	0.13275	0.13424	0.12239	0.122706
R-HSA-2995410	Nuclear Envelope (NE) Reassembly	0.14147	0.142884	0.169678	0.147811	0.144446	0.140906	0.141057
R-HSA-3371497	HSP90 chaperone cycle for steroid hormone receptors (SHR) in the presence of ligand	0.148331	0.143927	0.151604	0.15154	0.147453	0.148881	0.154907
R-HSA-380320	Recruitment of NuMA to mitotic centrosomes	0.11966	0.115111	0.1464	0.120659	0.118706	0.112262	0.11387
R-HSA-389958	Cooperation of Prefoldin and TriC/CCT in actin and tubulin folding	0.157886	0.166944	0.186705	0.164241	0.161113	0.160365	0.164791
R-HSA-389960	Formation of tubulin folding intermediates by CCT/TriC	0.149924	0.154662	0.186562	0.153936	0.159852	0.147921	0.163001
R-HSA-389977	Post-chaperonin tubulin folding pathway	0.160141	0.17901	0.197812	0.177261	0.181941	0.183308	0.19032
R-HSA-390466	Chaperonin-mediated protein folding	0.146134	0.145857	0.155585	0.145279	0.139027	0.145687	0.146611
R-HSA-391251	Protein folding	0.144921	0.145574	0.154584	0.144775	0.139073	0.145612	0.14589
R-HSA-438064	Post NMDA receptor activation events	0.120219	0.115253	0.114739	0.118072	0.119904	0.120667	0.113956
R-HSA-442755	Activation of NMDA receptors and postsynaptic events	0.114097	0.11023	0.107541	0.112896	0.113146	0.114073	0.107326
R-HSA-5626467	RHO GTPases activate IQGAPs	0.114296	0.117848	0.124949	0.122352	0.112667	0.12225	0.115815
R-HSA-5663220	RHO GTPases Activate Formins	0.125649	0.124958	0.163191	0.13021	0.130024	0.121771	0.114873
R-HSA-6807878	COPI-mediated anterograde transport	0.100997	0.10707	0.105909	0.104382	0.10076	0.0983496	0.0986197
R-HSA-6811436	COPI-independent Golgi-to-ER retrograde traffic	0.157005	0.163605	0.170304	0.165934	0.165137	0.164434	0.169395
R-HSA-68877	Mitotic Prometaphase	0.12314	0.118108	0.164182	0.12489	0.125342	0.115457	0.113317
R-HSA-8955332	Carboxyterminal post-translational modifications of tubulin	0.0767182	0.084845	0.111721	0.0907717	0.0889214	0.0883474	0.107617
R-HSA-948021	Transport to the Golgi and subsequent modification	0.0962509	0.102222	0.0962388	0.0981556	0.0948135	0.0948927	0.0958796
R-HSA-9609736	Assembly and cell surface presentation of NMDA receptors	0.0701456	0.0719648	0.0714512	0.0748658	0.0748275	0.0762347	0.0677165
R-HSA-9619483	Activation of AMPK downstream of NMDARs	0.132815	0.128556	0.130935	0.1342	0.137693	0.13944	0.137842
R-HSA-9646399	Aggrephagy	0.138209	0.137349	0.141978	0.135746	0.137356	0.132595	0.135901
R-HSA-9648025	EML4 and NUDC in mitotic spindle formation	0.124335	0.122968	0.180867	0.129669	0.129932	0.11984	0.11671
R-HSA-9663891	Selective autophagy	0.139368	0.136905	0.136977	0.13925	0.137983	0.137628	0.139622
R-HSA-9668328	Sealing of the nuclear envelope (NE) by ESCRT-III	0.166526	0.165292	0.186359	0.169902	0.176957	0.171284	0.193134
R-HSA-983189	Kinesins	0.0537753	0.0526057	0.117544	0.0604171	0.0614314	0.0451278	0.0537128
R-HSA-983231	Factors involved in megakaryocyte development and platelet production	0.113557	0.114031	0.131706	0.119738	0.111486	0.11535	0.117641
R-HSA-9639288	Amino acids regulate mTORC1	0.0988972	0.0952147	0.0913295	0.105512	0.106338	0.105284	0.0908192
R-HSA-9711097	Cellular response to starvation	0.202651	0.201612	0.202488	0.202867	0.201454	0.197225	0.197034
R-HSA-9013404	RAC2 GTPase cycle	0.112827	0.105901	0.108654	0.109975	0.105506	0.114707	0.119667
R-HSA-9013423	RAC3 GTPase cycle	0.105107	0.0993716	0.102113	0.100838	0.0955459	0.106412	0.111961
R-HSA-5620920	Cargo trafficking to the periciliary membrane	0.0852905	0.087127	0.0859521	0.0793199	0.0826128	0.0829345	0.0802781
R-HSA-5624138	Trafficking of myristoylated proteins to the cilium	0.0128639	0.0620175	0.0424026	0.0559121	0.0384348	0.0661197	0.0411121
R-HSA-389661	Glyoxylate metabolism and glycine degradation	0.0389062	0.0451408	0.0661976	0.0335081	0.0443715	0.0412293	0.0372389
R-HSA-112382	Formation of RNA Pol II elongation complex	0.158901	0.170178	0.172538	0.167229	0.160519	0.164795	0.155861
R-HSA-674695	RNA Polymerase II Pre-transcription Events	0.160112	0.169593	0.169619	0.166039	0.16061	0.163544	0.155251
R-HSA-6796648	TP53 Regulates Transcription of DNA Repair Genes	0.137277	0.138806	0.156304	0.140924	0.135424	0.140378	0.130502
R-HSA-75955	RNA Polymerase II Transcription Elongation	0.158901	0.170178	0.172538	0.167229	0.160519	0.164795	0.155861
R-HSA-2172127	DAP12 interactions	0.0994191	0.0957999	0.0946909	0.104316	0.100726	0.10745	0.103134
R-HSA-1442490	Collagen degradation	0.0257202	0.0123442	0.0156183	0.00646806	0.030703	0.0275862	0.0333765
R-HSA-1474290	Collagen formation	0.0178305	0.0109613	0.00176719	0.00478439	0.0152156	0.0095004	0.0322917
R-HSA-1650814	Collagen biosynthesis and modifying enzymes	0.0250692	0.015104	0.00898954	0.0111474	0.0228971	0.0157231	0.0415147
R-HSA-186797	Signaling by PDGF	0.0780794	0.0716054	0.0632908	0.0747905	0.0734296	0.0800229	0.0805497
R-HSA-2022090	Assembly of collagen fibrils and other multimeric structures	-0.00496017	-0.0165711	-0.023529	-0.0175342	-0.00623983	-0.0088455	0.00653254
R-HSA-216083	Integrin cell surface interactions	0.13588	0.132587	0.147219	0.130011	0.138988	0.140119	0.150253
R-HSA-3000178	ECM proteoglycans	0.100826	0.098398	0.0995625	0.102953	0.104791	0.109761	0.123973
R-HSA-375165	NCAM signaling for neurite out-growth	0.0905113	0.0840941	0.0818154	0.090369	0.0871131	0.0887595	0.0890676
R-HSA-419037	NCAM1 interactions	-0.099034	-0.112231	-0.12127	-0.105002	-0.102324	-0.0820044	-0.0569951
R-HSA-8948216	Collagen chain trimerization	-0.00934004	-0.0329798	-0.0321002	-0.0300794	-0.0123419	-0.0128902	0.00334977
R-HSA-9013026	RHOB GTPase cycle	0.0677043	0.0586845	0.0702821	0.0633943	0.0574149	0.0706062	0.0830708
R-HSA-9013405	RHOD GTPase cycle	0.0770237	0.0721632	0.0816969	0.0725702	0.067035	0.0782985	0.0836055
R-HSA-9013409	RHOJ GTPase cycle	0.0883617	0.0836457	0.0825418	0.083855	0.0845993	0.0884794	0.0900194
R-HSA-9035034	RHOF GTPase cycle	0.0932608	0.0872348	0.0954924	0.0845472	0.0835936	0.0931149	0.0988909
R-HSA-5362798	Release of Hh-Np from the secreting cell	0.0522009	0.0995694	0.0851199	0.096084	0.0880045	0.108005	0.102225
R-HSA-1169408	ISG15 antiviral mechanism	0.144209	0.13766	0.144281	0.140897	0.140537	0.136691	0.141943
R-HSA-1169410	Antiviral mechanism by IFN-stimulated genes	0.143304	0.137172	0.14491	0.140399	0.140565	0.135795	0.139937
R-HSA-159227	Transport of the SLBP independent Mature mRNA	0.136162	0.143999	0.156701	0.147036	0.134203	0.1333	0.130471
R-HSA-159230	Transport of the SLBP Dependant Mature mRNA	0.138523	0.144502	0.15901	0.147365	0.13625	0.133418	0.130952
R-HSA-159231	Transport of Mature mRNA Derived from an Intronless Transcript	0.138351	0.145006	0.158727	0.149042	0.136403	0.134655	0.13184
R-HSA-159234	Transport of Mature mRNAs Derived from Intronless Transcripts	0.140564	0.145473	0.160896	0.14933	0.138318	0.13475	0.132282
R-HSA-159236	Transport of Mature mRNA derived from an Intron-Containing Transcript	0.165065	0.173651	0.177949	0.171953	0.164512	0.161252	0.157241
R-HSA-170822	Regulation of Glucokinase by Glucokinase Regulatory Protein	0.102055	0.0972304	0.142028	0.105086	0.0994633	0.0832328	0.0912431
R-HSA-191859	snRNP Assembly	0.164084	0.166249	0.189374	0.165829	0.164982	0.156974	0.153568
R-HSA-194441	Metabolism of non-coding RNA	0.164084	0.166249	0.189374	0.165829	0.164982	0.156974	0.153568
R-HSA-211000	Gene Silencing by RNA	0.138163	0.141584	0.162368	0.142178	0.136985	0.134189	0.123059
R-HSA-2980766	Nuclear Envelope Breakdown	0.119202	0.117468	0.160547	0.120228	0.119278	0.112752	0.115493
R-HSA-3108214	SUMOylation of DNA damage response and repair proteins	0.118948	0.113155	0.139021	0.117291	0.118178	0.10795	0.106502
R-HSA-3232142	SUMOylation of ubiquitinylation proteins	0.109578	0.110985	0.114147	0.113193	0.112032	0.109321	0.104688
R-HSA-3301854	Nuclear Pore Complex (NPC) Disassembly	0.108032	0.103111	0.182592	0.11004	0.11395	0.097442	0.105108
R-HSA-3371453	Regulation of HSF1-mediated heat shock response	0.117276	0.114735	0.122897	0.118144	0.115596	0.111222	0.114889
R-HSA-3371556	Cellular response to heat stress	0.119682	0.117032	0.124719	0.122291	0.119075	0.119462	0.119811
R-HSA-4085377	SUMOylation of SUMOylation proteins	0.109266	0.107949	0.117668	0.114201	0.107739	0.0991291	0.0996759
R-HSA-4551638	SUMOylation of chromatin organization proteins	0.12091	0.119122	0.133915	0.123862	0.11896	0.115328	0.110606
R-HSA-4570464	SUMOylation of RNA binding proteins	0.13096	0.131198	0.144279	0.1365	0.128432	0.122648	0.121123
R-HSA-4615885	SUMOylation of DNA replication proteins	0.135269	0.131007	0.16746	0.133521	0.133876	0.12379	0.126927
R-HSA-5578749	Transcriptional regulation by small RNAs	0.146145	0.148314	0.179857	0.149898	0.145107	0.141233	0.128251
R-HSA-6784531	tRNA processing in the nucleus	0.130042	0.135146	0.164825	0.134715	0.132511	0.122384	0.115286
R-HSA-68875	Mitotic Prophase	0.110538	0.112147	0.140391	0.115632	0.112356	0.107758	0.103096
R-HSA-72202	Transport of Mature Transcript to Cytoplasm	0.166096	0.172659	0.178885	0.171639	0.165098	0.160349	0.157423
R-HSA-5635838	Activation of SMO	0.0746381	0.083266	0.0797069	0.085372	0.0829267	0.0879805	0.071462
R-HSA-2565942	Regulation of PLK1 Activity at G2/M Transition	0.127271	0.122322	0.140916	0.126807	0.126065	0.122955	0.118752
R-HSA-380259	Loss of Nlp from mitotic centrosomes	0.122607	0.116835	0.147871	0.122281	0.12114	0.114548	0.114035
R-HSA-380270	Recruitment of mitotic centrosome proteins and complexes	0.121611	0.116628	0.146399	0.122533	0.120056	0.113693	0.113407
R-HSA-380284	Loss of proteins required for interphase microtubule organization from the centrosome	0.122607	0.116835	0.147871	0.122281	0.12114	0.114548	0.114035
R-HSA-380287	Centrosome maturation	0.121611	0.116628	0.146399	0.122533	0.120056	0.113693	0.113407
R-HSA-5620912	Anchoring of the basal body to the plasma membrane	0.120692	0.116808	0.142873	0.121668	0.119406	0.114233	0.112554
R-HSA-8854518	AURKA Activation by TPX2	0.121048	0.11521	0.149468	0.120976	0.120244	0.113318	0.112278
R-HSA-977443	GABA receptor activation	0.0498258	0.0600312	0.050864	0.0415164	0.0548144	0.0502762	0.0421546
R-HSA-1980143	Signaling by NOTCH1	0.161061	0.159679	0.163667	0.164361	0.158773	0.163011	0.153816
R-HSA-1980145	Signaling by NOTCH2	0.175927	0.16894	0.162588	0.167687	0.173921	0.174003	0.168416
R-HSA-2122948	Activated NOTCH1 Transmits Signal to the Nucleus	0.177592	0.169517	0.167631	0.172855	0.174956	0.177704	0.177493
R-HSA-2979096	NOTCH2 Activation and Transmission of Signal to the Nucleus	0.176417	0.165343	0.164423	0.161738	0.175719	0.173256	0.16905
R-HSA-9012852	Signaling by NOTCH3	0.163285	0.161999	0.15952	0.162727	0.158518	0.165352	0.166267
R-HSA-9013507	NOTCH3 Activation and Transmission of Signal to the Nucleus	0.16821	0.165973	0.165745	0.16348	0.165268	0.170935	0.170505
R-HSA-606279	Deposition of new CENPA-containing nucleosomes at the centromere	0.133566	0.121528	0.183407	0.124226	0.130883	0.116486	0.11109
R-HSA-73886	Chromosome Maintenance	0.142113	0.140235	0.181901	0.139247	0.142821	0.134375	0.131643
R-HSA-774815	Nucleosome assembly	0.133566	0.121528	0.183407	0.124226	0.130883	0.116486	0.11109
R-HSA-111885	Opioid Signalling	0.12373	0.123257	0.124281	0.124009	0.120364	0.127322	0.118199
R-HSA-112040	G-protein mediated events	0.115162	0.111366	0.112033	0.111829	0.115926	0.116946	0.11817
R-HSA-170670	Adenylate cyclase inhibitory pathway	-0.00618285	0.0119526	-0.000731924	0.011564	0.00908803	0.0245016	0.0220496
R-HSA-2980736	Peptide hormone metabolism	0.0751775	0.0780629	0.0689752	0.0725661	0.0705045	0.0717177	0.0781055
R-HSA-381771	Synthesis, secretion, and inactivation of Glucagon-like Peptide-1 (GLP-1)	0.0609589	0.0575761	0.0640782	0.059691	0.0540935	0.0574414	0.0654472
R-HSA-392170	ADP signalling through P2Y purinoceptor 12	0.0923972	0.104194	0.0938161	0.0844174	0.086344	0.0868526	0.076499
R-HSA-392518	Signal amplification	0.116155	0.117059	0.110154	0.102824	0.103753	0.110939	0.10991
R-HSA-400508	Incretin synthesis, secretion, and inactivation	0.0611187	0.0595407	0.0641105	0.0610864	0.0533596	0.0578347	0.0646977
R-HSA-418555	G alpha (s) signalling events	0.0654679	0.0586941	0.0526036	0.060097	0.0540284	0.0735767	0.0737905
R-HSA-977444	GABA B receptor activation	0.0498661	0.0634796	0.0529289	0.0454417	0.0577792	0.0502171	0.0466543
R-HSA-991365	Activation of GABAB receptors	0.0498661	0.0634796	0.0529289	0.0454417	0.0577792	0.0502171	0.0466543
R-HSA-5620922	BBSome-mediated cargo-targeting to cilium	0.100411	0.0969205	0.108054	0.0926568	0.100333	0.0986172	0.0918618
R-HSA-1461957	Beta defensins	0.120998	0.134239	0.121615	0.0977361	0.0886895	0.105931	0.075547
R-HSA-1461973	Defensins	0.21902	0.216807	0.218868	0.20799	0.212096	0.210425	0.197862
R-HSA-6803157	Antimicrobial peptides	0.127636	0.134676	0.128205	0.121705	0.131519	0.134964	0.135901
R-HSA-390918	Peroxisomal lipid metabolism	0.0207993	0.0185464	0.00804597	0.0248665	0.0163058	0.0290621	0.0189196
R-HSA-9033241	Peroxisomal protein import	0.116975	0.11288	0.110584	0.117875	0.116199	0.114668	0.11304
R-HSA-1187000	Fertilization	0.0193061	0.00724993	0.00296574	0.0151207	0.0261289	0.0324223	0.0450856
R-HSA-1300642	Sperm Motility And Taxes	-0.144863	-0.160907	-0.145734	-0.124311	-0.122556	-0.0631168	-0.0530395
R-HSA-198693	AKT phosphorylates targets in the nucleus	0.196737	0.208108	0.196978	0.201379	0.179757	0.190057	0.182402
R-HSA-9614085	FOXO-mediated transcription	0.133966	0.129204	0.133016	0.135481	0.128848	0.13455	0.131458
R-HSA-9614399	Regulation of localization of FOXO transcription factors	0.132796	0.134426	0.133742	0.13573	0.12362	0.133282	0.128763
R-HSA-9615017	FOXO-mediated transcription of oxidative stress, metabolic and neuronal genes	0.13584	0.134409	0.134342	0.143574	0.132001	0.140721	0.140824
R-HSA-211897	Cytochrome P450 - arranged by substrate type	0.0435484	0.0232332	0.0225795	0.0318176	0.03274	0.0342349	0.0431673
R-HSA-211945	Phase I - Functionalization of compounds	0.0442042	0.0413159	0.0339653	0.0451726	0.0403264	0.0534679	0.0697269
R-HSA-211976	Endogenous sterols	0.102073	0.0692375	0.068355	0.0810983	0.082439	0.0851283	0.0933059
R-HSA-211981	Xenobiotics	0.0464171	0.0329501	0.0317988	0.0527558	0.0542801	0.0562101	0.099331
R-HSA-8937144	Aryl hydrocarbon receptor signalling	0.100906	0.0958172	0.0970398	0.108103	0.100454	0.123562	0.122127
R-HSA-8983711	OAS antiviral response	0.154917	0.143707	0.158399	0.147417	0.156926	0.139184	0.132688
R-HSA-9013424	RHOV GTPase cycle	0.0958541	0.0869069	0.0864131	0.0922181	0.0903413	0.093594	0.0869521
R-HSA-193144	Estrogen biosynthesis	0.113102	0.120923	0.0860097	0.119781	0.123176	0.121087	0.133718
R-HSA-196071	Metabolism of steroid hormones	0.0853176	0.0780851	0.0654666	0.0719595	0.0821211	0.0870133	0.103517
R-HSA-8957322	Metabolism of steroids	0.0929539	0.0954698	0.0919762	0.0916588	0.0954879	0.0957927	0.0983751
R-HSA-199992	trans-Golgi Network Vesicle Budding	0.131007	0.13175	0.128152	0.132464	0.128794	0.131143	0.137439
R-HSA-432720	Lysosome Vesicle Biogenesis	0.132468	0.133742	0.131342	0.133744	0.130419	0.132575	0.138283
R-HSA-75896	Plasmalogen biosynthesis	0.0480129	-0.0137764	0.0020578	0.0101579	0.0346445	0.000634392	0.0948542
R-HSA-8848584	Wax and plasmalogen biosynthesis	0.0351465	0.0203742	0.00937352	0.0306583	0.0198982	0.0278856	0.0957597
R-HSA-9033500	TYSND1 cleaves peroxisomal proteins	0.0663786	0.0362703	0.0681162	0.0642139	0.0763777	0.0681236	0.0926631
R-HSA-141424	Amplification of signal from the kinetochores	0.121132	0.118728	0.176943	0.124668	0.12454	0.113174	0.109279
R-HSA-141444	Amplification of signal from unattached kinetochores via a MAD2 inhibitory signal	0.121132	0.118728	0.176943	0.124668	0.12454	0.113174	0.109279
R-HSA-69618	Mitotic Spindle Checkpoint	0.119869	0.117913	0.176331	0.123054	0.123236	0.112009	0.109355
R-HSA-187037	Signaling by NTRK1 (TRKA)	0.120394	0.115133	0.116366	0.122386	0.118267	0.120717	0.121398
R-HSA-198725	Nuclear Events (kinase and transcription factor activation)	0.124044	0.120319	0.127115	0.126657	0.126286	0.125101	0.121406
R-HSA-6804757	Regulation of TP53 Degradation	0.141171	0.140673	0.15358	0.143368	0.13809	0.142362	0.137752
R-HSA-6806003	Regulation of TP53 Expression and Degradation	0.141833	0.141109	0.154102	0.143862	0.138756	0.14277	0.137947
R-HSA-9031628	NGF-stimulated transcription	0.10959	0.111675	0.114526	0.113733	0.113286	0.111362	0.110285
R-HSA-15869	Metabolism of nucleotides	0.111922	0.118999	0.139996	0.102987	0.112976	0.111666	0.106715
R-HSA-73614	Pyrimidine salvage	0.0689856	0.0945484	0.104084	0.075164	0.0905459	0.105431	0.0659471
R-HSA-8956321	Nucleotide salvage	0.123949	0.140519	0.139768	0.125097	0.114029	0.144873	0.120524
R-HSA-373080	Class B/2 (Secretin family receptors)	-0.0100128	-0.00586641	-0.0169602	-0.0179365	-0.019367	0.00154591	0.0180776
R-HSA-500792	GPCR ligand binding	0.0648409	0.0686027	0.0622121	0.0638466	0.0624997	0.0689701	0.0751071
R-HSA-72187	mRNA 3'-end processing	0.210665	0.21856	0.220977	0.219454	0.213907	0.21221	0.198064
R-HSA-73856	RNA Polymerase II Transcription Termination	0.21488	0.220984	0.227859	0.220041	0.217979	0.213535	0.200601
R-HSA-77289	Mitochondrial Fatty Acid Beta-Oxidation	0.0741422	0.0740521	0.0924829	0.0543724	0.0718556	0.0755883	0.0857708
R-HSA-212165	Epigenetic regulation of gene expression	0.140703	0.145088	0.150372	0.148678	0.140033	0.143176	0.131771
R-HSA-5250913	Positive epigenetic regulation of rRNA expression	0.141828	0.147296	0.156949	0.150785	0.141305	0.14519	0.130152
R-HSA-5250924	B-WICH complex positively regulates rRNA expression	0.135455	0.14407	0.156394	0.141819	0.136312	0.139345	0.120088
R-HSA-5693565	Recruitment and ATM-mediated phosphorylation of repair and signaling proteins at DNA double strand breaks	0.142268	0.136794	0.147233	0.139889	0.135235	0.135798	0.131186
R-HSA-5693606	DNA Double Strand Break Response	0.14093	0.134886	0.146636	0.138893	0.134632	0.134608	0.129237
R-HSA-397014	Muscle contraction	0.0706507	0.0677912	0.0612528	0.0658123	0.068666	0.0697076	0.0698278
R-HSA-5576891	Cardiac conduction	0.0585056	0.0564409	0.0451443	0.0552979	0.0568183	0.0587323	0.0678002
R-HSA-5578775	Ion homeostasis	0.0753236	0.0712888	0.0655697	0.0742012	0.0815478	0.0773212	0.0790003
R-HSA-936837	Ion transport by P-type ATPases	0.0784618	0.0691127	0.07198	0.0715351	0.0955753	0.084808	0.0816467
R-HSA-447115	Interleukin-12 family signaling	0.174115	0.170787	0.171848	0.169711	0.166753	0.16706	0.166791
R-HSA-8950505	Gene and protein expression by JAK-STAT signaling after Interleukin-12 stimulation	0.195059	0.19498	0.197414	0.196766	0.192524	0.195677	0.183883
R-HSA-9020591	Interleukin-12 signaling	0.18473	0.183848	0.183491	0.182351	0.180068	0.181265	0.175458
R-HSA-1296071	Potassium Channels	-0.0162996	-0.00405846	-0.0166761	-0.0271569	-0.0148382	-0.0266594	-0.0198283
R-HSA-1296346	Tandem pore domain potassium channels	0.138685	0.129345	0.143945	0.15832	0.14669	0.109026	0.150299
R-HSA-1299308	Tandem of pore domain in a weak inwardly rectifying K+ channels (TWIK)	0.0331938	0.0306455	0.0375925	0.0719692	0.0604554	0.0218494	0.0995992
R-HSA-5576886	Phase 4 - resting membrane potential	0.0208829	0.0396099	0.0219811	0.0305675	0.0330319	0.0152423	0.0480835
R-HSA-451927	Interleukin-2 family signaling	0.129208	0.12222	0.115316	0.127949	0.126069	0.134308	0.130832
R-HSA-114516	Disinhibition of SNARE formation	0.128361	0.130049	0.115457	0.121086	0.129956	0.127122	0.132897
R-HSA-76005	Response to elevated platelet cytosolic Ca2+	0.113495	0.111128	0.10987	0.112517	0.114435	0.116329	0.123688
R-HSA-166662	Lectin pathway of complement activation	-0.288661	-0.280562	-0.317253	-0.233803	-0.287565	-0.287495	-0.2133
R-HSA-2855086	Ficolins bind to repetitive carbohydrate structures on the target cell surface	-0.252812	-0.268542	-0.306427	-0.231663	-0.249147	-0.283299	-0.278646
R-HSA-114608	Platelet degranulation	0.108534	0.106405	0.106639	0.109005	0.110417	0.112938	0.121712
R-HSA-432722	Golgi Associated Vesicle Biogenesis	0.1495	0.14516	0.140686	0.14668	0.143616	0.140927	0.148175
R-HSA-156584	Cytosolic sulfonation of small molecules	0.0270179	0.0156897	0.0373471	0.0237838	0.0421779	0.0237629	0.0633402
R-HSA-140534	Caspase activation via Death Receptors in the presence of ligand	0.0724336	0.0759507	0.0598969	0.0732147	0.0683539	0.0706959	0.066327
R-HSA-2562578	TRIF-mediated programmed cell death	0.174692	0.166652	0.159222	0.15675	0.17041	0.14394	0.150172
R-HSA-5357769	Caspase activation via extrinsic apoptotic signalling pathway	0.0778711	0.0823907	0.06984	0.0815928	0.0759432	0.0765425	0.0765489
R-HSA-5686938	Regulation of TLR by endogenous ligand	0.118694	0.132966	0.113659	0.103901	0.117243	0.120314	0.14897
R-HSA-936964	Activation of IRF3/IRF7 mediated by TBK1/IKK epsilon	0.144531	0.142937	0.133473	0.140081	0.137717	0.133391	0.131111
R-HSA-937041	IKK complex recruitment mediated by RIP1	0.169683	0.170101	0.156601	0.1624	0.159383	0.162931	0.166085
R-HSA-937072	TRAF6-mediated induction of TAK1 complex within TLR4 complex	0.167292	0.159573	0.150336	0.151826	0.154797	0.158004	0.161236
R-HSA-9707616	Heme signaling	0.138717	0.144627	0.138864	0.144714	0.136107	0.141401	0.141105
R-HSA-975163	IRAK2 mediated activation of TAK1 complex upon TLR7/8 or 9 stimulation	0.167292	0.159573	0.150336	0.151826	0.154797	0.158004	0.161236
R-HSA-1428517	The citric acid (TCA) cycle and respiratory electron transport	0.160147	0.162652	0.166285	0.152488	0.159597	0.159399	0.152388
R-HSA-163200	Respiratory electron transport, ATP synthesis by chemiosmotic coupling, and heat production by uncoupling proteins.	0.162842	0.16343	0.16597	0.149841	0.161846	0.158741	0.151666
R-HSA-611105	Respiratory electron transport	0.156221	0.156579	0.158602	0.143709	0.155875	0.152607	0.145378
R-HSA-6799198	Complex I biogenesis	0.130961	0.129645	0.130193	0.118306	0.130794	0.127975	0.12222
R-HSA-1630316	Glycosaminoglycan metabolism	0.0160295	0.0122849	-0.00231026	0.00323477	0.0143528	0.0275317	0.0632902
R-HSA-2142845	Hyaluronan metabolism	0.0725769	0.0842642	0.107869	0.0535572	0.0972795	0.0923295	0.141183
R-HSA-2142850	Hyaluronan biosynthesis and export	-0.224693	-0.283096	-0.277501	-0.262992	-0.254007	-0.269127	-0.19046
R-HSA-3371378	Regulation by c-FLIP	0.0786456	0.0804955	0.0669742	0.0814652	0.0752623	0.0794566	0.0701086
R-HSA-5213460	RIPK1-mediated regulated necrosis	0.120532	0.120366	0.120432	0.118194	0.11813	0.119295	0.11693
R-HSA-5218900	CASP8 activity is inhibited	0.0786456	0.0804955	0.0669742	0.0814652	0.0752623	0.0794566	0.0701086
R-HSA-5633008	TP53 Regulates Transcription of Cell Death Genes	0.105984	0.101111	0.108367	0.101402	0.0992056	0.102441	0.0985013
R-HSA-5675482	Regulation of necroptotic cell death	0.120207	0.120509	0.120327	0.118168	0.118385	0.119693	0.116861
R-HSA-6803211	TP53 Regulates Transcription of Death Receptors and Ligands	0.131049	0.12943	0.141137	0.129989	0.124472	0.132875	0.131218
R-HSA-69416	Dimerization of procaspase-8	0.0786456	0.0804955	0.0669742	0.0814652	0.0752623	0.0794566	0.0701086
R-HSA-75158	TRAIL signaling	0.145129	0.146966	0.142174	0.146995	0.148199	0.13499	0.132812
R-HSA-420499	Class C/3 (Metabotropic glutamate/pheromone receptors)	-0.055937	-0.0619887	-0.0865644	-0.0517318	-0.0915495	-0.0682421	-0.0424158
R-HSA-373076	Class A/1 (Rhodopsin-like receptors)	0.0805179	0.0847614	0.0778285	0.0802445	0.0792532	0.0835999	0.0904542
R-HSA-375276	Peptide ligand-binding receptors	0.086083	0.0882209	0.0847855	0.0852638	0.0856297	0.0881476	0.091419
R-HSA-174084	Autodegradation of Cdh1 by Cdh1:APC/C	0.183501	0.182304	0.208417	0.178709	0.184676	0.178446	0.179105
R-HSA-187577	SCF(Skp2)-mediated degradation of p27/p21	0.158403	0.153739	0.17562	0.155579	0.160496	0.154625	0.148339
R-HSA-69202	Cyclin E associated events during G1/S transition	0.169205	0.164385	0.188127	0.167974	0.165564	0.164833	0.154577
R-HSA-69206	G1/S Transition	0.158284	0.153274	0.187415	0.157371	0.156034	0.153595	0.144728
R-HSA-69656	Cyclin A:Cdk2-associated events at S phase entry	0.167632	0.162582	0.188505	0.166449	0.164583	0.1636	0.153103
R-HSA-8878159	Transcriptional regulation by RUNX3	0.160228	0.157507	0.164246	0.160042	0.154608	0.162035	0.154873
R-HSA-8941858	Regulation of RUNX3 expression and activity	0.190927	0.189273	0.190364	0.189367	0.18741	0.195095	0.187614
R-HSA-9013694	Signaling by NOTCH4	0.170024	0.169979	0.168173	0.169815	0.165726	0.167496	0.162995
R-HSA-9604323	Negative regulation of NOTCH4 signaling	0.177678	0.178766	0.178521	0.176395	0.172259	0.171966	0.169058
R-HSA-532668	N-glycan trimming in the ER and Calnexin/Calreticulin cycle	0.168941	0.165493	0.165269	0.166151	0.166545	0.16143	0.166876
R-HSA-901032	ER Quality Control Compartment (ERQC)	0.209829	0.205982	0.192008	0.20468	0.20429	0.199699	0.206521
R-HSA-901042	Calnexin/calreticulin cycle	0.177643	0.172563	0.170438	0.172376	0.173622	0.169916	0.178601
R-HSA-201451	Signaling by BMP	0.115132	0.134442	0.0982926	0.143899	0.12087	0.146379	0.140396
R-HSA-1500931	Cell-Cell communication	0.0700101	0.0650947	0.0657671	0.0695288	0.0708354	0.0714117	0.0679007
R-HSA-391160	Signal regulatory protein family interactions	0.0457672	0.0189115	0.0293087	0.0436236	0.05261	0.0550756	0.0687045
R-HSA-3299685	Detoxification of Reactive Oxygen Species	0.122407	0.124503	0.121212	0.119439	0.12709	0.118698	0.122549
R-HSA-6803544	Ion influx/efflux at host-pathogen interface	0.0439485	0.0660311	0.0255452	0.0322585	0.0322917	0.0392193	0.0430047
R-HSA-456926	Thrombin signalling through proteinase activated receptors (PARs)	0.132732	0.129557	0.125785	0.128128	0.1311	0.134753	0.127104
R-HSA-201722	Formation of the beta-catenin:TCF transactivating complex	0.140033	0.138738	0.150008	0.145365	0.135877	0.142112	0.131106
R-HSA-2173793	Transcriptional activity of SMAD2/SMAD3:SMAD4 heterotrimer	0.161569	0.163988	0.166644	0.17056	0.160028	0.166978	0.160767
R-HSA-2173796	SMAD2/SMAD3:SMAD4 heterotrimer regulates transcription	0.167081	0.168781	0.17151	0.175431	0.165125	0.171392	0.16625
R-HSA-3769402	Deactivation of the beta-catenin transactivating complex	0.153539	0.152797	0.152156	0.159261	0.147273	0.157184	0.154915
R-HSA-381426	Regulation of Insulin-like Growth Factor (IGF) transport and uptake by Insulin-like Growth Factor Binding Proteins (IGFBPs)	0.0898063	0.0899539	0.0819274	0.0868438	0.0867468	0.0932652	0.0994116
R-HSA-8957275	Post-translational protein phosphorylation	0.0957707	0.0949871	0.0878071	0.0920945	0.0919304	0.0974865	0.103826
R-HSA-2559580	Oxidative Stress Induced Senescence	0.169728	0.162086	0.177001	0.167687	0.163069	0.163328	0.158734
R-HSA-3899300	SUMOylation of transcription cofactors	0.153358	0.14758	0.150099	0.155699	0.148665	0.147093	0.145776
R-HSA-4655427	SUMOylation of DNA methylation proteins	0.143587	0.141185	0.145419	0.147019	0.139075	0.135394	0.130313
R-HSA-8939243	RUNX1 interacts with co-factors whose precise effect on RUNX1 targets is not known	0.186393	0.178802	0.19026	0.186133	0.181973	0.182733	0.166802
R-HSA-8943724	Regulation of PTEN gene transcription	0.148262	0.145487	0.152342	0.153255	0.145303	0.15182	0.15011
R-HSA-9609523	Insertion of tail-anchored proteins into the endoplasmic reticulum membrane	0.117412	0.119473	0.117877	0.119053	0.125698	0.122516	0.134449
R-HSA-113418	Formation of the Early Elongation Complex	0.181156	0.195693	0.196038	0.192285	0.179617	0.188893	0.169938
R-HSA-6807505	RNA polymerase II transcribes snRNA genes	0.172342	0.180773	0.176427	0.181052	0.171742	0.174368	0.161269
R-HSA-72086	mRNA Capping	0.195638	0.207584	0.207519	0.20685	0.193611	0.202989	0.180743
R-HSA-77075	RNA Pol II CTD phosphorylation and interaction with CE	0.173962	0.186061	0.185309	0.181763	0.17038	0.178219	0.157182
R-HSA-6804756	Regulation of TP53 Activity through Phosphorylation	0.127417	0.121234	0.142701	0.123661	0.124786	0.12544	0.120134
R-HSA-73776	RNA Polymerase II Promoter Escape	0.15788	0.168003	0.15848	0.161224	0.154917	0.159087	0.143179
R-HSA-73779	RNA Polymerase II Transcription Pre-Initiation And Promoter Opening	0.15788	0.168003	0.15848	0.161224	0.154917	0.159087	0.143179
R-HSA-75953	RNA Polymerase II Transcription Initiation	0.15788	0.168003	0.15848	0.161224	0.154917	0.159087	0.143179
R-HSA-76042	RNA Polymerase II Transcription Initiation And Promoter Clearance	0.15788	0.168003	0.15848	0.161224	0.154917	0.159087	0.143179
R-HSA-444209	Free fatty acid receptors	0.077107	0.0878693	0.0696365	0.0635374	0.0747847	0.074397	0.104616
R-HSA-140342	Apoptosis induced DNA fragmentation	0.172078	0.172067	0.190989	0.170583	0.177853	0.171104	0.174669
R-HSA-75153	Apoptotic execution phase	0.10493	0.102168	0.10751	0.103821	0.098489	0.10308	0.104912
R-HSA-1181150	Signaling by NODAL	0.102275	0.116567	0.0772897	0.120384	0.0946814	0.117254	0.124776
R-HSA-1433617	Regulation of signaling by NODAL	0.00517617	0.034124	-0.0277682	0.038426	-0.00573178	0.0296759	0.0611934
R-HSA-5669034	TNFs bind their physiological receptors	0.144409	0.13201	0.123964	0.117404	0.148685	0.124897	0.10741
R-HSA-156827	L13a-mediated translational silencing of Ceruloplasmin expression	0.307007	0.3064	0.300704	0.307179	0.298578	0.299621	0.306459
R-HSA-72613	Eukaryotic Translation Initiation	0.293398	0.294107	0.288386	0.294766	0.285532	0.289759	0.295637
R-HSA-72649	Translation initiation complex formation	0.281828	0.282276	0.27173	0.28105	0.270782	0.27277	0.281714
R-HSA-72662	Activation of the mRNA upon binding of the cap-binding complex and eIFs, and subsequent binding to 43S	0.273666	0.27411	0.263995	0.27232	0.261715	0.266244	0.273992
R-HSA-72689	Formation of a pool of free 40S subunits	0.319781	0.31942	0.315701	0.319973	0.315659	0.313793	0.320709
R-HSA-72695	Formation of the ternary complex, and subsequently, the 43S complex	0.296161	0.298293	0.286829	0.293885	0.286074	0.286819	0.296541
R-HSA-72702	Ribosomal scanning and start codon recognition	0.278054	0.279092	0.271189	0.276288	0.268407	0.269513	0.278582
R-HSA-72706	GTP hydrolysis and joining of the 60S ribosomal subunit	0.306986	0.306809	0.303407	0.306581	0.299895	0.300232	0.306621
R-HSA-72737	Cap-dependent Translation Initiation	0.293398	0.294107	0.288386	0.294766	0.285532	0.289759	0.295637
R-HSA-72766	Translation	0.211829	0.21475	0.22084	0.205215	0.20957	0.20778	0.2051
R-HSA-112308	Presynaptic depolarization and calcium channel opening	-0.217537	-0.237902	-0.266153	-0.222097	-0.265913	-0.225443	-0.205308
R-HSA-9013420	RHOU GTPase cycle	0.0890363	0.08605	0.0825743	0.0893292	0.086711	0.0944434	0.0871154
R-HSA-176187	Activation of ATR in response to replication stress	0.0901942	0.0815135	0.169524	0.0833677	0.0924455	0.0883909	0.0779656
R-HSA-68962	Activation of the pre-replicative complex	0.0619101	0.0447497	0.165483	0.0513265	0.0617022	0.0494375	0.044859
R-HSA-8953750	Transcriptional Regulation by E2F6	0.124994	0.117974	0.153966	0.126787	0.118604	0.119758	0.10466
R-HSA-1368108	BMAL1:CLOCK,NPAS2 activates circadian gene expression	0.126136	0.127878	0.119746	0.134381	0.124699	0.128626	0.13358
R-HSA-400253	Circadian Clock	0.147934	0.149225	0.146618	0.151411	0.145479	0.150849	0.143694
R-HSA-1483255	PI Metabolism	0.0754511	0.0730218	0.0626768	0.0791547	0.0705119	0.0734374	0.0753244
R-HSA-1483257	Phospholipid metabolism	0.0690222	0.0706435	0.058422	0.0712627	0.0658236	0.071961	0.0806475
R-HSA-1660499	Synthesis of PIPs at the plasma membrane	0.0758713	0.0758775	0.0604355	0.0835529	0.0682173	0.0805822	0.0793588
R-HSA-512988	Interleukin-3, Interleukin-5 and GM-CSF signaling	0.130673	0.121674	0.116114	0.127515	0.12677	0.13084	0.141686
R-HSA-6811558	PI5P, PP2A and IER3 Regulate PI3K/AKT Signaling	0.177232	0.174329	0.1745	0.174543	0.171423	0.174315	0.172097
R-HSA-8853659	RET signaling	0.0918623	0.0803613	0.0789967	0.0822419	0.094781	0.0897406	0.102333
R-HSA-9006335	Signaling by Erythropoietin	0.0975498	0.0902573	0.0814022	0.091908	0.0896375	0.101685	0.108081
R-HSA-9027276	Erythropoietin activates Phosphoinositide-3-kinase (PI3K)	0.109144	0.0951116	0.0850464	0.10067	0.095743	0.109386	0.13467
R-HSA-912526	Interleukin receptor SHC signaling	0.104756	0.0952445	0.0873809	0.0917742	0.103823	0.103298	0.123642
R-HSA-912631	Regulation of signaling by CBL	0.144057	0.134975	0.128828	0.143175	0.134621	0.14983	0.158184
R-HSA-204174	Regulation of pyruvate dehydrogenase (PDH) complex	0.101317	0.0974999	0.0906668	0.101779	0.0860602	0.0963047	0.0758381
R-HSA-5362517	Signaling by Retinoic Acid	0.0865996	0.0851877	0.0708162	0.0894689	0.079363	0.091527	0.0921254
R-HSA-70268	Pyruvate metabolism	0.160391	0.164125	0.158938	0.166405	0.158144	0.163525	0.164423
R-HSA-71406	Pyruvate metabolism and Citric Acid (TCA) cycle	0.151444	0.162645	0.164614	0.158708	0.157712	0.161156	0.156924
R-HSA-425397	Transport of vitamins, nucleosides, and related molecules	0.0120755	0.0273054	0.0129087	0.0142553	0.0193682	0.0333119	0.044201
R-HSA-83936	Transport of nucleosides and free purine and pyrimidine bases across the plasma membrane	0.0528232	0.0705859	0.0581317	0.0587827	0.0570687	0.0630757	0.0599072
R-HSA-112310	Neurotransmitter release cycle	0.0747612	0.0796924	0.0666912	0.0769905	0.0813344	0.0652436	0.0828094
R-HSA-210500	Glutamate Neurotransmitter Release Cycle	0.0748677	0.0833112	0.0651554	0.07646	0.0877046	0.0733695	0.07789
R-HSA-425393	Transport of inorganic cations/anions and amino acids/oligopeptides	0.0447391	0.0276268	0.030877	0.026371	0.0403802	0.0331261	0.0653663
R-HSA-417957	P2Y receptors	0.0455024	0.0695325	0.0429427	0.0528269	0.0501181	0.0577596	0.101156
R-HSA-418038	Nucleotide-like (purinergic) receptors	0.00711448	0.0203038	0.00296524	0.0338273	0.0221641	0.0376151	0.0518852
R-HSA-202131	Metabolism of nitric oxide: NOS3 activation and regulation	0.161657	0.154434	0.150151	0.15909	0.157572	0.150639	0.148834
R-HSA-203641	NOSTRIN mediated eNOS trafficking	0.110144	0.0992628	0.092583	0.105184	0.111155	0.0937938	0.102584
R-HSA-2682334	EPH-Ephrin signaling	0.110116	0.104671	0.106472	0.104278	0.109759	0.109697	0.106624
R-HSA-373752	Netrin-1 signaling	0.0872734	0.0783596	0.0753207	0.0850193	0.0862282	0.0895119	0.0855345
R-HSA-373753	Nephrin family interactions	0.0919771	0.085513	0.0818685	0.0898746	0.0922676	0.091816	0.0864783
R-HSA-3928662	EPHB-mediated forward signaling	0.117266	0.108542	0.108135	0.112877	0.112287	0.117219	0.115185
R-HSA-418885	DCC mediated attractive signaling	0.113605	0.109454	0.0994159	0.114854	0.112807	0.119223	0.104111
R-HSA-392154	Nitric oxide stimulates guanylate cyclase	0.0184479	0.00866087	0.0118217	0.0275488	0.0321631	0.0220738	0.0287364
R-HSA-418346	Platelet homeostasis	0.0813056	0.0713062	0.0762368	0.0781392	0.0803796	0.0824776	0.0815963
R-HSA-418457	cGMP effects	-0.125118	-0.140578	-0.132657	-0.132104	-0.11779	-0.11867	-0.114108
R-HSA-1592230	Mitochondrial biogenesis	0.131068	0.134831	0.132322	0.137435	0.132392	0.132681	0.130743
R-HSA-163282	Mitochondrial transcription initiation	0.167707	0.17928	0.198649	0.166871	0.169962	0.17599	0.160698
R-HSA-2151201	Transcriptional activation of mitochondrial biogenesis	0.141671	0.146484	0.144331	0.149818	0.142634	0.144557	0.14322
R-HSA-75944	Transcription from mitochondrial promoters	0.14122	0.148287	0.166202	0.135022	0.147793	0.147874	0.13488
R-HSA-165159	MTOR signalling	0.141583	0.137993	0.127087	0.142067	0.130106	0.13952	0.130466
R-HSA-166208	mTORC1-mediated signalling	0.139329	0.135059	0.129122	0.141846	0.125743	0.138596	0.130269
R-HSA-380108	Chemokine receptors bind chemokines	0.0747394	0.0754139	0.0700862	0.055083	0.0563919	0.0486804	0.0659459
R-HSA-3214815	HDACs deacetylate histones	0.131504	0.132643	0.148661	0.138441	0.129752	0.131064	0.127116
R-HSA-427413	NoRC negatively regulates rRNA expression	0.149126	0.152955	0.168668	0.15491	0.149613	0.15376	0.139183
R-HSA-5250941	Negative epigenetic regulation of rRNA expression	0.138581	0.142202	0.15497	0.144749	0.140547	0.143642	0.131536
R-HSA-428359	Insulin-like Growth Factor-2 mRNA Binding Proteins (IGF2BPs/IMPs/VICKZs) bind RNA	0.280997	0.282739	0.25931	0.274373	0.260408	0.297673	0.2754
R-HSA-1660514	Synthesis of PIPs at the Golgi membrane	0.133051	0.1221	0.134431	0.123853	0.128563	0.116152	0.110307
R-HSA-1660516	Synthesis of PIPs at the early endosome membrane	0.100281	0.0773924	0.0753167	0.091929	0.0940476	0.0717488	0.0575638
R-HSA-1660517	Synthesis of PIPs at the late endosome membrane	0.0582281	0.0547868	0.039446	0.065324	0.0583574	0.0498416	0.0410415
R-HSA-163685	Integration of energy metabolism	0.0921938	0.089607	0.0820466	0.0869391	0.0928615	0.0914304	0.0994429
R-HSA-422356	Regulation of insulin secretion	0.0927556	0.0920627	0.0823557	0.0870855	0.0936408	0.0933679	0.103825
R-HSA-109704	PI3K Cascade	0.0552361	0.0449882	0.0417284	0.0552036	0.0558045	0.0485403	0.0560228
R-HSA-112399	IRS-mediated signalling	0.0658155	0.0595359	0.057079	0.0657597	0.065419	0.0584776	0.0606149
R-HSA-114604	GPVI-mediated activation cascade	0.138178	0.123118	0.122792	0.133615	0.13356	0.137611	0.142858
R-HSA-1266695	Interleukin-7 signaling	0.154958	0.135807	0.148227	0.141019	0.14181	0.14258	0.151905
R-HSA-1433557	Signaling by SCF-KIT	0.11622	0.109337	0.108018	0.110113	0.106488	0.10999	0.120318
R-HSA-186763	Downstream signal transduction	0.0919605	0.0836542	0.0771916	0.0876272	0.0869823	0.0908868	0.0921913
R-HSA-198203	PI3K/AKT activation	0.135923	0.115976	0.106711	0.123106	0.119852	0.138616	0.139252
R-HSA-201556	Signaling by ALK	0.157167	0.147649	0.159788	0.156856	0.153521	0.160513	0.162351
R-HSA-210993	Tie2 Signaling	0.0884792	0.0775229	0.0725725	0.0817461	0.081266	0.0839965	0.0931166
R-HSA-2404192	Signaling by Type 1 Insulin-like Growth Factor 1 Receptor (IGF1R)	0.0715599	0.0639684	0.0618722	0.0688661	0.068918	0.0624766	0.0643975
R-HSA-2424491	DAP12 signaling	0.101444	0.0985957	0.0974848	0.107061	0.103422	0.110275	0.104792
R-HSA-2428924	IGF1R signaling cascade	0.0729631	0.065346	0.0629818	0.0702563	0.0702543	0.0637293	0.0653941
R-HSA-2428928	IRS-related events triggered by IGF1R	0.0733516	0.0651301	0.0628357	0.0704251	0.0704894	0.0641951	0.0656549
R-HSA-389356	CD28 co-stimulation	0.134294	0.12913	0.128407	0.135673	0.128252	0.13241	0.128565
R-HSA-389357	CD28 dependent PI3K/Akt signaling	0.16669	0.161656	0.160263	0.167414	0.158925	0.162264	0.15683
R-HSA-74751	Insulin receptor signalling cascade	0.0804178	0.0717842	0.0708946	0.077837	0.0793739	0.0719194	0.0748526
R-HSA-74752	Signaling by Insulin receptor	0.0816357	0.0721209	0.0712559	0.0780532	0.0819981	0.0741431	0.0777101
R-HSA-9696264	RND3 GTPase cycle	0.101041	0.0879365	0.0853694	0.0891315	0.0809243	0.100334	0.114105
R-HSA-9696273	RND1 GTPase cycle	0.0760179	0.0672295	0.067936	0.0706767	0.0678656	0.0820861	0.0958886
R-HSA-6811438	Intra-Golgi traffic	0.101009	0.101463	0.0746803	0.0987576	0.0943977	0.0881368	0.0928818
R-HSA-8853383	Lysosomal oligosaccharide catabolism	0.0734683	0.0513697	-0.040404	0.0685175	0.0423411	0.0456421	0.120416
R-HSA-1638091	Heparan sulfate/heparin (HS-GAG) metabolism	-0.0057003	-0.00565375	-0.0525929	-0.0234074	-0.0314068	-0.00747032	0.0164629
R-HSA-1793185	Chondroitin sulfate/dermatan sulfate metabolism	0.0163885	0.01192	-0.0259366	0.00104709	0.006355	0.0170736	0.0469782
R-HSA-196854	Metabolism of vitamins and cofactors	0.075859	0.0817022	0.0745872	0.0736915	0.0760502	0.0762475	0.080749
R-HSA-1971475	A tetrasaccharide linker sequence is required for GAG synthesis	-0.0218103	-0.020433	-0.0661378	-0.0394738	-0.0335144	-0.00753454	0.0035842
R-HSA-2022928	HS-GAG biosynthesis	-0.00754767	-0.0122506	-0.0654715	-0.033628	-0.0252636	-0.0306409	0.0279469
R-HSA-2024096	HS-GAG degradation	0.0412546	0.0466196	0.00118642	0.0245277	0.0186589	0.0315439	0.0516557
R-HSA-2187338	Visual phototransduction	0.0442479	0.0525511	0.0321961	0.0390986	0.041535	0.0481539	0.0630311
R-HSA-3000171	Non-integrin membrane-ECM interactions	0.0347327	0.0304462	0.0224255	0.0270564	0.0416423	0.0332728	0.054906
R-HSA-6806667	Metabolism of fat-soluble vitamins	0.0323358	0.0521216	0.0228431	0.0322871	0.0314011	0.0417509	0.0506581
R-HSA-975634	Retinoid metabolism and transport	0.0344875	0.056286	0.0165327	0.0361876	0.030606	0.0481958	0.0596418
R-HSA-5617472	Activation of anterior HOX genes in hindbrain development during early embryogenesis	0.115768	0.118096	0.119032	0.119761	0.111502	0.116629	0.114146
R-HSA-5619507	Activation of HOX genes during differentiation	0.115768	0.118096	0.119032	0.119761	0.111502	0.116629	0.114146
R-HSA-264876	Insulin processing	0.0879496	0.0952874	0.0785242	0.0880374	0.0876018	0.0865061	0.0866602
R-HSA-5620916	VxPx cargo-targeting to cilium	0.102001	0.104875	0.0979461	0.0963608	0.0944645	0.0981315	0.0908723
R-HSA-8851680	Butyrophilin (BTN) family interactions	0.0308142	0.0304947	0.0392079	0.0327265	0.0386133	0.0278223	0.0163921
R-HSA-186712	Regulation of beta-cell development	0.142404	0.142506	0.145816	0.145832	0.135961	0.13988	0.138113
R-HSA-210747	Regulation of gene expression in early pancreatic precursor cells	0.0745027	0.0815694	0.0692688	0.0888984	0.0955856	0.082578	0.0756804
R-HSA-383280	Nuclear Receptor transcription pathway	0.212932	0.214874	0.220347	0.217601	0.208994	0.211096	0.211646
R-HSA-4090294	SUMOylation of intracellular receptors	0.197294	0.198208	0.199277	0.200059	0.195573	0.193417	0.197401
R-HSA-5628897	TP53 Regulates Metabolic Genes	0.14388	0.14225	0.142268	0.144962	0.138824	0.147025	0.142619
R-HSA-5689901	Metalloprotease DUBs	0.179673	0.171478	0.200451	0.173861	0.176168	0.172964	0.168673
R-HSA-420029	Tight junction interactions	0.0310545	0.0391518	0.0225294	0.0311765	0.0414374	0.0381176	0.0335566
R-HSA-421270	Cell-cell junction organization	0.0388111	0.0427919	0.0390765	0.0430922	0.0378284	0.0438056	0.0374896
R-HSA-446728	Cell junction organization	0.0644661	0.061581	0.0656762	0.0622278	0.0646895	0.0641699	0.0604773
R-HSA-8935964	RUNX1 regulates expression of components of tight junctions	0.0848993	0.0701939	0.0645705	0.0512162	0.0647489	0.0647303	0.078571
R-HSA-2142753	Arachidonic acid metabolism	0.0342738	0.0376997	0.0203172	0.0147003	0.0204209	0.0413529	0.0967085
R-HSA-447041	CHL1 interactions	0.137458	0.129997	0.135525	0.15367	0.160115	0.144511	0.160216
R-HSA-6791226	Major pathway of rRNA processing in the nucleolus and cytosol	0.187545	0.190956	0.188325	0.186906	0.186842	0.182325	0.184282
R-HSA-72312	rRNA processing	0.180016	0.183708	0.18204	0.17845	0.18025	0.175388	0.17786
R-HSA-8868773	rRNA processing in the nucleus and cytosol	0.18733	0.191239	0.189511	0.186936	0.187108	0.181916	0.183807
R-HSA-9022702	MECP2 regulates transcription of neuronal ligands	0.155137	0.157975	0.152207	0.169411	0.154458	0.168791	0.157689
R-HSA-3928664	Ephrin signaling	0.112456	0.110051	0.113499	0.110477	0.114794	0.111459	0.101407
R-HSA-447043	Neurofascin interactions	0.112408	0.114342	0.123388	0.109898	0.116609	0.115092	0.107001
R-HSA-1483206	Glycerophospholipid biosynthesis	0.0638663	0.0680792	0.0584301	0.062023	0.0633792	0.0689899	0.0846548
R-HSA-1483226	Synthesis of PI	-0.0175169	0.00756306	-0.00199183	-0.0096096	-0.0341534	0.00113785	-0.0206661
R-HSA-6790901	rRNA modification in the nucleus and cytosol	0.162798	0.177807	0.167896	0.164073	0.171471	0.154985	0.146396
R-HSA-390471	Association of TriC/CCT with target proteins during biosynthesis	0.141005	0.136505	0.149895	0.139215	0.132907	0.138776	0.141464
R-HSA-1912420	Pre-NOTCH Processing in Golgi	0.166304	0.167678	0.158895	0.167403	0.162485	0.178605	0.185626
R-HSA-1912422	Pre-NOTCH Expression and Processing	0.156539	0.154489	0.172087	0.160348	0.152819	0.15855	0.153681
R-HSA-9603798	Class I peroxisomal membrane protein import	0.0568667	0.0508324	0.0587733	0.0506296	0.0721578	0.0411651	0.0528108
R-HSA-8935690	Digestion	-0.125453	-0.112411	-0.114356	-0.121886	-0.13855	-0.118165	-0.13402
R-HSA-8963743	Digestion and absorption	0.0110618	0.00121479	0.0170969	0.00990625	-0.00892296	-0.004385	-0.00784385
R-HSA-6783783	Interleukin-10 signaling	0.087562	0.0668502	0.0667669	0.0580655	0.0663468	0.0675355	0.101513
R-HSA-525793	Myogenesis	0.101356	0.098935	0.0996494	0.105127	0.0956381	0.0997726	0.0890833
R-HSA-877300	Interferon gamma signaling	0.174395	0.171521	0.177557	0.172811	0.175882	0.175054	0.170057
R-HSA-73980	RNA Polymerase III Transcription Termination	0.105838	0.123242	0.112994	0.115951	0.106072	0.116159	0.0963896
R-HSA-1912408	Pre-NOTCH Transcription and Translation	0.15776	0.155792	0.174932	0.162196	0.153931	0.159551	0.152267
R-HSA-2559585	Oncogene Induced Senescence	0.174476	0.16962	0.182244	0.174877	0.169739	0.176979	0.171104
R-HSA-68689	CDC6 association with the ORC:origin complex	0.0128544	0.00453649	0.150813	0.00524588	0.00505036	-0.0026408	-0.0227392
R-HSA-68911	G2 Phase	0.0844816	0.0720931	0.167253	0.0808646	0.0809765	0.0695805	0.0785377
R-HSA-69231	Cyclin D associated events in G1	0.132352	0.126812	0.142853	0.13129	0.129029	0.129303	0.123325
R-HSA-69236	G1 Phase	0.132352	0.126812	0.142853	0.13129	0.129029	0.129303	0.123325
R-HSA-157579	Telomere Maintenance	0.140169	0.140097	0.177193	0.136865	0.142442	0.134113	0.130625
R-HSA-171319	Telomere Extension By Telomerase	0.146652	0.146197	0.177129	0.141686	0.150447	0.145274	0.140135
R-HSA-180786	Extension of Telomeres	0.137311	0.13502	0.178367	0.128843	0.141102	0.130569	0.13169
R-HSA-204005	COPII-mediated vesicle transport	0.072008	0.0806829	0.0743749	0.0758557	0.0729272	0.0716937	0.0679605
R-HSA-3238698	WNT ligand biogenesis and trafficking	-0.0527112	-0.0372873	-0.0644976	-0.0544309	-0.0588261	-0.0615696	-0.032892
R-HSA-499943	Interconversion of nucleotide di- and triphosphates	0.13189	0.135751	0.169899	0.129148	0.14433	0.133129	0.141984
R-HSA-70263	Gluconeogenesis	0.0897265	0.0825688	0.118228	0.0743364	0.105267	0.0874833	0.0991766
R-HSA-141405	Inhibition of the proteolytic activity of APC/C required for the onset of anaphase by mitotic spindle checkpoint components	0.0955069	0.0857912	0.194977	0.0923089	0.100002	0.0839266	0.0917559
R-HSA-141430	Inactivation of APC/C via direct inhibition of the APC/C complex	0.0955069	0.0857912	0.194977	0.0923089	0.100002	0.0839266	0.0917559
R-HSA-174048	APC/C:Cdc20 mediated degradation of Cyclin B	0.154608	0.15166	0.206981	0.150329	0.156588	0.145115	0.150405
R-HSA-176407	Conversion from APC/C:Cdc20 to APC/C:Cdh1 in late anaphase	0.0564687	0.0565205	0.181987	0.0606582	0.0723935	0.0506847	0.060222
R-HSA-176412	Phosphorylation of the APC/C	0.0884186	0.0831895	0.188407	0.0861712	0.0941929	0.0722174	0.0839271
R-HSA-179409	APC-Cdc20 mediated degradation of Nek2A	0.162383	0.155973	0.198432	0.15696	0.160064	0.151905	0.153028
R-HSA-2559582	Senescence-Associated Secretory Phenotype (SASP)	0.146544	0.140905	0.164161	0.141791	0.141354	0.138361	0.142854
R-HSA-8853884	Transcriptional Regulation by VENTX	0.126941	0.125351	0.138565	0.128452	0.116928	0.128952	0.133362
R-HSA-163765	ChREBP activates metabolic gene expression	0.0727478	0.104291	0.112716	0.0731686	0.0901827	0.0859905	0.104583
R-HSA-1655829	Regulation of cholesterol biosynthesis by SREBP (SREBF)	0.117836	0.125563	0.125056	0.125253	0.118814	0.125056	0.120421
R-HSA-196780	Biotin transport and metabolism	-0.038312	0.00960408	-0.00847045	-0.0271188	-0.00947276	0.00131362	-0.00604142
R-HSA-196849	Metabolism of water-soluble vitamins and cofactors	0.0317281	0.042427	0.04093	0.0257316	0.0351845	0.0333025	0.0429073
R-HSA-200425	Carnitine metabolism	0.0646258	0.0610993	0.0469335	0.0660357	0.0653035	0.0743026	0.0709102
R-HSA-2426168	Activation of gene expression by SREBF (SREBP)	0.118094	0.127336	0.123675	0.124364	0.120838	0.127564	0.12614
R-HSA-964975	Vitamins B6 activation to pyridoxal phosphate	0.209204	0.263444	0.26298	0.222673	0.248989	0.235433	0.265004
R-HSA-9024446	NR1H2 and NR1H3-mediated signaling	0.0926295	0.106756	0.0894251	0.104194	0.092614	0.1023	0.101706
R-HSA-9029558	NR1H2 & NR1H3 regulate gene expression linked to lipogenesis	0.0738432	0.0870645	0.0555978	0.0833293	0.0649791	0.0876509	0.0931113
R-HSA-6794361	Neurexins and neuroligins	0.073642	0.0863904	0.0694633	0.0890599	0.0818066	0.0814747	0.0805673
R-HSA-6794362	Protein-protein interactions at synapses	0.0673823	0.0774025	0.0661128	0.0804764	0.0733569	0.0741635	0.0755142
R-HSA-1433559	Regulation of KIT signaling	0.128598	0.117492	0.115751	0.1233	0.124576	0.134592	0.142433
R-HSA-1660661	Sphingolipid de novo biosynthesis	0.0338199	0.0489086	0.0306413	0.0313721	0.0483223	0.0403021	0.0667955
R-HSA-3214858	RMTs methylate histone arginines	0.149729	0.146636	0.168488	0.150801	0.145864	0.142344	0.133609
R-HSA-9607240	FLT3 Signaling	0.153429	0.14784	0.146939	0.151739	0.143716	0.150036	0.147817
R-HSA-9706369	Negative regulation of FLT3	0.178609	0.170046	0.162117	0.172805	0.170925	0.174374	0.172189
R-HSA-982772	Growth hormone receptor signaling	0.122673	0.109069	0.109468	0.11346	0.11605	0.11988	0.128085
R-HSA-1227986	Signaling by ERBB2	0.149056	0.142469	0.138197	0.142405	0.140697	0.14676	0.148731
R-HSA-1236394	Signaling by ERBB4	0.153523	0.155972	0.149001	0.155928	0.15194	0.159059	0.155576
R-HSA-1250196	SHC1 events in ERBB2 signaling	0.127076	0.124475	0.122325	0.120415	0.121415	0.130821	0.133471
R-HSA-1250342	PI3K events in ERBB4 signaling	0.0606052	0.0440632	0.0353653	0.0534717	0.0454984	0.0744582	0.0995723
R-HSA-1250347	SHC1 events in ERBB4 signaling	0.069106	0.0655519	0.0545743	0.0564128	0.0496745	0.0604396	0.0781817
R-HSA-1251985	Nuclear signaling by ERBB4	0.149448	0.155825	0.148417	0.156581	0.152025	0.159726	0.153445
R-HSA-1306955	GRB7 events in ERBB2 signaling	0.12696	0.127076	0.131847	0.140598	0.127099	0.161728	0.164774
R-HSA-1358803	Downregulation of ERBB2:ERBB3 signaling	0.193941	0.196696	0.189657	0.197109	0.185993	0.197185	0.191151
R-HSA-1963640	GRB2 events in ERBB2 signaling	0.141514	0.143311	0.138244	0.140421	0.137948	0.14841	0.146884
R-HSA-1963642	PI3K events in ERBB2 signaling	0.140561	0.137832	0.13285	0.137609	0.135588	0.147381	0.15017
R-HSA-6785631	ERBB2 Regulates Cell Motility	0.141377	0.138529	0.133407	0.137999	0.13661	0.149281	0.145442
R-HSA-8847993	ERBB2 Activates PTK6 Signaling	0.14142	0.141195	0.137557	0.140639	0.140547	0.150338	0.151929
R-HSA-8863795	Downregulation of ERBB2 signaling	0.162731	0.158676	0.154449	0.158054	0.153864	0.162114	0.162988
R-HSA-432030	Transport of glycerol from adipocytes to the liver by Aquaporins	-0.151827	-0.145262	-0.147033	-0.187378	-0.0844716	-0.160625	-0.0890014
R-HSA-432047	Passive transport by Aquaporins	0.00944948	0.00870675	-0.00282613	0.00507926	0.0186152	0.0128501	0.0526555
R-HSA-445717	Aquaporin-mediated transport	0.0817869	0.0776231	0.0759555	0.0725377	0.0901623	0.0827913	0.096273
R-HSA-71403	Citric acid cycle (TCA cycle)	0.15939	0.17764	0.215072	0.1631	0.183468	0.177982	0.160622
R-HSA-373755	Semaphorin interactions	0.10678	0.101029	0.107408	0.112254	0.11	0.119633	0.114962
R-HSA-399956	CRMPs in Sema3A signaling	0.100913	0.101896	0.117631	0.111585	0.111985	0.123706	0.104526
R-HSA-1059683	Interleukin-6 signaling	0.109919	0.103281	0.0957054	0.105566	0.0968666	0.102275	0.116628
R-HSA-2586552	Signaling by Leptin	0.096978	0.0842043	0.0847957	0.0852597	0.0877146	0.0829488	0.100496
R-HSA-6783589	Interleukin-6 family signaling	0.099631	0.0946684	0.0851117	0.0945211	0.087725	0.0921475	0.107357
R-HSA-877312	Regulation of IFNG signaling	0.0997199	0.088936	0.0851131	0.0982782	0.0992227	0.0957054	0.109978
R-HSA-8849474	PTK6 Activates STAT3	0.134927	0.130422	0.127231	0.136326	0.134275	0.129654	0.145937
R-HSA-8939242	RUNX1 regulates transcription of genes involved in differentiation of keratinocytes	0.0742153	0.071753	0.0519445	0.0656879	0.06098	0.0724628	0.0910383
R-HSA-909733	Interferon alpha/beta signaling	0.132738	0.129446	0.122202	0.130055	0.138745	0.128582	0.123245
R-HSA-912694	Regulation of IFNA signaling	0.0667949	0.0573651	0.050226	0.0628192	0.0721932	0.0663734	0.0753973
R-HSA-9674555	Signaling by CSF3 (G-CSF)	0.141616	0.133578	0.128061	0.138296	0.137303	0.142592	0.144753
R-HSA-9705462	Inactivation of CSF3 (G-CSF) signaling	0.176978	0.167518	0.161676	0.165729	0.1653	0.169092	0.172797
R-HSA-5625900	RHO GTPases activate CIT	0.141148	0.12808	0.159471	0.133213	0.137318	0.134073	0.119724
R-HSA-2022870	Chondroitin sulfate biosynthesis	0.00545346	-0.0160615	-0.0385283	-0.0271931	-0.0107466	0.0113241	0.0299617
R-HSA-2022923	Dermatan sulfate biosynthesis	-0.184068	-0.174405	-0.228742	-0.165591	-0.182477	-0.138629	-0.0825885
R-HSA-2024101	CS/DS degradation	0.00562708	-0.00425925	-0.0408235	-0.0128141	-0.00388988	0.0138064	0.0563736
R-HSA-381038	XBP1(S) activates chaperone genes	0.103802	0.103681	0.0962986	0.100588	0.0974565	0.100744	0.102866
R-HSA-381070	IRE1alpha activates chaperones	0.105861	0.106217	0.0988169	0.103591	0.0996475	0.105326	0.106748
R-HSA-3214842	HDMs demethylate histones	0.125599	0.12836	0.148633	0.134882	0.12307	0.123393	0.114922
R-HSA-1296041	Activation of G protein gated Potassium channels	0.0594542	0.0719033	0.0616088	0.0511012	0.0660076	0.0547016	0.0508232
R-HSA-1296059	G protein gated Potassium channels	0.0594542	0.0719033	0.0616088	0.0511012	0.0660076	0.0547016	0.0508232
R-HSA-1296065	Inwardly rectifying K+ channels	0.0508416	0.063601	0.0534818	0.0427559	0.0571877	0.0460359	0.0433376
R-HSA-202040	G-protein activation	0.0847515	0.0785617	0.0766564	0.0617155	0.0697144	0.0816015	0.0737435
R-HSA-381676	Glucagon-like Peptide-1 (GLP1) regulates insulin secretion	0.131494	0.124984	0.126665	0.124202	0.134699	0.133301	0.13519
R-HSA-392451	G beta:gamma signalling through PI3Kgamma	0.170733	0.171779	0.161744	0.169953	0.157014	0.166576	0.143164
R-HSA-392851	Prostacyclin signalling through prostacyclin receptor	0.103411	0.0988575	0.0986399	0.0848924	0.0930793	0.092917	0.0784935
R-HSA-397795	G-protein beta:gamma signalling	0.146468	0.14574	0.137553	0.146518	0.136206	0.140167	0.123969
R-HSA-400042	Adrenaline,noradrenaline inhibits insulin secretion	0.0560964	0.066097	0.0570653	0.0426943	0.0453041	0.0472041	0.0383711
R-HSA-4086398	Ca2+ pathway	0.110369	0.105694	0.0993715	0.10879	0.102793	0.108483	0.109417
R-HSA-418217	G beta:gamma signalling through PLC beta	0.0728426	0.0782294	0.0725622	0.0672854	0.0689037	0.0732882	0.0559515
R-HSA-418592	ADP signalling through P2Y purinoceptor 1	0.10003	0.0945553	0.0933241	0.0841212	0.0899618	0.0940055	0.0913724
R-HSA-420092	Glucagon-type ligand receptors	0.0637015	0.0700819	0.0538504	0.053604	0.0576918	0.0640351	0.0697437
R-HSA-428930	Thromboxane signalling through TP receptor	0.101786	0.105908	0.0959732	0.0838607	0.0865963	0.102013	0.0926967
R-HSA-432040	Vasopressin regulates renal water homeostasis via Aquaporins	0.0940906	0.0868349	0.0876254	0.0848346	0.100469	0.0932894	0.100975
R-HSA-451326	Activation of kainate receptors upon glutamate binding	0.079863	0.0778124	0.0783981	0.077173	0.0790038	0.0856344	0.0705222
R-HSA-500657	Presynaptic function of Kainate receptors	0.0728426	0.0782294	0.0725622	0.0672854	0.0689037	0.0732882	0.0559515
R-HSA-6814122	Cooperation of PDCL (PhLP1) and TRiC/CCT in G-protein beta folding	0.117859	0.118311	0.122502	0.109754	0.114168	0.110189	0.108547
R-HSA-8964315	G beta:gamma signalling through BTK	0.0968328	0.0975803	0.094047	0.0821391	0.0910355	0.0817787	0.0762744
R-HSA-8964616	G beta:gamma signalling through CDC42	0.103473	0.100773	0.0997503	0.0986452	0.0993424	0.0942154	0.0827301
R-HSA-997272	Inhibition of voltage gated Ca2+ channels via Gbeta/gamma subunits	0.0594542	0.0719033	0.0616088	0.0511012	0.0660076	0.0547016	0.0508232
R-HSA-199220	Vitamin B5 (pantothenate) metabolism	0.050689	0.0629797	0.0665972	0.0529695	0.0703267	0.0723477	0.0772921
R-HSA-201688	WNT mediated activation of DVL	0.0830012	0.0960205	0.0761239	0.0959518	0.0877654	0.0884886	0.0661852
R-HSA-4641262	Disassembly of the destruction complex and recruitment of AXIN to the membrane	0.0909064	0.094106	0.0799553	0.0981774	0.0847299	0.095937	0.0820812
R-HSA-5368598	Negative regulation of TCF-dependent signaling by DVL-interacting proteins	0.0867002	0.114459	0.0811944	0.107786	0.0970032	0.103218	0.0652815
R-HSA-2028269	Signaling by Hippo	0.10029	0.103822	0.0908014	0.107502	0.0932635	0.101731	0.0951972
R-HSA-5099900	WNT5A-dependent internalization of FZD4	0.130966	0.13288	0.126166	0.135266	0.136455	0.132421	0.135285
R-HSA-1299316	TWIK-releated acid-sensitive K+ channel (TASK)	0.492051	0.489493	0.489676	0.486843	0.485016	0.481361	0.475331
R-HSA-5694530	Cargo concentration in the ER	0.0515197	0.0698993	0.0443336	0.0552267	0.0424382	0.0579181	0.0601284
R-HSA-6811440	Retrograde transport at the Trans-Golgi-Network	0.108483	0.10933	0.0984082	0.107109	0.103388	0.10808	0.110987
R-HSA-177929	Signaling by EGFR	0.111198	0.107444	0.106266	0.10738	0.108464	0.111511	0.111764
R-HSA-3928665	EPH-ephrin mediated repulsion of cells	0.122183	0.115586	0.114528	0.118819	0.121382	0.12241	0.122551
R-HSA-9013700	NOTCH4 Activation and Transmission of Signal to the Nucleus	0.131508	0.123104	0.121591	0.123532	0.128899	0.125928	0.133662
R-HSA-196741	Cobalamin (Cbl, vitamin B12) transport and metabolism	-0.0071497	-0.00145438	-0.0129724	-0.022259	-0.0231827	-0.0119608	0.00290282
R-HSA-2162123	Synthesis of Prostaglandins (PG) and Thromboxanes (TX)	0.0656503	0.0554696	0.0507305	0.0380689	0.0469018	0.0771159	0.143182
R-HSA-3214841	PKMTs methylate histone lysines	0.15278	0.150866	0.15819	0.159454	0.148877	0.151253	0.150336
R-HSA-8936459	RUNX1 regulates genes involved in megakaryocyte differentiation and platelet function	0.140596	0.141302	0.149046	0.148643	0.138851	0.142461	0.136733
R-HSA-419771	Opsins	-0.0589249	-0.0788235	0.0461345	-0.098335	-0.0700983	-0.126484	-0.0957301
R-HSA-109606	Intrinsic Pathway for Apoptosis	0.134101	0.130687	0.137647	0.131949	0.127721	0.13309	0.133161
R-HSA-111458	Formation of apoptosome	0.123441	0.118933	0.126958	0.119941	0.129306	0.126711	0.125979
R-HSA-111459	Activation of caspases through apoptosome-mediated cleavage	0.143054	0.146413	0.153863	0.1456	0.147874	0.152877	0.152993
R-HSA-111461	Cytochrome c-mediated apoptotic response	0.136376	0.129509	0.136767	0.130798	0.139568	0.135712	0.1385
R-HSA-111463	SMAC (DIABLO) binds to IAPs	0.137413	0.140363	0.145468	0.136658	0.143615	0.145899	0.151995
R-HSA-111464	SMAC(DIABLO)-mediated dissociation of IAP:caspase complexes	0.137413	0.140363	0.145468	0.136658	0.143615	0.145899	0.151995
R-HSA-111469	SMAC, XIAP-regulated apoptotic response	0.133817	0.137099	0.141755	0.133002	0.14087	0.142128	0.148341
R-HSA-111471	Apoptotic factor-mediated response	0.140028	0.13124	0.135043	0.130896	0.139443	0.136354	0.139736
R-HSA-6803207	TP53 Regulates Transcription of Caspase Activators and Caspases	0.106689	0.100201	0.113461	0.102734	0.103992	0.109207	0.101676
R-HSA-9627069	Regulation of the apoptosome activity	0.123441	0.118933	0.126958	0.119941	0.129306	0.126711	0.125979
R-HSA-1483249	Inositol phosphate metabolism	0.0368205	0.0329011	0.0307052	0.0457893	0.0412273	0.0547446	0.0627706
R-HSA-1855183	Synthesis of IP2, IP, and Ins in the cytosol	0.051374	0.0591964	0.0432794	0.0596464	0.0429748	0.0411402	0.0574946
R-HSA-448424	Interleukin-17 signaling	0.164978	0.15815	0.158336	0.160238	0.16023	0.159795	0.156852
R-HSA-450294	MAP kinase activation	0.167107	0.160706	0.16073	0.163062	0.161904	0.162674	0.158393
R-HSA-450321	JNK (c-Jun kinases) phosphorylation and activation mediated by activated human TAK1	0.183754	0.177535	0.169551	0.174366	0.175661	0.179722	0.177588
R-HSA-192105	Synthesis of bile acids and bile salts	0.0557908	0.0552976	0.0493424	0.0579091	0.0582664	0.073895	0.0859499
R-HSA-193368	Synthesis of bile acids and bile salts via 7alpha-hydroxycholesterol	0.0481678	0.0467097	0.0439297	0.0490268	0.0532531	0.0690892	0.0842279
R-HSA-194068	Bile acid and bile salt metabolism	0.0805932	0.0831775	0.0761216	0.0781551	0.0834738	0.0876635	0.0928607
R-HSA-2046104	alpha-linolenic (omega3) and linoleic (omega6) acid metabolism	-0.00778746	-0.0135303	0.00995568	-0.0082665	0.00704019	0.0226642	0.0561355
R-HSA-2046106	alpha-linolenic acid (ALA) metabolism	-0.00778746	-0.0135303	0.00995568	-0.0082665	0.00704019	0.0226642	0.0561355
R-HSA-389887	Beta-oxidation of pristanoyl-CoA	-0.00483367	-0.0265997	-0.00597454	0.00472261	-0.0115681	0.0279661	0.0459485
R-HSA-390247	Beta-oxidation of very long chain fatty acids	0.00472936	0.0125246	-0.00946521	0.0166848	-0.00568131	0.021973	0.00366488
R-HSA-6804760	Regulation of TP53 Activity through Methylation	0.158501	0.154593	0.166026	0.158769	0.153575	0.1621	0.152254
R-HSA-2453902	The canonical retinoid cycle in rods (twilight vision)	-0.0253748	-0.0252393	-0.0294877	-0.0437264	-0.0232685	-0.0388688	-0.00700248
R-HSA-5693579	Homologous DNA Pairing and Strand Exchange	0.0929072	0.0932944	0.121901	0.092551	0.0930688	0.0930518	0.0873882
R-HSA-5693607	Processing of DNA double-strand break ends	0.126433	0.121147	0.147811	0.122435	0.12293	0.117988	0.11704
R-HSA-5693616	Presynaptic phase of homologous DNA pairing and strand exchange	0.091237	0.0912063	0.120595	0.0903523	0.0911566	0.0905964	0.0850611
R-HSA-69473	G2/M DNA damage checkpoint	0.118625	0.114235	0.135683	0.116525	0.114029	0.115504	0.113165
R-HSA-75035	Chk1/Chk2(Cds1) mediated inactivation of Cyclin B:Cdk1 complex	0.0974505	0.094747	0.123661	0.09695	0.0939094	0.0982175	0.0987343
R-HSA-2514856	The phototransduction cascade	0.102985	0.0954795	0.0911476	0.0881188	0.0952216	0.0931513	0.102038
R-HSA-2514859	Inactivation, recovery and regulation of the phototransduction cascade	0.105723	0.097325	0.0938916	0.0901356	0.0977812	0.0954563	0.104538
R-HSA-194306	Neurophilin interactions with VEGF and VEGFR	0.0374379	0.0243294	0.0249285	0.0378325	0.0501655	0.0571273	0.0840296
R-HSA-399954	Sema3A PAK dependent Axon repulsion	0.125015	0.117515	0.122183	0.129775	0.126488	0.134557	0.125829
R-HSA-399955	SEMA3A-Plexin repulsion signaling by inhibiting Integrin adhesion	0.140003	0.132939	0.134866	0.145477	0.144878	0.150285	0.134922
R-HSA-445144	Signal transduction by L1	0.14947	0.142668	0.143848	0.146854	0.150251	0.151473	0.154173
R-HSA-5676594	TNF receptor superfamily (TNFSF) members mediating non-canonical NF-kB pathway	0.102498	0.107112	0.098197	0.107854	0.1014	0.108655	0.0946743
R-HSA-9617828	FOXO-mediated transcription of cell cycle genes	0.135357	0.133712	0.138811	0.137434	0.128817	0.142744	0.146154
R-HSA-181429	Serotonin Neurotransmitter Release Cycle	0.0744352	0.0853926	0.0646434	0.0756213	0.0860165	0.0716415	0.0836349
R-HSA-181430	Norepinephrine Neurotransmitter Release Cycle	0.0715086	0.0825159	0.0624756	0.0738414	0.0840555	0.0693306	0.0857543
R-HSA-212676	Dopamine Neurotransmitter Release Cycle	0.0587786	0.0735268	0.046181	0.0639987	0.0683691	0.0563377	0.0644316
R-HSA-264642	Acetylcholine Neurotransmitter Release Cycle	0.0856917	0.0944012	0.0754846	0.0854424	0.0970295	0.0807854	0.0868813
R-HSA-1834949	Cytosolic sensors of pathogen-associated DNA	0.151036	0.150896	0.144838	0.153781	0.145206	0.149748	0.145059
R-HSA-73780	RNA Polymerase III Chain Elongation	0.107221	0.122849	0.115758	0.113634	0.108297	0.116161	0.0908047
R-HSA-375280	Amine ligand-binding receptors	0.0947231	0.104563	0.103494	0.117986	0.11368	0.103393	0.11413
R-HSA-5673000	RAF activation	0.139038	0.139049	0.136244	0.140452	0.133466	0.144917	0.136087
R-HSA-888590	GABA synthesis, release, reuptake and degradation	0.097957	0.097863	0.0886861	0.0964503	0.106431	0.0881704	0.104199
R-HSA-442742	CREB1 phosphorylation through NMDA receptor-mediated activation of RAS signaling	0.110044	0.104969	0.0974655	0.10538	0.108865	0.105411	0.0930092
R-HSA-442982	Ras activation upon Ca2+ influx through NMDA receptor	0.0856697	0.07978	0.0748639	0.0772187	0.0840597	0.0824772	0.0675578
R-HSA-389599	Alpha-oxidation of phytanate	0.116214	0.0766086	0.11007	0.0865421	0.138583	0.0807927	0.114882
R-HSA-400451	Free fatty acids regulate insulin secretion	-0.0417096	-0.026763	-0.0606326	-0.0408475	-0.0635554	0.0178182	0.0564595
R-HSA-400511	Synthesis, secretion, and inactivation of Glucose-dependent Insulinotropic Polypeptide (GIP)	0.0635636	0.0571291	0.0754396	0.0561829	0.0635414	0.0518859	0.0728886
R-HSA-434316	Fatty Acids bound to GPR40 (FFAR1) regulate insulin secretion	-0.0201223	0.0123682	-0.0620175	-0.0179015	-0.0743528	0.0718686	0.0843586
R-HSA-168643	Nucleotide-binding domain, leucine rich repeat containing receptor (NLR) signaling pathways	0.145333	0.142733	0.138349	0.145354	0.143116	0.145313	0.147043
R-HSA-622312	Inflammasomes	0.140568	0.141295	0.139513	0.145165	0.143196	0.147791	0.152083
R-HSA-844615	The AIM2 inflammasome	0.0549892	0.0460371	0.0260184	0.0371953	0.0533741	0.0378935	0.0371876
R-HSA-9708530	Regulation of BACH1 activity	0.168967	0.169142	0.171199	0.168466	0.165471	0.165096	0.148687
R-HSA-70895	Branched-chain amino acid catabolism	0.15411	0.131551	0.159767	0.128785	0.168314	0.136992	0.127096
R-HSA-3772470	Negative regulation of TCF-dependent signaling by WNT ligand antagonists	-0.11347	-0.125824	-0.162252	-0.135111	-0.158782	-0.112912	-0.121169
R-HSA-5666185	RHO GTPases Activate Rhotekin and Rhophilins	0.110651	0.0973355	0.0904862	0.104663	0.0997331	0.098522	0.0765273
R-HSA-1606322	ZBP1(DAI) mediated induction of type I IFNs	0.191449	0.190433	0.176854	0.19012	0.180161	0.184737	0.189955
R-HSA-168638	NOD1/2 Signaling Pathway	0.155414	0.150213	0.144618	0.150076	0.148634	0.149275	0.145393
R-HSA-168927	TICAM1, RIP1-mediated IKK complex recruitment	0.180096	0.178898	0.168273	0.174817	0.170585	0.1755	0.174731
R-HSA-1810476	RIP-mediated NFkB activation via ZBP1	0.195569	0.194062	0.181568	0.194613	0.184152	0.192035	0.200284
R-HSA-193639	p75NTR signals via NF-kB	0.183569	0.173327	0.165106	0.170941	0.171317	0.173427	0.179299
R-HSA-209543	p75NTR recruits signalling complexes	0.183513	0.169966	0.165091	0.164885	0.170207	0.169622	0.167557
R-HSA-209560	NF-kB is activated and signals survival	0.191624	0.181076	0.172056	0.177874	0.17837	0.181318	0.189073
R-HSA-445989	TAK1 activates NFkB by phosphorylation and activation of IKKs complex	0.169779	0.166761	0.162209	0.167643	0.165553	0.170125	0.176717
R-HSA-5357905	Regulation of TNFR1 signaling	0.144831	0.147575	0.138452	0.14729	0.144005	0.145369	0.143103
R-HSA-5357956	TNFR1-induced NFkappaB signaling pathway	0.145186	0.146898	0.137704	0.146781	0.144227	0.14507	0.143228
R-HSA-5684264	MAP3K8 (TPL2)-dependent MAPK1/3 activation	0.185367	0.184009	0.180084	0.184011	0.17963	0.181319	0.173736
R-HSA-75893	TNF signaling	0.143748	0.145473	0.136682	0.146084	0.143889	0.14384	0.144359
R-HSA-933542	TRAF6 mediated NF-kB activation	0.1354	0.137805	0.127539	0.138004	0.130707	0.140795	0.144314
R-HSA-933543	NF-kB activation through FADD/RIP-1 pathway mediated by caspase-8 and -10	0.208504	0.202864	0.195504	0.203733	0.202072	0.201618	0.195792
R-HSA-937039	IRAK1 recruits IKK complex	0.183509	0.180698	0.172599	0.173659	0.173038	0.178344	0.1776
R-HSA-975144	IRAK1 recruits IKK complex upon TLR7/8 or 9 stimulation	0.183509	0.180698	0.172599	0.173659	0.173038	0.178344	0.1776
R-HSA-1268020	Mitochondrial protein import	0.125699	0.137006	0.153587	0.12894	0.132216	0.131869	0.131171
R-HSA-3214847	HATs acetylate histones	0.130222	0.131713	0.139415	0.133472	0.124356	0.1265	0.119726
R-HSA-110313	Translesion synthesis by Y family DNA polymerases bypasses lesions on DNA template	0.156721	0.152639	0.170609	0.150968	0.156608	0.147989	0.14772
R-HSA-5656169	Termination of translesion DNA synthesis	0.173398	0.167626	0.191115	0.163448	0.174551	0.162033	0.164866
R-HSA-73893	DNA Damage Bypass	0.166722	0.162435	0.178459	0.161187	0.164844	0.156981	0.154703
R-HSA-936440	Negative regulators of DDX58/IFIH1 signaling	0.152728	0.150057	0.136136	0.149815	0.145436	0.144845	0.13918
R-HSA-3000170	Syndecan interactions	0.0519655	0.0458467	0.0404496	0.0437457	0.0612548	0.0500987	0.0776188
R-HSA-1483148	Synthesis of PG	0.0367735	0.0402297	0.0260952	0.021007	0.0358327	0.021024	0.0754271
R-HSA-1483166	Synthesis of PA	0.0189265	0.0375592	0.00776389	0.0290002	0.0231544	0.0298107	0.039133
R-HSA-179812	GRB2 events in EGFR signaling	0.139967	0.142405	0.137055	0.138092	0.137619	0.146499	0.146149
R-HSA-180292	GAB1 signalosome	0.134031	0.128659	0.126035	0.129067	0.132045	0.137146	0.140102
R-HSA-180336	SHC1 events in EGFR signaling	0.133938	0.133717	0.128465	0.129372	0.129273	0.13789	0.143239
R-HSA-182971	EGFR downregulation	0.115362	0.113844	0.111313	0.113335	0.112825	0.118032	0.116316
R-HSA-212718	EGFR interacts with phospholipase C-gamma	0.126634	0.12547	0.125005	0.125621	0.129141	0.141918	0.146034
R-HSA-9634638	Estrogen-dependent nuclear events downstream of ESR-membrane signaling	0.15204	0.149751	0.151585	0.150129	0.148836	0.150959	0.14564
R-HSA-3928663	EPHA-mediated growth cone collapse	0.10745	0.0984931	0.100208	0.109878	0.102543	0.119179	0.116522
R-HSA-400685	Sema4D in semaphorin signaling	0.134463	0.126679	0.122448	0.131386	0.129191	0.136712	0.12717
R-HSA-416572	Sema4D induced cell migration and growth-cone collapse	0.130341	0.118395	0.121382	0.130332	0.124669	0.143639	0.133384
R-HSA-445355	Smooth Muscle Contraction	0.0940714	0.0862383	0.0931109	0.0911622	0.10368	0.0956779	0.0911553
R-HSA-5625740	RHO GTPases activate PKNs	0.116908	0.115327	0.126778	0.118815	0.113762	0.115439	0.112413
R-HSA-5627117	RHO GTPases Activate ROCKs	0.148945	0.129943	0.147665	0.14267	0.147029	0.146934	0.139076
R-HSA-5627123	RHO GTPases activate PAKs	0.112681	0.109737	0.111306	0.115687	0.116355	0.112381	0.100232
R-HSA-6806834	Signaling by MET	0.105618	0.101388	0.0971235	0.104327	0.102174	0.106641	0.107744
R-HSA-6807004	Negative regulation of MET activity	0.108969	0.105925	0.100721	0.106242	0.104425	0.108338	0.105596
R-HSA-9706019	RHOBTB3 ATPase cycle	0.085764	0.0874418	0.0867081	0.0859932	0.0821897	0.0870776	0.0862464
R-HSA-6804114	TP53 Regulates Transcription of Genes Involved in G2 Cell Cycle Arrest	0.145531	0.137883	0.182177	0.142618	0.141223	0.14568	0.142059
R-HSA-8854521	Interaction between PHLDA1 and AURKA	0.122356	0.0950179	0.241634	0.114373	0.117694	0.103058	0.120702
R-HSA-193775	Synthesis of bile acids and bile salts via 24-hydroxycholesterol	-0.0804518	-0.0529072	-0.0536004	-0.0684717	-0.0336381	-0.0108054	0.00914722
R-HSA-2173788	Downregulation of TGF-beta receptor signaling	0.167719	0.168945	0.169127	0.167961	0.161964	0.170507	0.162466
R-HSA-2173789	TGF-beta receptor signaling activates SMADs	0.1753	0.175663	0.174787	0.176317	0.169379	0.178562	0.173152
R-HSA-450520	HuR (ELAVL1) binds and stabilizes mRNA	0.122232	0.117959	0.140024	0.113706	0.127788	0.118813	0.123952
R-HSA-69273	Cyclin A/B1/B2 associated events during G2/M transition	0.116626	0.113529	0.171831	0.121496	0.118349	0.11728	0.10694
R-HSA-418359	Reduction of cytosolic Ca++ levels	0.171826	0.155005	0.194708	0.158999	0.191743	0.1752	0.195323
R-HSA-418360	Platelet calcium homeostasis	0.109211	0.110528	0.11037	0.110746	0.120836	0.117192	0.128543
R-HSA-445095	Interaction between L1 and Ankyrins	0.0478359	0.0694086	0.0520388	0.0601726	0.04378	0.0550066	0.0631236
R-HSA-416700	Other semaphorin interactions	0.0432639	0.0379457	0.0416694	0.0700382	0.0719732	0.080871	0.100374
R-HSA-72163	mRNA Splicing - Major Pathway	0.19434	0.201594	0.199214	0.201898	0.195317	0.195886	0.185706
R-HSA-72172	mRNA Splicing	0.192972	0.200093	0.198257	0.200534	0.19409	0.19429	0.1847
R-HSA-73817	Purine ribonucleoside monophosphate biosynthesis	0.0624663	0.0707018	0.138488	0.0480551	0.0457718	0.0559714	0.0425901
R-HSA-8956320	Nucleobase biosynthesis	0.0752307	0.0769462	0.13364	0.0591721	0.0634406	0.0640337	0.0551736
R-HSA-6785470	tRNA processing in the mitochondrion	0.181633	0.22499	0.196841	0.171573	0.17499	0.168187	0.123328
R-HSA-6787450	tRNA modification in the mitochondrion	0.0601195	0.0637134	0.0634706	0.0548078	0.0600019	0.0558109	0.0544785
R-HSA-8868766	rRNA processing in the mitochondrion	0.10136	0.103501	0.0976358	0.0838206	0.107109	0.0995925	0.110019
R-HSA-198323	AKT phosphorylates targets in the cytosol	0.17243	0.171454	0.178547	0.16976	0.167194	0.176039	0.16674
R-HSA-430039	mRNA decay by 5' to 3' exoribonuclease	0.245479	0.24062	0.245861	0.249863	0.244884	0.234267	0.220367
R-HSA-174824	Plasma lipoprotein assembly, remodeling, and clearance	0.0870238	0.0900078	0.0743845	0.0888048	0.0890244	0.090391	0.0990861
R-HSA-8964038	LDL clearance	0.136387	0.13514	0.136315	0.140705	0.136641	0.128877	0.142382
R-HSA-8964043	Plasma lipoprotein clearance	0.0715754	0.0806526	0.0612039	0.0810881	0.0766699	0.0751414	0.0855459
R-HSA-389397	Orexin and neuropeptides FF and QRFP bind to their respective receptors	-0.108548	-0.125226	-0.125687	-0.0668897	-0.101045	-0.0738006	-0.071899
R-HSA-73762	RNA Polymerase I Transcription Initiation	0.134913	0.140476	0.143764	0.143745	0.135252	0.139897	0.127202
R-HSA-73772	RNA Polymerase I Promoter Escape	0.127766	0.134274	0.15538	0.131179	0.130478	0.129906	0.113241
R-HSA-73854	RNA Polymerase I Promoter Clearance	0.1351	0.137952	0.151044	0.141889	0.135902	0.137289	0.124732
R-HSA-73863	RNA Polymerase I Transcription Termination	0.116488	0.130269	0.125557	0.122104	0.119241	0.124708	0.111768
R-HSA-73864	RNA Polymerase I Transcription	0.133261	0.135851	0.148863	0.139294	0.133419	0.134306	0.124576
R-HSA-196299	Beta-catenin phosphorylation cascade	0.0983814	0.0963067	0.090084	0.104388	0.091602	0.104063	0.0873905
R-HSA-8931987	RUNX1 regulates estrogen receptor mediated transcription	0.229612	0.233914	0.237412	0.235468	0.227397	0.233477	0.226513
R-HSA-8939256	RUNX1 regulates transcription of genes involved in WNT signaling	0.244426	0.247474	0.251279	0.248299	0.240215	0.245196	0.238828
R-HSA-389957	Prefoldin mediated transfer of substrate to CCT/TriC	0.158092	0.166914	0.186654	0.164406	0.161248	0.15976	0.164797
R-HSA-71240	Tryptophan catabolism	-0.0300123	-0.0118557	-0.0117875	-0.0272244	-0.0131877	-0.0167695	-0.000444434
R-HSA-3000157	Laminin interactions	-0.0130302	-0.0187074	-0.0229371	-0.00237055	0.0163123	0.000395509	0.0394434
R-HSA-8874081	MET activates PTK2 signaling	0.0618701	0.0406432	0.0451185	0.0500017	0.06379	0.0677698	0.0818992
R-HSA-8875878	MET promotes cell motility	0.0931977	0.0817266	0.0722361	0.0913956	0.0905549	0.100451	0.106718
R-HSA-927802	Nonsense-Mediated Decay (NMD)	0.27203	0.273541	0.269436	0.276495	0.269583	0.269794	0.266539
R-HSA-975957	Nonsense Mediated Decay (NMD) enhanced by the Exon Junction Complex (EJC)	0.27203	0.273541	0.269436	0.276495	0.269583	0.269794	0.266539
R-HSA-5368286	Mitochondrial translation initiation	0.17215	0.175423	0.196177	0.156149	0.179353	0.159191	0.15884
R-HSA-5368287	Mitochondrial translation	0.157759	0.160859	0.1806	0.142633	0.164909	0.147311	0.147039
R-HSA-5389840	Mitochondrial translation elongation	0.194642	0.208128	0.230651	0.187233	0.20835	0.18914	0.178671
R-HSA-5419276	Mitochondrial translation termination	0.19901	0.209329	0.232514	0.188243	0.212984	0.193571	0.183148
R-HSA-112311	Neurotransmitter clearance	-0.0235809	-0.0189344	-0.0127873	-0.0252791	-0.0220483	-0.0272266	0.0127995
R-HSA-2161517	Abacavir transmembrane transport	-0.247936	-0.254219	-0.241637	-0.213806	-0.249372	-0.180009	-0.283816
R-HSA-2161522	Abacavir transport and metabolism	0.0536886	0.042487	0.0576858	0.0766615	0.0457939	0.087361	-0.0172213
R-HSA-425366	Transport of bile salts and organic acids, metal ions and amine compounds	0.0467994	0.0520562	0.0437838	0.0473839	0.0483854	0.0533377	0.0658349
R-HSA-442660	Na+/Cl- dependent neurotransmitter transporters	-0.0315348	-0.0419649	-0.0122534	-0.0544106	-0.0418546	-0.0622212	0.00277763
R-HSA-549127	Organic cation transport	0.0457328	0.0567025	0.016979	0.0304565	0.032051	0.0444382	0.0921557
R-HSA-549132	Organic cation/anion/zwitterion transport	0.0457328	0.0567025	0.016979	0.0304565	0.032051	0.0444382	0.0921557
R-HSA-167044	Signalling to RAS	0.117656	0.110484	0.103534	0.108212	0.10475	0.105684	0.115575
R-HSA-171007	p38MAPK events	0.149306	0.148973	0.148713	0.148753	0.140205	0.141864	0.14219
R-HSA-187687	Signalling to ERKs	0.131008	0.12546	0.114804	0.131193	0.123296	0.129315	0.130351
R-HSA-376172	DSCAM interactions	0.130253	0.124118	0.1243	0.128667	0.13179	0.125747	0.118753
R-HSA-390522	Striated Muscle Contraction	0.0634133	0.0587042	0.058018	0.0533197	0.0578042	0.0544456	0.0515742
R-HSA-2142770	Synthesis of 15-eicosatetraenoic acid derivatives	0.0632549	0.108509	0.0408736	0.0554375	0.0664113	0.117315	0.200413
R-HSA-446205	Synthesis of GDP-mannose	0.022887	0.0903963	0.0506642	0.0352146	0.0563389	0.030774	-0.0150158
R-HSA-5693554	Resolution of D-loop Structures through Synthesis-Dependent Strand Annealing (SDSA)	0.0890447	0.0875549	0.118051	0.0881091	0.0868062	0.086727	0.0788622
R-HSA-1222556	ROS and RNS production in phagocytes	0.10715	0.0998817	0.0968707	0.106364	0.114462	0.113439	0.124671
R-HSA-77387	Insulin receptor recycling	0.090714	0.0780897	0.074797	0.0839103	0.0934044	0.0861101	0.09086
R-HSA-917937	Iron uptake and transport	0.141543	0.13979	0.138403	0.137648	0.142926	0.141745	0.128561
R-HSA-917977	Transferrin endocytosis and recycling	0.0349961	0.0252172	0.025318	0.0337559	0.0486962	0.0384737	0.0483412
R-HSA-114452	Activation of BH3-only proteins	0.134389	0.132359	0.141097	0.13341	0.125028	0.135809	0.131273
R-HSA-139915	Activation of PUMA and translocation to mitochondria	0.142421	0.134838	0.163612	0.138062	0.134001	0.146696	0.136928
R-HSA-6803204	TP53 Regulates Transcription of Genes Involved in Cytochrome C Release	0.14648	0.137608	0.152216	0.139727	0.137724	0.14769	0.137266
R-HSA-6803205	TP53 regulates transcription of several additional cell death genes whose specific roles in p53-dependent apoptosis remain uncertain	0.129911	0.124644	0.141246	0.123658	0.117014	0.128638	0.128845
R-HSA-6804759	Regulation of TP53 Activity through Association with Co-factors	0.141517	0.145541	0.150496	0.144522	0.133153	0.149311	0.1409
R-HSA-1855204	Synthesis of IP3 and IP4 in the cytosol	0.0244392	0.0170965	0.0289615	0.0362697	0.0361783	0.0555446	0.06674
R-HSA-1368071	NR1D1 (REV-ERBA) represses gene expression	0.153137	0.168563	0.134529	0.162574	0.140034	0.169241	0.164008
R-HSA-193670	p75NTR negatively regulates cell cycle via SC1	0.153035	0.150088	0.156653	0.158287	0.153956	0.16068	0.160716
R-HSA-2122947	NOTCH1 Intracellular Domain Regulates Transcription	0.16361	0.163769	0.168722	0.168679	0.161666	0.166422	0.155596
R-HSA-350054	Notch-HLH transcription pathway	0.158835	0.158591	0.160711	0.165795	0.154904	0.163757	0.156744
R-HSA-8940973	RUNX2 regulates osteoblast differentiation	0.133941	0.129421	0.128201	0.134584	0.130721	0.138895	0.139119
R-HSA-8941326	RUNX2 regulates bone development	0.129927	0.126713	0.121862	0.133172	0.126994	0.136379	0.139969
R-HSA-9022692	Regulation of MECP2 expression and activity	0.150236	0.150252	0.155652	0.149719	0.150551	0.15017	0.148632
R-HSA-9029569	NR1H3 & NR1H2 regulate gene expression linked to cholesterol transport and efflux	0.101402	0.11446	0.103053	0.114705	0.103629	0.110605	0.106958
R-HSA-9701898	STAT3 nuclear events downstream of ALK signaling	0.165402	0.155563	0.164294	0.16604	0.160194	0.1642	0.167586
R-HSA-438066	Unblocking of NMDA receptors, glutamate binding and activation	0.0767771	0.0734715	0.0708219	0.0764444	0.081655	0.0802809	0.0658814
R-HSA-8849932	Synaptic adhesion-like molecules	0.0901223	0.0891762	0.103011	0.100618	0.0935692	0.101349	0.0906041
R-HSA-9617324	Negative regulation of NMDA receptor-mediated neuronal transmission	0.0800522	0.0764099	0.0730045	0.0797847	0.0848693	0.0822858	0.0698199
R-HSA-9620244	Long-term potentiation	0.0797667	0.0745697	0.0708552	0.0794076	0.0809486	0.0880471	0.0737224
R-HSA-210991	Basigin interactions	0.123112	0.114378	0.110087	0.119915	0.125889	0.126998	0.151715
R-HSA-433692	Proton-coupled monocarboxylate transport	0.186073	0.195	0.165744	0.186656	0.192444	0.216343	0.21221
R-HSA-425410	Metal ion SLC transporters	0.0331063	0.042557	0.0320892	0.0294166	0.024186	0.0358271	0.0491742
R-HSA-159418	Recycling of bile acids and salts	0.117572	0.11712	0.10745	0.110606	0.113214	0.108265	0.107296
R-HSA-1679131	Trafficking and processing of endosomal TLR	0.037775	0.0453601	0.0493685	0.023898	0.0325557	0.0321991	0.0392571
R-HSA-9013957	TLR3-mediated TICAM1-dependent programmed cell death	0.215961	0.200163	0.203804	0.206404	0.215682	0.193896	0.180528
R-HSA-9013973	TICAM1-dependent activation of IRF3/IRF7	0.184024	0.184765	0.173534	0.184197	0.175441	0.176128	0.167682
R-HSA-9014325	TICAM1,TRAF6-dependent induction of TAK1 complex	0.184823	0.175205	0.169959	0.172469	0.174242	0.178033	0.175312
R-HSA-912446	Meiotic recombination	0.100574	0.0943051	0.167068	0.0978549	0.100842	0.0930922	0.0809577
R-HSA-4085001	Sialic acid metabolism	0.0440624	0.0508432	0.029881	0.0483607	0.0440587	0.0547415	0.0784406
R-HSA-3322077	Glycogen synthesis	0.203275	0.197382	0.193411	0.195175	0.195619	0.194049	0.192569
R-HSA-70221	Glycogen breakdown (glycogenolysis)	0.0812364	0.052168	0.0590095	0.0639411	0.0891376	0.0533817	0.0729622
R-HSA-8982491	Glycogen metabolism	0.1838	0.17692	0.172035	0.175198	0.179123	0.173632	0.175031
R-HSA-1482788	Acyl chain remodelling of PC	0.051124	0.0553872	0.056736	0.043885	0.0520405	0.0599496	0.0515813
R-HSA-1482801	Acyl chain remodelling of PS	-0.0559143	-0.0297097	-0.0671546	-0.0286181	-0.0607588	-0.0443787	-0.0246241
R-HSA-1482839	Acyl chain remodelling of PE	0.0362315	0.0351547	0.0272893	0.030639	0.0321957	0.0324419	0.0315668
R-HSA-1482922	Acyl chain remodelling of PI	0.0238832	0.0402314	-0.0285028	0.00390559	0.00241682	0.00887734	0.0457507
R-HSA-1482925	Acyl chain remodelling of PG	-0.109472	-0.0682451	-0.111688	-0.0442579	-0.0977795	-0.0344753	-0.0556282
R-HSA-190236	Signaling by FGFR	0.137078	0.137681	0.134372	0.140556	0.136759	0.141661	0.137495
R-HSA-203927	MicroRNA (miRNA) biogenesis	0.170838	0.177925	0.180675	0.177176	0.167291	0.172308	0.160183
R-HSA-5601884	PIWI-interacting RNA (piRNA) biogenesis	0.130296	0.141353	0.1336	0.138499	0.130925	0.135322	0.11832
R-HSA-5654738	Signaling by FGFR2	0.141641	0.143009	0.139527	0.145454	0.141728	0.146179	0.141336
R-HSA-5696398	Nucleotide Excision Repair	0.16291	0.1645	0.173279	0.163952	0.163865	0.157964	0.150917
R-HSA-6781823	Formation of TC-NER Pre-Incision Complex	0.193281	0.200218	0.191845	0.198892	0.191317	0.194888	0.179709
R-HSA-6781827	Transcription-Coupled Nucleotide Excision Repair (TC-NER)	0.179757	0.183407	0.191663	0.180441	0.179679	0.177434	0.165643
R-HSA-6782135	Dual incision in TC-NER	0.177631	0.181423	0.18731	0.179128	0.176447	0.174936	0.162461
R-HSA-6782210	Gap-filling DNA repair synthesis and ligation in TC-NER	0.178271	0.182828	0.188846	0.179607	0.176882	0.175584	0.162
R-HSA-6803529	FGFR2 alternative splicing	0.187923	0.19624	0.194701	0.195835	0.187012	0.189923	0.179004
R-HSA-72165	mRNA Splicing - Minor Pathway	0.218031	0.228768	0.233397	0.227563	0.217128	0.221044	0.204845
R-HSA-9670095	Inhibition of DNA recombination at telomere	0.150618	0.154469	0.173372	0.149852	0.149411	0.149713	0.139445
R-HSA-190241	FGFR2 ligand binding and activation	-0.161832	-0.13962	-0.171336	-0.0967413	-0.16622	-0.117721	-0.202216
R-HSA-190242	FGFR1 ligand binding and activation	-0.0546411	-0.0607729	-0.0788166	-0.0479548	-0.070824	-0.0709651	-0.129797
R-HSA-190370	FGFR1b ligand binding and activation	-0.102111	-0.097639	-0.11301	-0.0859606	-0.112656	-0.145372	-0.155946
R-HSA-190377	FGFR2b ligand binding and activation	-0.144344	-0.122541	-0.141631	-0.0733422	-0.153984	-0.0840493	-0.172044
R-HSA-5654219	Phospholipase C-mediated cascade: FGFR1	-0.021926	-0.0356859	-0.0210149	-0.00361231	0.00792799	0.0392375	0.0529559
R-HSA-5654221	Phospholipase C-mediated cascade; FGFR2	-0.0390194	-0.0510032	-0.0377589	-0.0196017	-0.0096834	0.0213762	0.0320856
R-HSA-5654687	Downstream signaling of activated FGFR1	0.0351537	0.0298142	0.0290282	0.0346997	0.0397687	0.0414399	0.0500721
R-HSA-5654688	SHC-mediated cascade:FGFR1	0.0823598	0.0989822	0.0784495	0.0849407	0.0702359	0.0691198	0.0524346
R-HSA-5654689	PI-3K cascade:FGFR1	0.0583156	0.0319593	0.0377551	0.0480142	0.0598847	0.0464279	0.0659661
R-HSA-5654693	FRS-mediated FGFR1 signaling	0.00286428	0.00314527	0.000359476	0.00331532	0.00551292	0.00777459	0.00861554
R-HSA-5654695	PI-3K cascade:FGFR2	0.0489248	0.0228766	0.0275895	0.0386855	0.0510219	0.0367461	0.0539545
R-HSA-5654696	Downstream signaling of activated FGFR2	0.0323694	0.0275054	0.0266258	0.0324823	0.0374957	0.0392662	0.0473207
R-HSA-5654699	SHC-mediated cascade:FGFR2	0.0670822	0.0835328	0.0633022	0.070322	0.0561325	0.0548847	0.0375408
R-HSA-5654700	FRS-mediated FGFR2 signaling	-0.00220917	-0.00176849	-0.00467619	-0.00135412	0.000680112	0.0030634	0.00333522
R-HSA-5654726	Negative regulation of FGFR1 signaling	0.140654	0.13283	0.13053	0.138984	0.141373	0.138436	0.138287
R-HSA-5654727	Negative regulation of FGFR2 signaling	0.137308	0.130162	0.127619	0.136223	0.138281	0.134755	0.135981
R-HSA-5654736	Signaling by FGFR1	0.109779	0.104007	0.103289	0.107821	0.110458	0.111425	0.116045
R-HSA-5658623	FGFRL1 modulation of FGFR1 signaling	0.0649396	0.0562453	0.0538571	0.0541112	0.055006	0.0514154	0.0688629
R-HSA-110330	Recognition and association of DNA glycosylase with site containing an affected purine	0.140554	0.13785	0.176386	0.131318	0.138721	0.136372	0.131318
R-HSA-73884	Base Excision Repair	0.122242	0.119023	0.160158	0.115136	0.120623	0.117665	0.114906
R-HSA-73927	Depurination	0.140554	0.13785	0.176386	0.131318	0.138721	0.136372	0.131318
R-HSA-73929	Base-Excision Repair, AP Site Formation	0.134305	0.130881	0.16485	0.125046	0.129639	0.129459	0.128797
R-HSA-110328	Recognition and association of DNA glycosylase with site containing an affected pyrimidine	0.135365	0.132772	0.166742	0.126819	0.131237	0.130125	0.128484
R-HSA-110329	Cleavage of the damaged pyrimidine	0.135365	0.132772	0.166742	0.126819	0.131237	0.130125	0.128484
R-HSA-110331	Cleavage of the damaged purine	0.140554	0.13785	0.176386	0.131318	0.138721	0.136372	0.131318
R-HSA-110357	Displacement of DNA glycosylase by APEX1	0.146393	0.124062	0.139993	0.12776	0.123227	0.135519	0.15671
R-HSA-5649702	APEX1-Independent Resolution of AP Sites via the Single Nucleotide Replacement Pathway	0.0387268	0.0388728	0.0439879	0.0503697	0.0328941	0.0490063	0.0397895
R-HSA-73928	Depyrimidination	0.135365	0.132772	0.166742	0.126819	0.131237	0.130125	0.128484
R-HSA-73933	Resolution of Abasic Sites (AP sites)	0.102834	0.0977081	0.144002	0.0970771	0.101906	0.0982387	0.0973206
R-HSA-196791	Vitamin D (calciferol) metabolism	0.107706	0.0992229	0.0989472	0.103622	0.10156	0.0920431	0.0948019
R-HSA-211916	Vitamins	-0.211544	-0.237743	-0.206589	-0.268554	-0.171371	-0.289309	-0.264801
R-HSA-165158	Activation of AKT2	0.0513626	0.0513035	0.0631925	0.0620982	0.0495118	0.0440468	0.0314503
R-HSA-354192	Integrin signaling	0.111867	0.108415	0.096425	0.120299	0.102908	0.124814	0.123826
R-HSA-444257	RSK activation	0.177451	0.162052	0.168334	0.175483	0.185983	0.177189	0.157681
R-HSA-5218920	VEGFR2 mediated vascular permeability	0.124196	0.116712	0.120276	0.12495	0.117122	0.119238	0.113072
R-HSA-5218921	VEGFR2 mediated cell proliferation	0.0810535	0.0734583	0.0782133	0.0788901	0.0828654	0.0942734	0.102934
R-HSA-76009	Platelet Aggregation (Plug Formation)	0.113126	0.10685	0.0990226	0.119392	0.106148	0.125866	0.128637
R-HSA-9634635	Estrogen-stimulated signaling through PRKCZ	0.167416	0.165647	0.162152	0.171097	0.163181	0.161158	0.15086
R-HSA-983170	Antigen Presentation: Folding, assembly and peptide loading of class I MHC	0.145191	0.142632	0.151983	0.148743	0.149427	0.152353	0.150309
R-HSA-9013508	NOTCH3 Intracellular Domain Regulates Transcription	0.147767	0.146777	0.146178	0.153684	0.139832	0.148197	0.151517
R-HSA-139853	Elevation of cytosolic Ca2+ levels	0.0615754	0.0775703	0.0466391	0.0746372	0.066567	0.0733348	0.0792744
R-HSA-844456	The NLRP3 inflammasome	0.135152	0.136619	0.135574	0.140999	0.138013	0.144419	0.148034
R-HSA-1296052	Ca2+ activated K+ channels	-0.157121	-0.141359	-0.150547	-0.181705	-0.154714	-0.162204	-0.082118
R-HSA-5221030	TET1,2,3 and TDG demethylate DNA	0.170825	0.142545	0.136665	0.137802	0.139259	0.159472	0.205924
R-HSA-416550	Sema4D mediated inhibition of cell attachment and migration	0.135561	0.122699	0.114092	0.12194	0.127738	0.122244	0.106129
R-HSA-427359	SIRT1 negatively regulates rRNA expression	0.119897	0.118595	0.146124	0.121384	0.119726	0.116564	0.11041
R-HSA-975576	N-glycan antennae elongation in the medial/trans-Golgi	0.0312308	0.0298033	-0.0112614	0.0209375	0.00852134	0.0427783	0.0574937
R-HSA-975577	N-Glycan antennae elongation	0.0608001	0.088795	0.0513955	0.104807	0.0849794	0.128991	0.150701
R-HSA-5365859	RA biosynthesis pathway	-0.0462974	-0.0318905	-0.041585	-0.0378754	-0.0302585	-0.0164663	0.0175499
R-HSA-8941237	Invadopodia formation	0.0967627	0.0366802	0.0653584	0.0264355	0.0296682	0.0410326	0.139662
R-HSA-450302	activated TAK1 mediates p38 MAPK activation	0.18483	0.178199	0.169572	0.17557	0.175701	0.17955	0.177991
R-HSA-937042	IRAK2 mediated activation of TAK1 complex	0.184796	0.174936	0.167937	0.169651	0.172084	0.176224	0.172373
R-HSA-212300	PRC2 methylates histones and DNA	0.146961	0.141264	0.175974	0.148612	0.139359	0.136144	0.126821
R-HSA-111457	Release of apoptotic factors from the mitochondria	0.148894	0.142252	0.126805	0.137519	0.14616	0.140393	0.149602
R-HSA-174362	Transport and synthesis of PAPS	0.147086	0.076733	0.136746	0.100145	0.165729	0.0889446	0.18676
R-HSA-2408522	Selenoamino acid metabolism	0.239653	0.238863	0.239758	0.236953	0.235544	0.235759	0.236923
R-HSA-2408550	Metabolism of ingested H2SeO4 and H2SeO3 into H2Se	0.114589	0.0733454	0.129994	0.0524627	0.102636	0.0801083	0.100817
R-HSA-70688	Proline catabolism	-0.0369244	-0.0513622	0.00371492	-0.0463502	-0.038261	-0.0260203	-0.0236943
R-HSA-6806942	MET Receptor Activation	-0.0251262	-0.0486501	-0.0715607	-0.084885	-0.0658849	-0.0659052	-0.0258946
R-HSA-8852405	Signaling by MST1	-0.0406669	-0.0315348	-0.0690203	-0.0936843	-0.0980799	-0.0508944	0.0578349
R-HSA-189085	Digestion of dietary carbohydrate	-0.0213552	-0.019445	-0.0215278	-0.0130094	-0.0378423	-0.0212332	-0.00324065
R-HSA-1638074	Keratan sulfate/keratin metabolism	0.0284127	0.024495	-0.00395002	0.0264082	0.0342492	0.0606575	0.0759512
R-HSA-2022854	Keratan sulfate biosynthesis	-0.0334673	-0.0342514	-0.0590306	-0.0253241	-0.00760242	0.0256599	0.015511
R-HSA-913709	O-linked glycosylation of mucins	-0.0511712	-0.0743179	-0.0679214	-0.0406573	-0.0323124	-0.0165617	-0.0166002
R-HSA-162791	Attachment of GPI anchor to uPAR	0.0709924	0.101073	0.0502799	0.0465315	0.0259088	0.0449828	0.0839366
R-HSA-418889	Caspase activation via Dependence Receptors in the absence of ligand	0.103156	0.111475	0.106328	0.113728	0.106992	0.104189	0.111596
R-HSA-428543	Inactivation of CDC42 and RAC1	0.140869	0.136178	0.139379	0.139605	0.148931	0.1367	0.118658
R-HSA-111931	PKA-mediated phosphorylation of CREB	0.129494	0.127942	0.11405	0.125333	0.136146	0.130368	0.14157
R-HSA-111933	Calmodulin induced events	0.103654	0.0996735	0.104989	0.0994531	0.107647	0.104231	0.10515
R-HSA-111996	Ca-dependent events	0.122533	0.116332	0.120759	0.117402	0.126424	0.120171	0.12061
R-HSA-111997	CaM pathway	0.103654	0.0996735	0.104989	0.0994531	0.107647	0.104231	0.10515
R-HSA-112043	PLC beta mediated events	0.117167	0.111373	0.113744	0.112766	0.118384	0.118299	0.119288
R-HSA-1489509	DAG and IP3 signaling	0.0946082	0.0883407	0.0944582	0.0932803	0.100863	0.104127	0.107613
R-HSA-163359	Glucagon signaling in metabolic regulation	0.105339	0.100541	0.100809	0.0941266	0.11301	0.108973	0.109218
R-HSA-163615	PKA activation	0.125672	0.113423	0.114632	0.112887	0.138094	0.127219	0.140805
R-HSA-164378	PKA activation in glucagon signalling	0.132863	0.121862	0.123356	0.121973	0.145622	0.138167	0.14877
R-HSA-170660	Adenylate cyclase activating pathway	-0.164551	-0.242593	-0.166657	-0.180307	-0.112724	-0.102549	-0.157946
R-HSA-1855167	Synthesis of pyrophosphates in the cytosol	0.138326	0.116298	0.116184	0.135955	0.128296	0.125066	0.122341
R-HSA-210746	Regulation of gene expression in endocrine-committed (NEUROG3+) progenitor cells	0.181905	0.138635	0.169483	0.143046	0.155145	0.179409	0.17562
R-HSA-9645460	Alpha-protein kinase 1 signaling pathway	0.184512	0.175521	0.170302	0.171054	0.17315	0.177147	0.17478
R-HSA-190239	FGFR3 ligand binding and activation	-0.267691	-0.248656	-0.275379	-0.201589	-0.293778	-0.242042	-0.234985
R-HSA-190322	FGFR4 ligand binding and activation	-0.270806	-0.253353	-0.27745	-0.232067	-0.29407	-0.299658	-0.301483
R-HSA-190372	FGFR3c ligand binding and activation	-0.267691	-0.248656	-0.275379	-0.201589	-0.293778	-0.242042	-0.234985
R-HSA-190375	FGFR2c ligand binding and activation	-0.232587	-0.226732	-0.254642	-0.211231	-0.249266	-0.281569	-0.287261
R-HSA-5654227	Phospholipase C-mediated cascade; FGFR3	-0.0499764	-0.0675337	-0.0479473	-0.0329515	-0.0197202	0.0140495	0.0321357
R-HSA-5654228	Phospholipase C-mediated cascade; FGFR4	-0.04835	-0.0662551	-0.0474099	-0.0327411	-0.0192266	0.014371	0.032111
R-HSA-5654704	SHC-mediated cascade:FGFR3	0.0654792	0.0806689	0.062039	0.0670471	0.0531012	0.0515633	0.0378555
R-HSA-5654706	FRS-mediated FGFR3 signaling	-0.0042497	-0.00490494	-0.00662846	-0.0044378	-0.00167295	0.000651333	0.00279466
R-HSA-5654708	Downstream signaling of activated FGFR3	0.0314455	0.0257901	0.025734	0.0309081	0.0364026	0.0381335	0.0475418
R-HSA-5654710	PI-3K cascade:FGFR3	0.0477816	0.019747	0.027252	0.0366324	0.0494424	0.0358156	0.0574371
R-HSA-5654712	FRS-mediated FGFR4 signaling	-0.00387402	-0.00465112	-0.00650917	-0.0044511	-0.00155013	0.000743387	0.00277909
R-HSA-5654716	Downstream signaling of activated FGFR4	0.0316817	0.0259409	0.0258046	0.0308347	0.0364792	0.0381931	0.0475382
R-HSA-5654719	SHC-mediated cascade:FGFR4	0.0662235	0.0809905	0.0622264	0.0664635	0.0533608	0.0517749	0.0378414
R-HSA-5654720	PI-3K cascade:FGFR4	0.0482705	0.0200838	0.0274027	0.0364191	0.0496018	0.0359463	0.0574356
R-HSA-5654732	Negative regulation of FGFR3 signaling	0.137652	0.130075	0.127994	0.13631	0.138507	0.134924	0.136921
R-HSA-5654733	Negative regulation of FGFR4 signaling	0.137762	0.130115	0.128014	0.136131	0.138543	0.134957	0.136928
R-HSA-5654741	Signaling by FGFR3	0.110722	0.10594	0.104189	0.110587	0.111739	0.114276	0.11881
R-HSA-5654743	Signaling by FGFR4	0.111367	0.106483	0.104863	0.110481	0.112501	0.114112	0.118577
R-HSA-5632681	Ligand-receptor interactions	-0.183887	-0.158195	-0.0704337	-0.124149	-0.165292	-0.114269	-0.165114
R-HSA-9690406	Transcriptional regulation of testis differentiation	0.055381	0.0470078	0.0568222	0.0626762	0.0465351	0.0649811	0.0604018
R-HSA-379716	Cytosolic tRNA aminoacylation	0.113275	0.107732	0.118522	0.105419	0.106688	0.110345	0.10179
R-HSA-379724	tRNA Aminoacylation	0.0632104	0.0704465	0.0681181	0.0648026	0.0641064	0.0705727	0.0517978
R-HSA-5689896	Ovarian tumor domain proteases	0.179458	0.177793	0.18369	0.178186	0.175122	0.177488	0.170941
R-HSA-9013418	RHOBTB2 GTPase cycle	0.153516	0.151613	0.152004	0.15508	0.150941	0.156655	0.160702
R-HSA-9013422	RHOBTB1 GTPase cycle	0.160708	0.160599	0.162181	0.159813	0.156379	0.16352	0.154814
R-HSA-9706574	RHOBTB GTPase Cycle	0.143704	0.140143	0.14245	0.142655	0.140719	0.1459	0.146063
R-HSA-1296072	Voltage gated Potassium channels	-0.124188	-0.113716	-0.14295	-0.132707	-0.130811	-0.137492	-0.118024
R-HSA-381033	ATF6 (ATF6-alpha) activates chaperones	0.127887	0.126064	0.137278	0.126684	0.130391	0.129224	0.133253
R-HSA-8874211	CREB3 factors activate genes	0.0764304	0.0837526	0.069765	0.0694051	0.0795988	0.074127	0.0842095
R-HSA-8963889	Assembly of active LPL and LIPC lipase complexes	0.0667127	0.0660265	0.0475785	0.0517609	0.0563352	0.051485	0.0473077
R-HSA-8963899	Plasma lipoprotein remodeling	0.0367558	0.0486135	0.0214641	0.034138	0.0317563	0.0357164	0.0376026
R-HSA-422085	Synthesis, secretion, and deacylation of Ghrelin	0.00849799	-0.00903058	0.018969	0.00255484	0.00268704	-0.00699827	0.0120655
R-HSA-452723	Transcriptional regulation of pluripotent stem cells	0.0806091	0.0815643	0.0768639	0.0883299	0.0809272	0.0818593	0.102063
R-HSA-380972	Energy dependent regulation of mTOR by LKB1-AMPK	0.110829	0.104402	0.0928268	0.109467	0.108164	0.115361	0.109372
R-HSA-2534343	Interaction With Cumulus Cells And The Zona Pellucida	-0.0824109	-0.099025	-0.0937464	-0.0709774	-0.10067	-0.0856231	-0.0862058
R-HSA-427601	Multifunctional anion exchangers	0.0792458	0.033482	0.000432466	0.0533357	0.0662257	0.00918971	0.182984
R-HSA-111446	Activation of BIM and translocation to mitochondria	0.166858	0.152963	0.140501	0.167506	0.157543	0.166157	0.161624
R-HSA-111453	BH3-only proteins associate with and inactivate anti-apoptotic BCL-2 members	0.158143	0.157829	0.15039	0.151803	0.153234	0.148928	0.161549
R-HSA-8952158	RUNX3 regulates BCL2L11 (BIM) transcription	0.166625	0.169208	0.137643	0.178651	0.157802	0.186542	0.178416
R-HSA-9614657	FOXO-mediated transcription of cell death genes	0.155449	0.14767	0.148685	0.152075	0.1503	0.150009	0.139199
R-HSA-9617629	Regulation of FOXO transcriptional activity by acetylation	0.159005	0.15921	0.162153	0.160328	0.156409	0.16233	0.147815
R-HSA-975578	Reactions specific to the complex N-glycan synthesis pathway	0.0190856	-0.00850479	-0.0553554	-0.0374874	-0.0382794	-0.0110365	-0.00777987
R-HSA-375281	Hormone ligand-binding receptors	0.0754063	-0.00442207	0.0238373	-0.0464591	-0.000472183	-0.0447972	0.0282655
R-HSA-9006115	Signaling by NTRK2 (TRKB)	0.0814527	0.0770894	0.0802871	0.0786802	0.0827206	0.0860229	0.0881372
R-HSA-9028731	Activated NTRK2 signals through FRS2 and FRS3	0.0106133	0.00757062	0.0092055	0.00651393	0.0118626	0.0155865	0.0185347
R-HSA-1475029	Reversible hydration of carbon dioxide	-0.0772693	-0.0747735	-0.0623459	-0.0493219	-0.0626435	-0.0415799	-0.106728
R-HSA-1295596	Spry regulation of FGF signaling	0.147583	0.140425	0.138381	0.146237	0.148788	0.146135	0.147785
R-HSA-74259	Purine catabolism	0.117125	0.131021	0.131895	0.110904	0.123532	0.116469	0.10339
R-HSA-8956319	Nucleobase catabolism	0.106989	0.114681	0.101922	0.0880354	0.104202	0.0985921	0.0791698
R-HSA-5620971	Pyroptosis	0.166765	0.158147	0.161275	0.155327	0.154245	0.162235	0.170024
R-HSA-428540	Activation of RAC1	0.0827681	0.0808461	0.0724359	0.0852096	0.0876152	0.0832936	0.0667983
R-HSA-8985801	Regulation of cortical dendrite branching	0.019114	0.0106749	0.00813014	0.0174485	0.0238449	0.0219463	0.00645389
R-HSA-8963684	Tyrosine catabolism	-0.0172742	-0.0857728	0.0506637	-0.12453	-0.0720399	-0.116492	-0.0536259
R-HSA-8963691	Phenylalanine and tyrosine metabolism	0.0307059	0.0128718	0.0458756	-0.0198547	0.0139349	0.00904707	0.0231183
R-HSA-163680	AMPK inhibits chREBP transcriptional activation activity	0.0806777	0.0709239	0.064773	0.0736224	0.0773511	0.0744268	0.082858
R-HSA-2151209	Activation of PPARGC1A (PGC-1alpha) by phosphorylation	0.0966428	0.0815822	0.0772376	0.091761	0.0953878	0.0937426	0.094223
R-HSA-9613354	Lipophagy	0.119844	0.108481	0.104092	0.11872	0.116517	0.113899	0.118285
R-HSA-164952	The role of Nef in HIV-1 replication and disease pathogenesis	0.159018	0.154216	0.151649	0.161455	0.16153	0.151333	0.153122
R-HSA-2465910	MASTL Facilitates Mitotic Progression	0.118393	0.123627	0.197375	0.121016	0.13042	0.122482	0.115111
R-HSA-75067	Processing of Capped Intronless Pre-mRNA	0.231801	0.226235	0.245729	0.229246	0.233088	0.224634	0.211932
R-HSA-77595	Processing of Intronless Pre-mRNAs	0.228816	0.225331	0.239521	0.237174	0.232612	0.23096	0.207581
R-HSA-2160916	Hyaluronan uptake and degradation	0.0928294	0.108774	0.133521	0.0765103	0.122069	0.115903	0.165686
R-HSA-9033658	Blood group systems biosynthesis	-0.0653122	-0.0670422	-0.0817654	-0.0661774	-0.0756348	-0.0656792	-0.0509192
R-HSA-9037629	Lewis blood group biosynthesis	-0.0391937	-0.0473637	-0.055522	-0.0426439	-0.049617	-0.0407453	-0.0231895
R-HSA-5607763	CLEC7A (Dectin-1) induces NFAT activation	0.179163	0.161855	0.157215	0.184589	0.183606	0.176438	0.183905
R-HSA-2214320	Anchoring fibril formation	0.0669699	0.0399999	0.0552916	0.0493419	0.0813798	0.0663392	0.0966396
R-HSA-2243919	Crosslinking of collagen fibrils	0.00838553	-0.00351885	0.00669793	0.0033712	0.0234118	0.0170802	0.0497247
R-HSA-111465	Apoptotic cleavage of cellular proteins	0.0980889	0.0944405	0.0974613	0.0959297	0.0901063	0.0956302	0.0989821
R-HSA-264870	Caspase-mediated cleavage of cytoskeletal proteins	0.0969165	0.0966927	0.0954145	0.0959497	0.0931409	0.0964226	0.0990588
R-HSA-113507	E2F-enabled inhibition of pre-replication complex formation	0.0197733	0.0166286	0.193862	0.00750994	0.0262512	0.0126772	0.0190385
R-HSA-113510	E2F mediated regulation of DNA replication	0.109204	0.101477	0.178111	0.107634	0.108256	0.107147	0.100774
R-HSA-68616	Assembly of the ORC complex at the origin of replication	-0.0953146	-0.102641	0.101731	-0.103019	-0.0967498	-0.0884033	-0.108597
R-HSA-194313	VEGF ligand-receptor interactions	0.0511214	0.038349	0.0300882	0.0468904	0.0608386	0.0692764	0.101772
R-HSA-195399	VEGF binds to VEGFR leading to receptor dimerization	0.0511214	0.038349	0.0300882	0.0468904	0.0608386	0.0692764	0.101772
R-HSA-5624958	ARL13B-mediated ciliary trafficking of INPP5E	0.0486816	0.0580882	0.0489107	0.0428658	0.0547349	0.0462889	0.0592638
R-HSA-9648002	RAS processing	0.17843	0.178073	0.170648	0.17341	0.173078	0.171915	0.173497
R-HSA-2468052	Establishment of Sister Chromatid Cohesion	0.160281	0.152431	0.267828	0.15168	0.14566	0.160945	0.163492
R-HSA-2470946	Cohesin Loading onto Chromatin	0.190769	0.180603	0.287635	0.17681	0.170124	0.183089	0.182428
R-HSA-68884	Mitotic Telophase/Cytokinesis	0.123972	0.111383	0.209649	0.116078	0.119208	0.107657	0.107259
R-HSA-9031528	NR1H2 & NR1H3 regulate gene expression linked to triglyceride lipolysis in adipose	0.089361	0.0845451	0.0604939	0.0946047	0.0721953	0.0963158	0.0824015
R-HSA-190371	FGFR3b ligand binding and activation	-0.387261	-0.337965	-0.413028	-0.286829	-0.390316	-0.322178	-0.381758
R-HSA-190373	FGFR1c ligand binding and activation	-0.119255	-0.140556	-0.146929	-0.129275	-0.151997	-0.147499	-0.196996
R-HSA-5205647	Mitophagy	0.177709	0.175409	0.169286	0.179698	0.174687	0.176963	0.179514
R-HSA-5205685	PINK1-PRKN Mediated Mitophagy	0.185543	0.181531	0.177416	0.184677	0.182431	0.182177	0.187568
R-HSA-5689877	Josephin domain DUBs	0.155528	0.153019	0.153548	0.153298	0.152214	0.148221	0.144405
R-HSA-9013419	RHOT2 GTPase cycle	0.116395	0.106144	0.0957142	0.108195	0.10056	0.100143	0.0599867
R-HSA-9013425	RHOT1 GTPase cycle	0.140447	0.131419	0.117866	0.13319	0.106497	0.117423	0.098464
R-HSA-9715370	Miro GTPase Cycle	0.105708	0.0963362	0.0811678	0.101778	0.0832339	0.092475	0.0611479
R-HSA-5625886	Activated PKN1 stimulates transcription of AR (androgen receptor) regulated genes KLK2 and KLK3	0.112332	0.113348	0.133734	0.115221	0.109602	0.107418	0.104479
R-HSA-4641263	Regulation of FZD by ubiquitination	0.167311	0.158523	0.152049	0.161034	0.1617	0.162024	0.162931
R-HSA-399719	Trafficking of AMPA receptors	0.0986463	0.104521	0.101307	0.104414	0.106607	0.104784	0.0940137
R-HSA-399721	Glutamate binding, activation of AMPA receptors and synaptic plasticity	0.0986463	0.104521	0.101307	0.104414	0.106607	0.104784	0.0940137
R-HSA-5682910	LGI-ADAM interactions	0.083947	0.0867737	0.0687045	0.0815691	0.0978834	0.0743398	0.0824422
R-HSA-210744	Regulation of gene expression in late stage (branching morphogenesis) pancreatic bud precursor cells	0.160926	0.160152	0.159835	0.168437	0.153913	0.164288	0.155979
R-HSA-2046105	Linoleic acid (LA) metabolism	-0.0365767	-0.0287522	-0.0226227	-0.0482433	-0.00868459	0.00626998	0.0434833
R-HSA-447038	NrCAM interactions	0.0461957	0.0368044	0.0450997	0.0430929	0.0441494	0.0440781	0.0298684
R-HSA-964739	N-glycan trimming and elongation in the cis-Golgi	0.179552	0.13606	0.170112	0.12607	0.192868	0.15384	0.141032
R-HSA-964827	Progressive trimming of alpha-1,2-linked mannose residues from Man9/8/7GlcNAc2 to produce Man5GlcNAc2	0.135031	0.111193	0.114433	0.0852233	0.13301	0.120858	0.113453
R-HSA-2892247	POU5F1 (OCT4), SOX2, NANOG activate genes related to proliferation	0.0928956	0.0886742	0.0958698	0.0954875	0.0898608	0.0796616	0.0914169
R-HSA-434313	Intracellular metabolism of fatty acids regulates insulin secretion	-0.0639561	-0.0690533	-0.0589954	-0.0650531	-0.0519776	-0.0412864	0.0271585
R-HSA-8964011	HDL clearance	0.0319634	0.0494651	0.0126819	0.0362286	0.0410196	0.036998	0.0633788
R-HSA-163841	Gamma carboxylation, hypusine formation and arylsulfatase activation	0.0270014	0.0351859	0.0249115	0.0200162	0.022338	0.0397026	0.0547721
R-HSA-156588	Glucuronidation	0.209344	0.109899	0.137055	0.106633	0.174212	0.0996261	0.116617
R-HSA-9613829	Chaperone Mediated Autophagy	0.11375	0.115878	0.108169	0.115377	0.111111	0.115731	0.117337
R-HSA-5685938	HDR through Single Strand Annealing (SSA)	0.0979443	0.0983767	0.12249	0.0959915	0.0972344	0.0968982	0.0901377
R-HSA-110312	Translesion synthesis by REV1	0.165511	0.158169	0.189261	0.157032	0.166063	0.156556	0.151508
R-HSA-5655862	Translesion synthesis by POLK	0.166123	0.158189	0.189315	0.157262	0.166767	0.156433	0.152274
R-HSA-5656121	Translesion synthesis by POLI	0.163882	0.157814	0.188272	0.156222	0.165927	0.156101	0.151413
R-HSA-110056	MAPK3 (ERK1) activation	0.0834027	0.0699552	0.112546	0.0653091	0.0750747	0.067579	0.0853917
R-HSA-112409	RAF-independent MAPK1/3 activation	0.122905	0.112699	0.138679	0.11081	0.118771	0.110774	0.120288
R-HSA-112411	MAPK1 (ERK2) activation	0.135605	0.123637	0.111812	0.123563	0.127109	0.124251	0.125293
R-HSA-1170546	Prolactin receptor signaling	0.109532	0.0977146	0.105294	0.101083	0.105364	0.0979588	0.0863676
R-HSA-6788467	IL-6-type cytokine receptor ligand interactions	0.0730941	0.0759974	0.0372061	0.0514105	0.042162	0.0576395	0.102092
R-HSA-8854691	Interleukin-20 family signaling	0.101369	0.0921374	0.0890941	0.0849196	0.089268	0.0857889	0.0900738
R-HSA-8984722	Interleukin-35 Signalling	0.134726	0.12268	0.120174	0.118586	0.111146	0.119206	0.13828
R-HSA-9020933	Interleukin-23 signaling	0.101482	0.098175	0.0876486	0.0942026	0.086039	0.0956416	0.109794
R-HSA-9020956	Interleukin-27 signaling	0.132523	0.12055	0.120322	0.116322	0.110436	0.112052	0.138976
R-HSA-9027277	Erythropoietin activates Phospholipase C gamma (PLCG)	0.0745128	0.062162	0.06664	0.0683072	0.0751806	0.100911	0.132378
R-HSA-9027283	Erythropoietin activates STAT5	0.125138	0.111119	0.107705	0.100829	0.107134	0.108869	0.14311
R-HSA-9027284	Erythropoietin activates RAS	0.102002	0.0972836	0.0842915	0.0947517	0.0897148	0.102018	0.123857
R-HSA-8876725	Protein methylation	0.124726	0.117886	0.124961	0.123229	0.129588	0.118227	0.118185
R-HSA-173599	Formation of the active cofactor, UDP-glucuronate	0.260076	0.201281	0.188145	0.179885	0.226342	0.171408	0.193976
R-HSA-1296025	ATP sensitive Potassium channels	-0.425994	-0.46656	-0.488305	-0.409822	-0.453129	-0.47524	-0.495158
R-HSA-418990	Adherens junctions interactions	0.0524159	0.0527918	0.0582421	0.0578533	0.0464897	0.0560218	0.0481301
R-HSA-2485179	Activation of the phototransduction cascade	0.0907899	0.1009	0.0818955	0.0837456	0.0771715	0.0874151	0.0650585
R-HSA-425561	Sodium/Calcium exchangers	0.113279	0.0991038	0.126675	0.108205	0.163205	0.103877	0.136517
R-HSA-1482798	Acyl chain remodeling of CL	0.0455327	0.0547591	0.0642701	0.0494558	0.0575656	0.0777025	0.0597914
R-HSA-1296061	HCN channels	-0.329671	-0.312532	-0.359825	-0.313827	-0.311269	-0.339181	-0.403302
R-HSA-162699	Synthesis of dolichyl-phosphate mannose	0.187195	0.23296	0.275687	0.19039	0.224778	0.249917	0.253682
R-HSA-162658	Golgi Cisternae Pericentriolar Stack Reorganization	0.0789869	0.08307	0.105689	0.0848326	0.0866685	0.0769872	0.0730553
R-HSA-196819	Vitamin B1 (thiamin) metabolism	0.00350485	0.00881839	-0.00641942	-0.0428018	-0.0718787	-0.0549432	-0.0568683
R-HSA-171306	Packaging Of Telomere Ends	0.144529	0.14352	0.179648	0.136296	0.142843	0.140062	0.133689
R-HSA-2299718	Condensation of Prophase Chromosomes	0.1323	0.126872	0.203301	0.132249	0.130771	0.125881	0.118453
R-HSA-2559586	DNA Damage/Telomere Stress Induced Senescence	0.125355	0.122571	0.152477	0.123695	0.122212	0.127256	0.121083
R-HSA-427389	ERCC6 (CSB) and EHMT2 (G9a) positively regulate rRNA expression	0.146299	0.142748	0.165666	0.152581	0.14296	0.142784	0.134068
R-HSA-5334118	DNA methylation	0.153606	0.145385	0.202364	0.147619	0.147345	0.141987	0.127991
R-HSA-5693571	Nonhomologous End-Joining (NHEJ)	0.11898	0.115203	0.132746	0.117332	0.115906	0.112188	0.107693
R-HSA-73728	RNA Polymerase I Promoter Opening	0.13698	0.126154	0.181617	0.13166	0.135597	0.127629	0.118064
R-HSA-9616222	Transcriptional regulation of granulopoiesis	0.138019	0.131736	0.160955	0.134431	0.130291	0.134592	0.130978
R-HSA-9634600	Regulation of glycolysis by fructose 2,6-bisphosphate metabolism	0.153101	0.145124	0.14047	0.151315	0.160809	0.159261	0.15329
R-HSA-419812	Calcitonin-like ligand receptors	-0.00512509	-0.022813	-0.0202544	-0.020734	-0.0293052	0.0238043	0.0361949
R-HSA-193681	Ceramide signalling	0.0229714	0.0139692	-0.012634	0.0062908	0.0237688	0.0369065	0.0582691
R-HSA-5626978	TNFR1-mediated ceramide production	0.303703	0.305803	0.289709	0.306337	0.300786	0.309043	0.299505
R-HSA-1368082	RORA activates gene expression	0.148587	0.155438	0.149293	0.166478	0.147296	0.15752	0.156659
R-HSA-1236977	Endosomal/Vacuolar pathway	0.171458	0.187907	0.182764	0.173336	0.177275	0.185148	0.169992
R-HSA-1592389	Activation of Matrix Metalloproteinases	-0.0290431	-0.00967305	-0.0357644	-0.0463731	-0.0261222	-0.0172343	0.0315557
R-HSA-5223345	Miscellaneous transport and binding events	0.0752018	0.0613671	0.0594794	0.0566043	0.0645129	0.0551675	0.0693232
R-HSA-5685939	HDR through MMEJ (alt-NHEJ)	0.11874	0.112945	0.186266	0.120555	0.116673	0.120548	0.102342
R-HSA-5693548	Sensing of DNA Double Strand Breaks	0.100674	0.100044	0.111494	0.102044	0.0998781	0.102684	0.0945261
R-HSA-2022857	Keratan sulfate degradation	0.0668946	0.0742177	0.0366257	0.0480969	0.0681068	0.0578229	0.103094
R-HSA-5576892	Phase 0 - rapid depolarisation	0.0492537	0.0492691	0.0431826	0.0505339	0.0596989	0.0670328	0.0655995
R-HSA-1369007	Mitochondrial ABC transporters	-0.0213423	-0.0650281	-0.0264587	-0.0701804	-0.0755434	-0.0799714	0.0555468
R-HSA-2564830	Cytosolic iron-sulfur cluster assembly	0.0301957	0.0171971	0.0599014	0.00733468	0.0277204	0.0178821	0.0325799
R-HSA-3232118	SUMOylation of transcription factors	0.136879	0.132646	0.136442	0.140432	0.134	0.141894	0.141439
R-HSA-428542	Regulation of commissural axon pathfinding by SLIT and ROBO	0.0782856	0.0681468	0.069309	0.0795092	0.0755689	0.0981294	0.0915232
R-HSA-9013407	RHOH GTPase cycle	0.121624	0.111951	0.115456	0.116632	0.115079	0.114943	0.121154
R-HSA-428890	Role of ABL in ROBO-SLIT signaling	0.115271	0.109482	0.100463	0.11093	0.113537	0.108199	0.108962
R-HSA-388844	Receptor-type tyrosine-protein phosphatases	-0.115446	-0.131466	-0.0919817	-0.117642	-0.132032	-0.138152	-0.100569
R-HSA-5661270	Formation of xylulose-5-phosphate	0.0647	0.0703791	0.103413	0.0556484	0.0964115	0.0871904	0.13315
R-HSA-2142789	Ubiquinol biosynthesis	0.00709676	-0.0187645	0.022848	-0.0123774	0.0257906	-0.00678426	0.00857771
R-HSA-8978934	Metabolism of cofactors	0.163094	0.155966	0.161761	0.166538	0.164697	0.15709	0.150888
R-HSA-2142712	Synthesis of 12-eicosatetraenoic acid derivatives	0.119118	0.198156	0.143638	0.122897	0.157148	0.178003	0.201131
R-HSA-8850843	Phosphate bond hydrolysis by NTPDase proteins	0.155893	0.0883587	0.109131	0.0689307	0.13031	0.108577	0.0479178
R-HSA-2173795	Downregulation of SMAD2/3:SMAD4 transcriptional activity	0.169588	0.170739	0.165504	0.177564	0.167358	0.177887	0.174016
R-HSA-9623433	NR1H2 & NR1H3 regulate gene expression to control bile acid homeostasis	0.134247	0.128617	0.128701	0.139923	0.123338	0.130372	0.124686
R-HSA-8854214	TBC/RABGAPs	0.123082	0.127548	0.116949	0.126586	0.120526	0.131557	0.123886
R-HSA-8934903	Receptor Mediated Mitophagy	0.146572	0.14948	0.126352	0.156711	0.141595	0.150516	0.144346
R-HSA-352230	Amino acid transport across the plasma membrane	0.0599757	0.0510833	0.0581969	0.0395351	0.0591549	0.0540008	0.091539
R-HSA-176974	Unwinding of DNA	0.0676376	0.0490823	0.174486	0.0506054	0.0591646	0.0571932	0.0297624
R-HSA-69190	DNA strand elongation	0.0960172	0.0832615	0.18459	0.079467	0.0975182	0.0810381	0.0780223
R-HSA-69205	G1/S-Specific Transcription	0.134022	0.125637	0.190978	0.131462	0.133828	0.128795	0.123681
R-HSA-8949613	Cristae formation	0.11224	0.128814	0.131035	0.117694	0.115735	0.116313	0.117531
R-HSA-8949215	Mitochondrial calcium ion transport	0.159534	0.173381	0.186225	0.168024	0.171045	0.167866	0.168546
R-HSA-8949664	Processing of SMDT1	0.110544	0.131476	0.135429	0.134532	0.132072	0.136996	0.120098
R-HSA-3371511	HSF1 activation	0.123005	0.117818	0.13191	0.12534	0.123074	0.123386	0.122883
R-HSA-3371568	Attenuation phase	0.138113	0.132271	0.137386	0.141631	0.134914	0.138982	0.142607
R-HSA-3371571	HSF1-dependent transactivation	0.134938	0.128612	0.134774	0.138066	0.13322	0.136823	0.13782
R-HSA-8849468	PTK6 Regulates Proteins Involved in RNA Processing	0.155071	0.154298	0.152009	0.159184	0.15761	0.160882	0.154382
R-HSA-2995383	Initiation of Nuclear Envelope (NE) Reformation	0.134989	0.139532	0.17981	0.142269	0.1381	0.143183	0.136773
R-HSA-8866376	Reelin signalling pathway	0.112407	0.105114	0.101585	0.113396	0.112481	0.114582	0.110706
R-HSA-426486	Small interfering RNA (siRNA) biogenesis	0.193993	0.183953	0.192582	0.201237	0.190332	0.191273	0.194938
R-HSA-75892	Platelet Adhesion to exposed collagen	0.116913	0.100442	0.122523	0.124688	0.134925	0.138826	0.15498
R-HSA-198753	ERK/MAPK targets	0.162327	0.148935	0.161615	0.161742	0.161779	0.165811	0.152464
R-HSA-199920	CREB phosphorylation	0.179746	0.194121	0.154923	0.193425	0.165446	0.191913	0.179257
R-HSA-450282	MAPK targets/ Nuclear events mediated by MAP kinases	0.158629	0.152114	0.155295	0.160874	0.156501	0.161378	0.153421
R-HSA-5621575	CD209 (DC-SIGN) signaling	0.158256	0.154624	0.152006	0.15837	0.156922	0.161951	0.17116
R-HSA-1502540	Signaling by Activin	0.0840233	0.0949903	0.0505927	0.0978504	0.0708059	0.0974115	0.118818
R-HSA-8849175	Threonine catabolism	-0.116739	-0.124039	-0.115752	-0.117968	-0.14133	-0.102497	-0.0516738
R-HSA-5357786	TNFR1-induced proapoptotic signaling	0.0659248	0.0687125	0.0548539	0.0676918	0.0650467	0.0642486	0.0632031
R-HSA-203615	eNOS activation	0.162033	0.152559	0.152272	0.158727	0.155414	0.153732	0.149892
R-HSA-6804754	Regulation of TP53 Expression	0.158839	0.150536	0.168103	0.155615	0.150077	0.16395	0.159744
R-HSA-9615933	Postmitotic nuclear pore complex (NPC) reformation	0.124435	0.126095	0.140361	0.131706	0.123893	0.118192	0.112318
R-HSA-8963693	Aspartate and asparagine metabolism	-0.0511959	-0.0514573	-0.0445928	-0.0699074	-0.0359733	-0.0792368	-0.0774002
R-HSA-3295583	TRP channels	0.124298	0.112174	0.093575	0.12164	0.121241	0.103616	0.0627627
R-HSA-2022377	Metabolism of Angiotensinogen to Angiotensins	0.0334638	0.0512518	0.0295145	0.03137	0.0531177	0.0607091	0.113664
R-HSA-9648895	Response of EIF2AK1 (HRI) to heme deficiency	0.0961188	0.0992902	0.100559	0.0938477	0.0911135	0.0839214	0.0912316
R-HSA-191273	Cholesterol biosynthesis	0.0844482	0.0928104	0.078308	0.0765466	0.0904897	0.0873636	0.0877446
R-HSA-6807047	Cholesterol biosynthesis via desmosterol	0.083021	0.103717	0.0733203	0.0863224	0.0899915	0.0972949	0.0927998
R-HSA-6807062	Cholesterol biosynthesis via lathosterol	0.083021	0.103717	0.0733203	0.0863224	0.0899915	0.0972949	0.0927998
R-HSA-389542	NADPH regeneration	0.231081	0.203296	0.230437	0.270593	0.293365	0.228732	0.272994
R-HSA-193807	Synthesis of bile acids and bile salts via 27-hydroxycholesterol	0.0287402	0.0327399	0.0191413	0.0283181	0.0333658	0.0562853	0.0665968
R-HSA-196757	Metabolism of folate and pterines	0.00734604	-0.0145864	0.0537536	-0.0259849	-0.000382812	0.000109818	-0.00279021
R-HSA-1482883	Acyl chain remodeling of DAG and TAG	-0.0602618	-0.0215396	-0.07057	-0.00860123	-0.0596392	-0.00116245	0.028721
R-HSA-75109	Triglyceride biosynthesis	0.134753	0.128736	0.120989	0.130805	0.138902	0.122662	0.13397
R-HSA-2187335	The retinoid cycle in cones (daylight vision)	-0.171701	-0.141051	-0.113163	-0.159929	-0.152478	-0.114932	-0.107223
R-HSA-114508	Effects of PIP2 hydrolysis	0.0786179	0.0813689	0.0812952	0.0885338	0.0937428	0.0816668	0.0785632
R-HSA-389359	CD28 dependent Vav1 pathway	0.155266	0.143461	0.146297	0.153421	0.157744	0.146302	0.135219
R-HSA-5696395	Formation of Incision Complex in GG-NER	0.164408	0.161935	0.16746	0.164365	0.164863	0.155115	0.154638
R-HSA-5696399	Global Genome Nucleotide Excision Repair (GG-NER)	0.155815	0.154325	0.168807	0.153322	0.157857	0.147619	0.148303
R-HSA-71262	Carnitine synthesis	-0.0630077	-0.0674914	-0.0237889	-0.043445	-0.101898	-0.0827185	-0.11516
R-HSA-163210	Formation of ATP by chemiosmotic coupling	0.241964	0.237041	0.258105	0.228794	0.250611	0.240576	0.238247
R-HSA-1799339	SRP-dependent cotranslational protein targeting to membrane	0.31617	0.311059	0.317761	0.309552	0.313773	0.305723	0.312682
R-HSA-6804758	Regulation of TP53 Activity through Acetylation	0.143025	0.141721	0.148107	0.144941	0.134943	0.143371	0.139824
R-HSA-162710	Synthesis of glycosylphosphatidylinositol (GPI)	0.0267739	0.0194032	0.0240906	0.0182838	0.0507153	0.00782188	0.00537615
R-HSA-110314	Recognition of DNA damage by PCNA-containing replication complex	0.18897	0.182735	0.206414	0.178142	0.184448	0.175087	0.171019
R-HSA-446210	Synthesis of UDP-N-acetyl-glucosamine	0.0209269	0.0549036	0.0216089	0.0603747	0.00559097	0.0475431	0.0458068
R-HSA-8985586	SLIT2:ROBO1 increases RHOA activity	0.178385	0.138784	0.146961	0.151604	0.166803	0.163532	0.128274
R-HSA-8964539	Glutamate and glutamine metabolism	0.0335618	0.0443342	0.0437818	0.0421768	0.0491586	0.0550779	0.0704939
R-HSA-189445	Metabolism of porphyrins	0.044472	0.0437299	0.0533141	0.033778	0.0429096	0.037202	0.0429482
R-HSA-189483	Heme degradation	0.0624395	0.0592973	0.073147	0.0402885	0.0655127	0.0612311	0.0570558
R-HSA-879518	Transport of organic anions	-0.00925405	-0.0391225	-0.0379964	-0.0496237	-0.0609481	0.0140086	0.0455657
R-HSA-416993	Trafficking of GluR2-containing AMPA receptors	0.0676992	0.0789062	0.073443	0.0758567	0.0777581	0.0719829	0.0633888
R-HSA-177504	Retrograde neurotrophin signalling	0.128752	0.120522	0.116799	0.129444	0.136398	0.113822	0.125984
R-HSA-5140745	WNT5A-dependent internalization of FZD2, FZD5 and ROR2	0.12939	0.125916	0.129695	0.132006	0.133207	0.123742	0.142297
R-HSA-8866427	VLDLR internalisation and degradation	0.093639	0.0948228	0.0815083	0.100747	0.0937201	0.0941982	0.104797
R-HSA-73621	Pyrimidine catabolism	0.0192938	0.0648791	0.00896886	0.0582963	0.030692	0.0778881	0.0965852
R-HSA-2408552	Methylation of MeSeH for excretion	-0.165799	-0.202279	-0.183454	-0.185675	-0.17138	-0.183045	-0.231289
R-HSA-156711	Polo-like kinase mediated events	0.13703	0.122969	0.186623	0.135012	0.129771	0.121966	0.118136
R-HSA-2514853	Condensation of Prometaphase Chromosomes	0.118562	0.106825	0.229232	0.106156	0.12809	0.0993423	0.10556
R-HSA-2980767	Activation of NIMA Kinases NEK9, NEK6, NEK7	0.11283	0.105152	0.202719	0.111846	0.121405	0.104641	0.104659
R-HSA-69478	G2/M DNA replication checkpoint	0.112213	0.108261	0.252184	0.0984247	0.122774	0.0920239	0.114649
R-HSA-210745	Regulation of gene expression in beta cells	0.11766	0.117875	0.126806	0.117078	0.109743	0.11083	0.115935
R-HSA-419408	Lysosphingolipid and LPA receptors	-0.0399864	-0.0168357	-0.0431122	-0.000790492	-0.0436156	-0.0113836	-0.00145363
R-HSA-196108	Pregnenolone biosynthesis	0.0565955	0.0611994	0.0695548	0.0489798	0.0635388	0.0860352	0.0876347
R-HSA-418886	Netrin mediated repulsion signals	0.0629388	0.0465884	0.05177	0.0581123	0.0666765	0.0772401	0.0739116
R-HSA-1483248	Synthesis of PIPs at the ER membrane	0.0730176	0.0541824	0.090442	0.0601198	0.0789797	0.0562721	0.0343414
R-HSA-9012546	Interleukin-18 signaling	-0.0241978	-0.0503272	-0.0304123	-0.0369779	-0.0433096	0.0108932	0.100208
R-HSA-166187	Mitochondrial Uncoupling	-0.00463858	-0.0217105	-0.0250048	-0.0620391	-0.0526905	-0.0261496	-0.0700364
R-HSA-167826	The fatty acid cycling model	0.0726273	0.0799565	0.0574953	0.0160163	0.0292561	0.0542313	-0.000137826
R-HSA-167827	The proton buffering model	0.0726273	0.0799565	0.0574953	0.0160163	0.0292561	0.0542313	-0.000137826
R-HSA-1169092	Activation of RAS in B cells	0.132038	0.149461	0.140971	0.131858	0.113599	0.129253	0.120528
R-HSA-392517	Rap1 signalling	0.151007	0.148659	0.142544	0.151142	0.148991	0.151759	0.15543
R-HSA-71336	Pentose phosphate pathway	0.0943701	0.104635	0.121717	0.0859614	0.0918629	0.0990147	0.0856928
R-HSA-379726	Mitochondrial tRNA aminoacylation	0.0222895	0.0346618	0.0220713	0.0304051	0.0229078	0.0374842	0.015147
R-HSA-1566948	Elastic fibre formation	0.0170951	0.0120415	-6.81003e-05	0.0150901	0.0211976	0.0190433	0.0409429
R-HSA-2129379	Molecules associated with elastic fibres	0.0236045	0.0161101	0.00500525	0.0205274	0.0273781	0.0242088	0.045873
R-HSA-947581	Molybdenum cofactor biosynthesis	-0.0469755	-0.0196511	-0.084407	-0.110477	-0.068192	-0.142019	-0.119275
R-HSA-427589	Type II Na+/Pi cotransporters	-0.034883	-0.0523353	-0.126697	-0.0836073	-0.0576178	-0.0498126	-0.0985855
R-HSA-427652	Sodium-coupled phosphate cotransporters	0.104179	0.047163	0.00804225	0.0554604	0.0555823	0.0462485	0.0202404
R-HSA-5683826	Surfactant metabolism	0.00618219	-0.0106752	0.021176	-0.0024414	0.0211404	0.0188106	0.0518595
R-HSA-380994	ATF4 activates genes in response to endoplasmic reticulum stress	0.116984	0.120762	0.124129	0.117122	0.120335	0.107614	0.118487
R-HSA-381042	PERK regulates gene expression	0.136855	0.143298	0.140387	0.139792	0.136221	0.136139	0.143306
R-HSA-450604	KSRP (KHSRP) binds and destabilizes mRNA	0.152245	0.150896	0.149134	0.155358	0.146296	0.145173	0.148097
R-HSA-4419969	Depolymerisation of the Nuclear Lamina	0.117736	0.117861	0.153168	0.113313	0.119558	0.117509	0.122149
R-HSA-8963896	HDL assembly	0.139926	0.130933	0.123018	0.137722	0.149159	0.157781	0.161604
R-HSA-8963898	Plasma lipoprotein assembly	0.0897555	0.0967325	0.0774458	0.092508	0.0963919	0.0984543	0.111668
R-HSA-196807	Nicotinate metabolism	0.0568794	0.0729605	0.0516552	0.0719525	0.0646849	0.0697873	0.0900771
R-HSA-1614517	Sulfide oxidation to sulfate	0.0921082	0.0581966	0.113032	0.0307234	0.0695627	0.0487492	0.0337099
R-HSA-1614558	Degradation of cysteine and homocysteine	0.0687358	0.0690818	0.0859168	0.0573611	0.0740104	0.0656409	0.0504894
R-HSA-1614635	Sulfur amino acid metabolism	0.0888593	0.0927934	0.101027	0.0793746	0.0834458	0.0837639	0.077012
R-HSA-8864260	Transcriptional regulation by the AP-2 (TFAP2) family of transcription factors	0.173635	0.174881	0.18386	0.175266	0.172862	0.175202	0.169588
R-HSA-8866907	Activation of the TFAP2 (AP-2) family of transcription factors	0.180092	0.18453	0.174608	0.184336	0.168125	0.183988	0.170815
R-HSA-418890	Role of second messengers in netrin-1 signaling	0.0455326	0.0324144	0.047918	0.05336	0.0710091	0.0892837	0.0907228
R-HSA-2473224	Antagonism of Activin by Follistatin	-0.0484324	-0.0618931	-0.129269	-0.0801931	-0.138227	-0.0493874	0.0464576
R-HSA-2025928	Calcineurin activates NFAT	0.20193	0.187618	0.171426	0.198532	0.199099	0.191673	0.207456
R-HSA-1307965	betaKlotho-mediated ligand binding	-0.258703	-0.282001	-0.327136	-0.251942	-0.30603	-0.27122	-0.399406
R-HSA-9014843	Interleukin-33 signaling	0.149626	-0.0702821	0.0371053	-0.115449	-0.00221444	-0.0964725	0.0653684
R-HSA-918233	TRAF3-dependent IRF activation pathway	0.155435	0.152873	0.141439	0.159498	0.144873	0.150269	0.138282
R-HSA-933541	TRAF6 mediated IRF7 activation	0.112662	0.111824	0.0991333	0.114157	0.101457	0.111639	0.105397
R-HSA-399997	Acetylcholine regulates insulin secretion	0.0741702	0.0713575	0.0585046	0.0593479	0.0616933	0.0789817	0.0904131
R-HSA-480985	Synthesis of dolichyl-phosphate-glucose	0.111202	0.120802	0.112876	0.114272	0.126598	0.123222	0.124189
R-HSA-8941332	RUNX2 regulates genes involved in cell migration	0.207713	0.219426	0.200491	0.221452	0.190452	0.206359	0.188871
R-HSA-9008059	Interleukin-37 signaling	0.108791	0.10143	0.0917377	0.105268	0.102659	0.106843	0.114318
R-HSA-5696394	DNA Damage Recognition in GG-NER	0.162787	0.163501	0.17204	0.162617	0.164194	0.158471	0.154808
R-HSA-1538133	G0 and Early G1	0.164453	0.157649	0.204915	0.164147	0.160172	0.161407	0.155084
R-HSA-69200	Phosphorylation of proteins involved in G1/S transition by active Cyclin E:Cdk2 complexes	0.118135	0.114585	0.193777	0.130598	0.113663	0.127333	0.120331
R-HSA-196836	Vitamin C (ascorbate) metabolism	0.130666	0.136818	0.141964	0.136956	0.147999	0.118321	0.115193
R-HSA-71384	Ethanol oxidation	-0.178989	-0.131523	-0.177627	-0.15968	-0.152811	-0.124916	-0.0545402
R-HSA-5652084	Fructose metabolism	-0.011915	0.013485	0.00732197	0.00580659	0.000118096	0.00355631	0.018233
R-HSA-70350	Fructose catabolism	-0.0171806	0.00856922	-0.00632836	0.00115169	-0.0086602	-0.00321809	0.0103524
R-HSA-1474151	Tetrahydrobiopterin (BH4) synthesis, recycling, salvage and regulation	0.180419	0.175985	0.177484	0.183729	0.177843	0.175111	0.164313
R-HSA-8964208	Phenylalanine metabolism	0.0510312	0.0526798	0.0439293	0.0226862	0.0498452	0.0589136	0.0549978
R-HSA-140837	Intrinsic Pathway of Fibrin Clot Formation	0.0300573	0.0179496	0.0202729	0.0164629	0.0292762	0.0494233	0.0415589
R-HSA-140875	Common Pathway of Fibrin Clot Formation	0.0416088	0.0486188	0.0391234	0.0260892	0.0277835	0.0340549	0.033721
R-HSA-140877	Formation of Fibrin Clot (Clotting Cascade)	0.0197603	0.0227955	0.0173914	0.00917917	0.0127493	0.0292886	0.0244096
R-HSA-70635	Urea cycle	0.0646214	0.0514148	0.0623457	0.047849	0.0763795	0.0693127	0.0663628
R-HSA-74217	Purine salvage	0.21819	0.232483	0.210347	0.216094	0.178642	0.221226	0.214146
R-HSA-1251932	PLCG1 events in ERBB2 signaling	0.13278	0.131026	0.130705	0.132029	0.133731	0.147935	0.150515
R-HSA-2179392	EGFR Transactivation by Gastrin	0.136459	0.133657	0.130944	0.129289	0.131481	0.138087	0.138927
R-HSA-881907	Gastrin-CREB signalling pathway via PKC and MAPK	0.137838	0.135583	0.132714	0.13202	0.135204	0.14	0.136926
R-HSA-8857538	PTK6 promotes HIF1A stabilization	0.187415	0.184531	0.189934	0.186669	0.184876	0.189526	0.192777
R-HSA-8866910	TFAP2 (AP-2) family regulates transcription of growth factors and their receptors	0.198531	0.200905	0.204621	0.199336	0.196233	0.203682	0.201685
R-HSA-5653890	Lactose synthesis	0.17056	0.107503	0.227051	0.204744	0.315923	0.189154	0.08072
R-HSA-159740	Gamma-carboxylation of protein precursors	0.0140486	0.0391009	0.00874601	0.0126959	0.0435946	0.0326929	0.0367093
R-HSA-159763	Transport of gamma-carboxylated protein precursors from the endoplasmic reticulum to the Golgi apparatus	0.00883353	0.0306874	0.00394146	0.00721336	0.0427529	0.028721	0.0329571
R-HSA-159782	Removal of aminoterminal propeptides from gamma-carboxylated proteins	-0.00228725	0.0211516	-0.00896236	-0.00794666	0.0282805	0.0191569	0.0125794
R-HSA-159854	Gamma-carboxylation, transport, and amino-terminal cleavage of proteins	0.00288762	0.0290037	-0.00404767	-0.00239556	0.0297106	0.0231275	0.0168631
R-HSA-140834	Extrinsic Pathway of Fibrin Clot Formation	-0.189786	-0.168585	-0.225965	-0.177174	-0.19076	-0.214884	-0.193687
R-HSA-173736	Alternative complement activation	-0.166592	-0.100762	-0.200631	-0.124131	-0.191211	-0.128789	-0.0266901
R-HSA-75205	Dissolution of Fibrin Clot	-0.0226275	0.00418164	-0.0106001	-0.0251618	-0.0309766	-0.0154399	0.00405286
R-HSA-174577	Activation of C3 and C5	-0.0273279	0.00893096	-0.0400349	-0.00587877	-0.0368324	-0.0116154	-0.00580917
R-HSA-1237044	Erythrocytes take up carbon dioxide and release oxygen	-0.055174	-0.0673746	-0.0820612	-0.0473819	-0.0722122	-0.0607338	-0.025816
R-HSA-1247673	Erythrocytes take up oxygen and release carbon dioxide	-0.0482409	-0.0689014	-0.0768125	-0.0428653	-0.0710762	-0.0568406	-0.0226664
R-HSA-1480926	O2/CO2 exchange in erythrocytes	-0.055174	-0.0673746	-0.0820612	-0.0473819	-0.0722122	-0.0607338	-0.025816
R-HSA-166665	Terminal pathway of complement	0.0599877	0.0874677	0.059718	0.0813423	0.0714061	0.0718046	0.101043
R-HSA-450341	Activation of the AP-1 family of transcription factors	0.159687	0.153715	0.151671	0.161326	0.157192	0.159546	0.155071
R-HSA-1362277	Transcription of E2F targets under negative control by DREAM complex	0.17507	0.1689	0.208639	0.175645	0.170249	0.173543	0.162945
R-HSA-4411364	Binding of TCF/LEF:CTNNB1 to target gene promoters	0.131833	0.132224	0.138924	0.141556	0.123524	0.139841	0.127846
R-HSA-8866911	TFAP2 (AP-2) family regulates transcription of cell cycle factors	0.169063	0.164504	0.199882	0.168802	0.164941	0.170113	0.161693
R-HSA-8951430	RUNX3 regulates WNT signaling	0.146261	0.141398	0.159559	0.151135	0.133437	0.149957	0.136905
R-HSA-112412	SOS-mediated signalling	0.152878	0.157329	0.146471	0.145821	0.141269	0.139439	0.135414
R-HSA-2428933	SHC-related events triggered by IGF1R	0.147551	0.15034	0.139909	0.133626	0.129937	0.131131	0.122028
R-HSA-5674135	MAP2K and MAPK activation	0.136241	0.134558	0.127935	0.137329	0.130513	0.139237	0.135513
R-HSA-5675221	Negative regulation of MAPK pathway	0.162133	0.160906	0.15447	0.161422	0.155963	0.158352	0.154245
R-HSA-8849471	PTK6 Regulates RHO GTPases, RAS GTPase and MAP kinases	0.131227	0.129755	0.117026	0.137402	0.128904	0.141572	0.128536
R-HSA-8851805	MET activates RAS signaling	0.100023	0.103192	0.094392	0.0845639	0.092654	0.0869941	0.0744229
R-HSA-9026519	Activated NTRK2 signals through RAS	0.108388	0.119389	0.10826	0.102412	0.0925621	0.0960889	0.0832089
R-HSA-9034015	Signaling by NTRK3 (TRKC)	0.105276	0.096946	0.0974427	0.100478	0.100238	0.115784	0.113125
R-HSA-9034864	Activated NTRK3 signals through RAS	0.0954404	0.115214	0.0945826	0.0974808	0.0838127	0.0890382	0.0723034
R-HSA-8951936	RUNX3 regulates p14-ARF	0.143076	0.148153	0.138916	0.147064	0.137462	0.148899	0.143464
R-HSA-8964026	Chylomicron clearance	0.0355421	0.0618439	0.0200097	0.0533082	0.0413123	0.0486226	0.0377276
R-HSA-2173791	TGF-beta receptor signaling in EMT (epithelial to mesenchymal transition)	0.154892	0.15013	0.140025	0.149656	0.147579	0.147648	0.148508
R-HSA-8941855	RUNX3 regulates CDKN1A transcription	0.130191	0.12741	0.136135	0.131924	0.126482	0.141154	0.143274
R-HSA-167021	PLC-gamma1 signalling	0.0208785	0.00921273	0.01589	0.0335323	0.0500502	0.0809224	0.09457
R-HSA-167060	NGF processing	-0.0138587	-0.0164658	-0.0306208	-0.043955	-0.00947739	0.0026114	0.0123252
R-HSA-169893	Prolonged ERK activation events	0.132589	0.126911	0.113601	0.13658	0.126284	0.134387	0.131599
R-HSA-170968	Frs2-mediated activation	0.142876	0.13487	0.129015	0.143461	0.13952	0.140443	0.136945
R-HSA-170984	ARMS-mediated activation	0.130075	0.127805	0.10953	0.13913	0.119452	0.136751	0.131223
R-HSA-187015	Activation of TRKA receptors	0.00251755	-0.00814687	-0.0392681	0.00591448	-0.0186648	0.00912947	0.0555319
R-HSA-187042	TRKA activation by NGF	0.0570963	0.0600814	0.00545447	0.0499833	0.0611253	0.0621445	0.0847263
R-HSA-187706	Signalling to p38 via RIT and RIN	0.21936	0.222005	0.213073	0.222467	0.220514	0.224833	0.23948
R-HSA-193697	p75NTR regulates axonogenesis	0.121674	0.0989878	0.10306	0.0990084	0.115934	0.109018	0.120344
R-HSA-198745	Signalling to STAT3	0.11103	0.10311	0.107203	0.108636	0.108471	0.101681	0.123052
R-HSA-205017	NFG and proNGF binds to p75NTR	0.000383468	-0.0329969	-0.0510758	-0.0586601	0.00391297	-0.0489361	0.0436181
R-HSA-205025	NADE modulates death signalling	0.0897567	0.0838317	0.0739338	0.0748869	0.0761686	0.0721232	0.0797421
R-HSA-205043	NRIF signals cell death from the nucleus	0.176918	0.16517	0.162361	0.161872	0.168522	0.167991	0.170235
R-HSA-209563	Axonal growth stimulation	0.173372	0.142574	0.141991	0.144277	0.162287	0.15665	0.154502
R-HSA-9036866	Expression and Processing of Neurotrophins	-0.0138587	-0.0164658	-0.0306208	-0.043955	-0.00947739	0.0026114	0.0123252
R-HSA-2032785	YAP1- and WWTR1 (TAZ)-stimulated gene expression	0.0913153	0.0866074	0.0745608	0.0881822	0.0808707	0.0879021	0.0809307
R-HSA-5578768	Physiological factors	0.0918269	0.0849993	0.0748311	0.08491	0.0800931	0.0969262	0.0844086
R-HSA-388479	Vasopressin-like receptors	-0.0246144	-0.0529808	-0.0648078	-0.0474436	-0.0315814	-0.0275989	-0.0408459
R-HSA-193048	Androgen biosynthesis	0.0353811	-0.0287519	0.00492371	-0.04605	-0.0132402	-0.0100516	0.0344146
R-HSA-194002	Glucocorticoid biosynthesis	0.0601933	0.00733412	0.0409095	0.0119253	0.0385473	0.05736	0.0690483
R-HSA-209952	Peptide hormone biosynthesis	0.0455401	-0.0354716	-0.00364729	-0.0474172	-0.0120506	-0.0280274	0.0131179
R-HSA-193993	Mineralocorticoid biosynthesis	0.150182	0.0539506	0.0722816	-0.0118929	0.0504219	0.0359572	0.143714
R-HSA-209776	Metabolism of amine-derived hormones	-0.0237248	-0.0344136	-0.0546507	-0.044902	-0.0431632	-0.0587874	-0.0858305
R-HSA-209822	Glycoprotein hormones	0.0602878	-0.051595	-0.0424136	-0.114127	-0.0629089	-0.133451	0.0159276
R-HSA-209968	Thyroxine biosynthesis	-0.115099	-0.250744	-0.195569	-0.326083	-0.218226	-0.333148	-0.270425
R-HSA-74713	IRS activation	0.131404	0.128327	0.120291	0.125326	0.115262	0.118857	0.128937
R-HSA-74749	Signal attenuation	0.126704	0.112089	0.106673	0.113058	0.119767	0.110562	0.119162
R-HSA-8877330	RUNX1 and FOXP3 control the development of regulatory T lymphocytes (Tregs)	0.257756	0.214382	0.215788	0.192961	0.217235	0.187045	0.185034
R-HSA-448706	Interleukin-1 processing	0.165552	0.160522	0.141425	0.153045	0.145362	0.154199	0.194332
R-HSA-5660668	CLEC7A/inflammasome pathway	0.186835	0.182937	0.174596	0.189985	0.18352	0.186905	0.199205
R-HSA-1234158	Regulation of gene expression by Hypoxia-inducible Factor	0.164976	0.153829	0.154927	0.157814	0.155284	0.172875	0.172372
R-HSA-9020558	Interleukin-2 signaling	0.190748	0.170747	0.169896	0.176177	0.179495	0.183772	0.182101
R-HSA-1462054	Alpha-defensins	0.247804	0.241319	0.24657	0.239522	0.246431	0.24028	0.23384
R-HSA-449836	Other interleukin signaling	0.0937885	0.10052	0.0843182	0.0901907	0.100208	0.0870315	0.090619
R-HSA-8981607	Intracellular oxygen transport	-0.426469	-0.296385	-0.387025	-0.480157	-0.32643	-0.156232	-0.414546
R-HSA-3000480	Scavenging by Class A Receptors	0.0740498	0.0708082	0.0761322	0.0723482	0.0789231	0.0765853	0.0850097
R-HSA-430116	GP1b-IX-V activation signalling	0.127385	0.118814	0.121764	0.124459	0.124128	0.129497	0.144938
R-HSA-446107	Type I hemidesmosome assembly	0.0862947	0.0775778	0.0638365	0.087209	0.0904403	0.0885806	0.0660904
R-HSA-352238	Breakdown of the nuclear lamina	0.0647068	0.0651116	0.0724704	0.0668462	0.0676454	0.0695789	0.0629209
R-HSA-1369062	ABC transporters in lipid homeostasis	0.0229826	0.0197822	-0.00825523	0.00780382	0.027614	0.00708171	0.0126267
R-HSA-8963888	Chylomicron assembly	0.052786	0.0689666	0.039643	0.0534247	0.0488269	0.0530069	0.0715343
R-HSA-8963901	Chylomicron remodeling	0.0299985	0.0521551	0.0163292	0.036796	0.0304532	0.0391263	0.0461913
R-HSA-8964058	HDL remodeling	0.0249007	0.0431772	0.0031995	0.0292613	0.0258651	0.0257509	0.0351824
R-HSA-8866423	VLDL assembly	0.094449	0.107813	0.0886755	0.097444	0.104083	0.0863489	0.1104
R-HSA-8964046	VLDL clearance	0.0848331	0.11223	0.0860807	0.105266	0.113383	0.0985178	0.115201
R-HSA-354194	GRB2:SOS provides linkage to MAPK signaling for Integrins	0.0952449	0.0838509	0.076783	0.0955699	0.0913738	0.101699	0.0997444
R-HSA-372708	p130Cas linkage to MAPK signaling for integrins	0.0863901	0.08169	0.0650229	0.100982	0.0826552	0.109765	0.104182
R-HSA-9619665	EGR2 and SOX10-mediated initiation of Schwann cell myelination	0.0915759	0.102368	0.097625	0.109278	0.103131	0.105779	0.104307
R-HSA-181431	Acetylcholine binding and downstream events	0.0313822	0.0263458	0.0094711	0.00958462	-0.00446347	0.00983424	0.00951876
R-HSA-622323	Presynaptic nicotinic acetylcholine receptors	-0.0499037	-0.0468741	-0.0879431	-0.0736546	-0.112055	-0.0831765	-0.0745249
R-HSA-622327	Postsynaptic nicotinic acetylcholine receptors	0.0313822	0.0263458	0.0094711	0.00958462	-0.00446347	0.00983424	0.00951876
R-HSA-629594	Highly calcium permeable postsynaptic nicotinic acetylcholine receptors	0.0589674	0.0414473	0.0380325	0.0281859	0.0210082	0.0239206	0.019713
R-HSA-629597	Highly calcium permeable nicotinic acetylcholine receptors	-0.0188111	-0.0351699	-0.0561908	-0.0576825	-0.0876318	-0.0766763	-0.0720239
R-HSA-425381	Bicarbonate transporters	0.0405742	-0.0137536	0.0249862	-0.00236819	0.0216641	-0.00431497	0.00449646
R-HSA-1566977	Fibronectin matrix formation	0.0474798	0.0186216	0.0328822	0.0414673	0.0737992	0.0555739	0.0745871
R-HSA-189451	Heme biosynthesis	0.0344205	0.0316017	0.0392668	0.0296221	0.0281638	0.017089	0.0313418
R-HSA-6799990	Metal sequestration by antimicrobial proteins	0.112757	0.121772	0.112113	0.0818708	0.125158	0.13441	0.105101
R-HSA-5660526	Response to metal ions	0.0684354	0.0897193	0.0709635	0.0547556	0.0792747	0.0553191	0.100729
R-HSA-5661231	Metallothioneins bind metals	0.0643874	0.0878064	0.0692058	0.0537324	0.0789832	0.0550711	0.112077
R-HSA-5621480	Dectin-2 family	0.128513	0.126124	0.133014	0.1333	0.135597	0.147848	0.143887
R-HSA-9708296	tRNA-derived small RNA (tsRNA or tRNA-related fragment, tRF) biogenesis	0.153869	0.165005	0.168109	0.154724	0.146129	0.14681	0.157007
R-HSA-5674499	Negative feedback regulation of MAPK pathway	0.20128	0.199018	0.199165	0.199084	0.208505	0.198603	0.198193
R-HSA-444473	Formyl peptide receptors bind formyl peptides and many other ligands	0.144684	0.146009	0.148691	0.150554	0.148582	0.151839	0.153671
R-HSA-444821	Relaxin receptors	-0.018571	-0.0288089	-0.0399089	-0.021904	-0.0179643	-0.013014	-0.0557272
R-HSA-3000484	Scavenging by Class F Receptors	0.129813	0.12186	0.135359	0.123593	0.131344	0.124779	0.11806
R-HSA-3000497	Scavenging by Class H Receptors	0.159737	0.167026	0.153836	0.157394	0.172785	0.165489	0.23656
R-HSA-432142	Platelet sensitization by LDL	0.087909	0.0742233	0.0852406	0.0858974	0.0877514	0.0943641	0.0908769
R-HSA-8964041	LDL remodeling	0.133923	0.16601	0.113998	0.129048	0.127686	0.123739	0.112355
R-HSA-192456	Digestion of dietary lipid	-0.124895	-0.119164	-0.100043	-0.130892	-0.147903	-0.12916	-0.142718
R-HSA-8939246	RUNX1 regulates transcription of genes involved in differentiation of myeloid cells	0.149033	0.121517	0.126636	0.140954	0.134855	0.158472	0.15284
R-HSA-8849473	PTK6 Expression	0.192931	0.177701	0.18114	0.184734	0.193202	0.197494	0.20115
R-HSA-879415	Advanced glycosylation endproduct receptor signaling	0.159064	0.156985	0.158057	0.16105	0.162448	0.161829	0.164913
R-HSA-9652282	Drug-mediated inhibition of ERBB2 signaling	0.163042	0.153702	0.158136	0.158868	0.154556	0.161247	0.169632
R-HSA-187024	NGF-independant TRKA activation	-0.00873799	-0.0221917	-0.0570073	-0.00821289	-0.0317037	-0.00282732	0.0494836
R-HSA-111448	Activation of NOXA and translocation to mitochondria	0.148095	0.139252	0.166578	0.144637	0.140335	0.152437	0.14345
R-HSA-2559584	Formation of Senescence-Associated Heterochromatin Foci (SAHF)	0.139811	0.134228	0.17127	0.13962	0.133157	0.147343	0.140569
R-HSA-6811555	PI5P Regulates TP53 Acetylation	0.115501	0.111396	0.117527	0.113154	0.108276	0.118685	0.118073
R-HSA-69560	Transcriptional activation of p53 responsive genes	0.136118	0.128175	0.156585	0.131285	0.130726	0.139353	0.140758
R-HSA-69895	Transcriptional activation of cell cycle inhibitor p21	0.136118	0.128175	0.156585	0.131285	0.130726	0.139353	0.140758
R-HSA-2142670	Synthesis of epoxy (EET) and dihydroxyeicosatrienoic acids (DHET)	0.00918275	-0.0134351	-0.0693021	-0.102893	-0.102984	-0.097728	-0.0863587
R-HSA-2142816	Synthesis of (16-20)-hydroxyeicosatetraenoic acids (HETE)	-0.0267698	-0.0125435	0.0093352	-0.00926041	-0.0173374	0.0183631	-0.0174751
R-HSA-9018677	Biosynthesis of DHA-derived SPMs	0.0550313	0.0554431	0.0554437	0.033141	0.023808	0.0665542	0.131569
R-HSA-9018678	Biosynthesis of specialized proresolving mediators (SPMs)	0.0597533	0.0604628	0.0583843	0.0310747	0.0291798	0.0673415	0.132374
R-HSA-9018681	Biosynthesis of protectins	0.140327	0.182693	0.142197	0.129394	0.125386	0.176268	0.11204
R-HSA-1236973	Cross-presentation of particulate exogenous antigens (phagosomes)	0.0862044	0.0819033	0.0713137	0.0853754	0.0938354	0.106259	0.151012
R-HSA-5668599	RHO GTPases Activate NADPH Oxidases	0.116571	0.108318	0.10671	0.107631	0.114262	0.112829	0.117668
R-HSA-804914	Transport of fatty acids	-9.95041e-05	0.0175376	0.021052	-0.00186487	0.00987276	0.0258455	0.0244324
R-HSA-380612	Metabolism of serotonin	-0.34018	-0.328214	-0.313719	-0.370015	-0.272508	-0.296033	0.0990874
R-HSA-380615	Serotonin clearance from the synaptic cleft	-0.12338	-0.0934013	-0.152679	-0.0782829	-0.0801555	-0.108121	0.0988887
R-HSA-210990	PECAM1 interactions	0.0964057	0.0813569	0.0888843	0.0926857	0.0971477	0.102334	0.112932
R-HSA-8941413	Events associated with phagocytolytic activity of PMN cells	0.0931273	0.173587	0.132007	0.104572	0.150974	0.111998	0.104744
R-HSA-71032	Propionyl-CoA catabolism	0.0740461	0.0566637	0.0514255	0.0583745	0.051472	0.0799606	0.0700756
R-HSA-156581	Methylation	0.0528629	0.0548453	0.0590683	0.0417925	0.0543029	0.0489825	0.0528728
R-HSA-211957	Aromatic amines can be N-hydroxylated or N-dealkylated by CYP1A2	0.105482	0.185244	0.137369	0.131521	0.13746	0.180128	0.163682
R-HSA-9018682	Biosynthesis of maresins	-0.00944658	-0.00368052	-0.00634313	-0.0134979	-0.046554	0.00698988	0.0548797
R-HSA-9027307	Biosynthesis of maresin-like SPMs	-0.181571	-0.157198	-0.0880243	-0.158522	-0.161649	-0.16346	-0.160384
R-HSA-211999	CYP2E1 reactions	-0.360451	-0.312259	-0.406633	-0.348796	-0.421825	-0.341745	-0.330862
R-HSA-72731	Recycling of eIF2:GDP	0.214302	0.237566	0.207206	0.223155	0.195718	0.227866	0.225901
R-HSA-9633012	Response of EIF2AK4 (GCN2) to amino acid deficiency	0.231077	0.231193	0.233662	0.230376	0.227017	0.222778	0.228087
R-HSA-156842	Eukaryotic Translation Elongation	0.299452	0.298712	0.301533	0.296608	0.297409	0.294719	0.300716
R-HSA-156902	Peptide chain elongation	0.308408	0.305994	0.308721	0.305535	0.307227	0.301865	0.307836
R-HSA-2408557	Selenocysteine synthesis	0.316018	0.316507	0.312508	0.315809	0.313549	0.30893	0.316237
R-HSA-72764	Eukaryotic Translation Termination	0.317909	0.317903	0.316481	0.316765	0.316715	0.310684	0.317362
R-HSA-975956	Nonsense Mediated Decay (NMD) independent of the Exon Junction Complex (EJC)	0.315043	0.316421	0.313594	0.318936	0.313674	0.311099	0.31164
R-HSA-8866904	Negative regulation of activity of TFAP2 (AP-2) family transcription factors	0.122869	0.128168	0.115768	0.131297	0.126667	0.120197	0.113072
R-HSA-8866906	TFAP2 (AP-2) family regulates transcription of other transcription factors	0.143319	0.151066	0.120217	0.146546	0.121813	0.153998	0.17268
R-HSA-8869496	TFAP2A acts as a transcriptional repressor during retinoic acid induced cell differentiation	0.0766292	0.0762492	0.122604	0.077836	0.0835413	0.0783998	0.0660449
R-HSA-446343	Localization of the PINCH-ILK-PARVIN complex to focal adhesions	0.160446	0.152725	0.175339	0.152233	0.176097	0.154682	0.164002
R-HSA-446353	Cell-extracellular matrix interactions	0.111792	0.105418	0.122394	0.105673	0.117432	0.112232	0.116915
R-HSA-8875513	MET interacts with TNS proteins	0.0511349	0.0150702	0.0259627	0.0265712	0.0658982	0.0402391	0.0463546
R-HSA-844623	The IPAF inflammasome	0.0820768	0.096966	0.0261298	0.0292322	0.0495033	-0.00871543	0.0436574
R-HSA-389513	CTLA4 inhibitory signaling	0.141792	0.135318	0.137046	0.140783	0.13504	0.139325	0.132797
R-HSA-9706374	FLT3 signaling through SRC family kinases	0.194926	0.179825	0.183816	0.195867	0.194463	0.197248	0.188705
R-HSA-9032500	Activated NTRK2 signals through FYN	0.121109	0.11449	0.107049	0.117818	0.114785	0.12477	0.117767
R-HSA-9032759	NTRK2 activates RAC1	0.147613	0.143849	0.136638	0.143485	0.142626	0.137479	0.132916
R-HSA-1483191	Synthesis of PC	0.119725	0.118676	0.115287	0.133916	0.131413	0.128688	0.15678
R-HSA-113501	Inhibition of replication initiation of damaged DNA by RB1/E2F1	0.134426	0.125998	0.167934	0.135544	0.131862	0.133485	0.123189
R-HSA-1362300	Transcription of E2F targets under negative control by p107 (RBL1) and p130 (RBL2) in complex with HDAC1	0.153637	0.147713	0.19358	0.157288	0.149995	0.152942	0.150352
R-HSA-170145	Phosphorylation of proteins involved in the G2/M transition by Cyclin A:Cdc2 complexes	0.0779582	0.0760309	0.221619	0.0702512	0.0877424	0.0630333	0.0952893
R-HSA-176417	Phosphorylation of Emi1	0.0738698	0.0667114	0.201048	0.0715781	0.0868877	0.0600353	0.0645468
R-HSA-71288	Creatine metabolism	-0.0104789	-0.014844	0.0225655	-0.026755	-0.00532733	-0.0486434	-0.0564686
R-HSA-2197563	NOTCH2 intracellular domain regulates transcription	0.17801	0.183864	0.16319	0.188129	0.173537	0.183053	0.174667
R-HSA-110362	POLB-Dependent Long Patch Base Excision Repair	0.116089	0.112806	0.17449	0.119911	0.122257	0.114954	0.0870585
R-HSA-110373	Resolution of AP sites via the multiple-nucleotide patch replacement pathway	0.12465	0.120102	0.18298	0.116798	0.130302	0.115459	0.110535
R-HSA-110381	Resolution of AP sites via the single-nucleotide replacement pathway	0.234513	0.228798	0.238171	0.240168	0.231765	0.242948	0.214162
R-HSA-5651801	PCNA-Dependent Long Patch Base Excision Repair	0.136851	0.130373	0.194961	0.122404	0.140464	0.123856	0.125565
R-HSA-73930	Abasic sugar-phosphate removal via the single-nucleotide replacement pathway	0.242218	0.234048	0.236452	0.25016	0.238717	0.248145	0.21568
R-HSA-209905	Catecholamine biosynthesis	0.0599286	0.081992	0.0667016	0.101766	0.0771008	0.0857586	0.0919023
R-HSA-2142688	Synthesis of 5-eicosatetraenoic acids	0.0131019	0.0472662	0.0348163	0.024258	0.0356054	0.0747311	0.14346
R-HSA-2161541	Abacavir metabolism	0.145497	0.148559	0.163972	0.177694	0.142164	0.195414	0.0759241
R-HSA-629587	Highly sodium permeable postsynaptic acetylcholine nicotinic receptors	0.0338978	0.0830572	-0.0208592	0.0348375	-0.0616485	0.0316562	0.0090327
R-HSA-390696	Adrenoceptors	0.117702	0.126744	0.139176	0.156085	0.141483	0.148576	0.159133
R-HSA-70370	Galactose catabolism	0.136361	0.146221	0.166778	0.116348	0.140431	0.128414	0.116349
R-HSA-5696400	Dual Incision in GG-NER	0.173568	0.169302	0.195153	0.167671	0.175155	0.161916	0.158575
R-HSA-190704	Oligomerization of connexins into connexons	0.0289158	0.0174315	0.03056	0.0115404	0.030554	0.0264856	0.0357598
R-HSA-190827	Transport of connexins along the secretory pathway	0.0289158	0.0174315	0.03056	0.0115404	0.030554	0.0264856	0.0357598
R-HSA-193634	Axonal growth inhibition (RHOA activation)	0.126941	0.10379	0.107861	0.104184	0.121534	0.113936	0.114197
R-HSA-193692	Regulated proteolysis of p75NTR	0.171761	0.163837	0.155959	0.160426	0.162604	0.170925	0.188052
R-HSA-5635851	GLI proteins bind promoters of Hh responsive genes to promote transcription	-0.0383431	-0.061519	-0.0753023	-0.0357021	-0.0580705	-0.0248318	-0.0126526
R-HSA-166020	Transfer of LPS from LBP carrier to CD14	-0.178781	-0.117744	-0.133803	-0.173283	-0.206695	-0.17049	-0.110015
R-HSA-8851907	MET activates PI3K/AKT signaling	0.0814188	0.059853	0.0528245	0.0658519	0.0677267	0.0777752	0.10259
R-HSA-8865999	MET activates PTPN11	0.00568836	-0.0330849	-0.0188735	-0.0219635	0.0106729	-0.0151229	-0.00168313
R-HSA-8875555	MET activates RAP1 and RAC1	0.119402	0.11487	0.0935472	0.121502	0.112151	0.121923	0.117734
R-HSA-8875656	MET receptor recycling	0.0949045	0.086543	0.061515	0.0995258	0.0826912	0.0985909	0.0971484
R-HSA-8875791	MET activates STAT3	0.10831	0.092135	0.102245	0.0945899	0.0987774	0.0893282	0.108587
R-HSA-9022699	MECP2 regulates neuronal receptors and channels	0.136944	0.136802	0.134032	0.142615	0.132858	0.142077	0.129884
R-HSA-8939247	RUNX1 regulates transcription of genes involved in interleukin signaling	0.173866	0.158286	0.140514	0.146063	0.147654	0.149597	0.167591
R-HSA-1663150	The activation of arylsulfatases	0.0210493	-0.0156117	-0.0153413	-0.00331806	-0.0062871	0.0239093	0.104107
R-HSA-390666	Serotonin receptors	0.266205	0.253427	0.240414	0.261957	0.210431	0.189726	0.229439
R-HSA-392023	Adrenaline signalling through Alpha-2 adrenergic receptor	-0.0525402	-0.0846634	-0.074541	-0.0560648	-0.0780907	-0.0677071	-0.104363
R-HSA-190873	Gap junction degradation	0.117322	0.116179	0.11281	0.12224	0.124211	0.10908	0.112167
R-HSA-196025	Formation of annular gap junctions	0.117398	0.116587	0.114529	0.123146	0.125393	0.11134	0.114846
R-HSA-6783984	Glycine degradation	0.0973216	0.122653	0.136643	0.11475	0.110269	0.0993395	0.125512
R-HSA-174411	Polymerase switching on the C-strand of the telomere	0.134588	0.136008	0.160709	0.122986	0.135556	0.129394	0.13615
R-HSA-174417	Telomere C-strand (Lagging Strand) Synthesis	0.129833	0.129321	0.168378	0.118647	0.132448	0.123138	0.128362
R-HSA-174430	Telomere C-strand synthesis initiation	0.140205	0.142817	0.145851	0.131905	0.13806	0.137318	0.141275
R-HSA-68952	DNA replication initiation	0.0978572	0.0679983	0.173677	0.0743784	0.0915024	0.0478046	0.115754
R-HSA-69091	Polymerase switching	0.133085	0.127527	0.196514	0.113547	0.14016	0.115772	0.138199
R-HSA-69109	Leading Strand Synthesis	0.133085	0.127527	0.196514	0.113547	0.14016	0.115772	0.138199
R-HSA-69166	Removal of the Flap Intermediate	0.103626	0.0828758	0.205005	0.0751953	0.108687	0.0696705	0.0916411
R-HSA-69183	Processive synthesis on the lagging strand	0.101489	0.0809414	0.206641	0.0726798	0.105863	0.0668152	0.089407
R-HSA-69186	Lagging Strand Synthesis	0.110875	0.102587	0.186771	0.0921054	0.118156	0.093328	0.108578
R-HSA-2142691	Synthesis of Leukotrienes (LT) and Eoxins (EX)	0.0332023	0.0337347	0.0277047	0.0220459	0.0205726	0.0539635	0.0870728
R-HSA-2142700	Synthesis of Lipoxins (LX)	0.071595	0.0766827	0.0750007	0.0521631	0.0359284	0.0972692	0.172688
R-HSA-9018676	Biosynthesis of D-series resolvins	0.0861386	0.0918001	0.0832879	0.0734707	0.0450815	0.117241	0.162024
R-HSA-9018679	Biosynthesis of EPA-derived SPMs	0.0840703	0.0800073	0.0791873	0.0615858	0.0444149	0.107519	0.176922
R-HSA-9018683	Biosynthesis of DPA-derived SPMs	0.0604151	0.0610572	0.059413	0.0544786	0.0304953	0.095576	0.167916
R-HSA-9018896	Biosynthesis of E-series 18(S)-resolvins	0.0926832	0.0992917	0.08912	0.0791852	0.0528539	0.120197	0.16042
R-HSA-9020265	Biosynthesis of aspirin-triggered D-series resolvins	0.0607772	0.0771382	0.0643942	0.0673775	0.0386231	0.109156	0.137119
R-HSA-9023661	Biosynthesis of E-series 18(R)-resolvins	0.0702988	0.0865742	0.0726388	0.0740989	0.0475966	0.113101	0.138098
R-HSA-9025094	Biosynthesis of DPAn-3 SPMs	0.0604151	0.0610572	0.059413	0.0544786	0.0304953	0.095576	0.167916
R-HSA-9026286	Biosynthesis of DPAn-3-derived protectins and resolvins	0.0339672	0.0481627	0.0360293	0.0408371	0.00890697	0.0775899	0.121249
R-HSA-9026290	Biosynthesis of DPAn-3-derived maresins	0.0567197	0.0699595	0.0588526	0.0662633	0.0274419	0.103716	0.148301
R-HSA-9026403	Biosynthesis of DPAn-3-derived 13-series resolvins	0.0181192	0.032149	0.0212202	0.0282989	-0.0072507	0.0683928	0.117746
R-HSA-9027604	Biosynthesis of electrophilic 蠅-3 PUFA oxo-derivatives	0.0163576	0.0146292	0.0167578	0.0109621	-0.0105706	0.0582794	0.145786
R-HSA-156587	Amino Acid conjugation	0.028959	-0.0757519	-0.00547993	-0.0412169	0.0305658	0.0113764	0.0215385
R-HSA-159424	Conjugation of carboxylic acids	0.028959	-0.0757519	-0.00547993	-0.0412169	0.0305658	0.0113764	0.0215385
R-HSA-177128	Conjugation of salicylate with glycine	0.028959	-0.0757519	-0.00547993	-0.0412169	0.0305658	0.0113764	0.0215385
R-HSA-1483115	Hydrolysis of LPC	-0.0703561	-0.0793803	-0.141232	-0.0786615	-0.0881394	-0.106268	-0.0835272
R-HSA-110320	Translesion Synthesis by POLH	0.160458	0.158515	0.176267	0.152047	0.159106	0.150901	0.150712
R-HSA-1253288	Downregulation of ERBB4 signaling	0.176492	0.170109	0.159091	0.173972	0.167108	0.176901	0.171253
R-HSA-3134975	Regulation of innate immune responses to cytosolic DNA	0.183998	0.183288	0.170591	0.185902	0.18133	0.177724	0.174564
R-HSA-5696397	Gap-filling DNA repair synthesis and ligation in GG-NER	0.170775	0.165206	0.196832	0.158776	0.170358	0.158451	0.158949
R-HSA-8849469	PTK6 Regulates RTKs and Their Effectors AKT1 and DOK1	0.199573	0.199848	0.191148	0.201723	0.192708	0.19521	0.190765
R-HSA-8948747	Regulation of PTEN localization	0.158463	0.163964	0.156884	0.165488	0.160971	0.16752	0.15314
R-HSA-9664873	Pexophagy	0.186244	0.177253	0.17128	0.181975	0.179269	0.180476	0.18269
R-HSA-975110	TRAF6 mediated IRF7 activation in TLR7/8 or 9 signaling	0.177508	0.169008	0.159661	0.161741	0.164345	0.16599	0.166809
R-HSA-417973	Adenosine P1 receptors	-0.0748659	-0.0864324	-0.0807481	-0.00457406	-0.0351805	-0.00525785	-0.0522623
R-HSA-1614603	Cysteine formation from homocysteine	0.104991	0.127419	0.087854	0.134549	0.0787011	0.140779	0.108161
R-HSA-111932	CaMK IV-mediated phosphorylation of CREB	0.130674	0.131613	0.145765	0.137456	0.142744	0.132964	0.115637
R-HSA-111957	Cam-PDE 1 activation	0.0227488	-0.0102596	0.0287173	0.0199987	0.0678951	0.0108604	0.0209862
R-HSA-180024	DARPP-32 events	0.145886	0.14734	0.151703	0.150326	0.145375	0.153654	0.139763
R-HSA-442720	CREB1 phosphorylation through the activation of Adenylate Cyclase	0.148042	0.150286	0.131973	0.14485	0.151447	0.148102	0.158873
R-HSA-442729	CREB1 phosphorylation through the activation of CaMKII/CaMKK/CaMKIV cascasde	0.128118	0.134525	0.14926	0.140721	0.137022	0.12447	0.111824
R-HSA-451306	Ionotropic activity of kainate receptors	0.0898663	0.0769788	0.0866831	0.091435	0.0933481	0.103644	0.0914844
R-HSA-451308	Activation of Ca-permeable Kainate Receptor	0.0898663	0.0769788	0.0866831	0.091435	0.0933481	0.103644	0.0914844
R-HSA-9619229	Activation of RAC1 downstream of NMDARs	0.164222	0.165732	0.160462	0.164319	0.170305	0.160375	0.144848
R-HSA-8941284	RUNX2 regulates chondrocyte maturation	0.175632	0.173528	0.173337	0.163581	0.17857	0.15789	0.149188
R-HSA-1362409	Mitochondrial iron-sulfur cluster biogenesis	0.189794	0.190574	0.201732	0.173006	0.166053	0.17267	0.169832
R-HSA-2395516	Electron transport from NADPH to Ferredoxin	-0.00120799	-0.0618929	0.0204349	-0.117407	-0.0159909	-0.169718	-0.0744218
R-HSA-75108	Activation, myristolyation of BID and translocation to mitochondria	0.230788	0.210793	0.227819	0.218773	0.22256	0.216311	0.203115
R-HSA-1300645	Acrosome Reaction and Sperm:Oocyte Membrane Binding	0.0951078	0.0806929	0.0703468	0.0772325	0.0988393	0.0847093	0.101234
R-HSA-111447	Activation of BAD and translocation to mitochondria	0.13766	0.136699	0.136183	0.137413	0.131028	0.13624	0.135191
R-HSA-844455	The NLRP1 inflammasome	0.220402	0.212688	0.197339	0.203495	0.220049	0.198349	0.204786
R-HSA-8949275	RUNX3 Regulates Immune Response and Cell Migration	0.169732	0.157933	0.149931	0.164955	0.169259	0.173626	0.154301
R-HSA-5676934	Protein repair	0.121925	0.126286	0.114851	0.115216	0.110978	0.11811	0.13144
R-HSA-211935	Fatty acids	-0.119553	-0.118616	-0.0814462	-0.11541	-0.0768186	-0.0954215	-0.118452
R-HSA-211958	Miscellaneous substrates	-0.168934	-0.149326	-0.151777	-0.147842	-0.14415	-0.146503	-0.151596
R-HSA-381183	ATF6 (ATF6-alpha) activates chaperone genes	0.128564	0.126791	0.13898	0.127227	0.131156	0.130046	0.134386
R-HSA-8963676	Intestinal absorption	0.142963	0.114268	0.138192	0.135788	0.12068	0.10389	0.11436
R-HSA-8981373	Intestinal hexose absorption	0.142963	0.114268	0.138192	0.135788	0.12068	0.10389	0.11436
R-HSA-500753	Pyrimidine biosynthesis	0.0680933	0.0536934	0.0754633	0.0495437	0.0703018	0.0463932	0.052254
R-HSA-156582	Acetylation	0.0941072	0.0834016	0.158451	0.094098	0.0869607	0.0898434	0.0624593
R-HSA-77286	mitochondrial fatty acid beta-oxidation of saturated fatty acids	0.138902	0.126778	0.162675	0.114816	0.144399	0.149115	0.163023
R-HSA-77288	mitochondrial fatty acid beta-oxidation of unsaturated fatty acids	0.175035	0.176348	0.208544	0.145729	0.162937	0.180196	0.193226
R-HSA-77346	Beta oxidation of decanoyl-CoA to octanoyl-CoA-CoA	0.196925	0.190008	0.223704	0.172982	0.202455	0.20677	0.209994
R-HSA-77348	Beta oxidation of octanoyl-CoA to hexanoyl-CoA	0.224202	0.219018	0.249393	0.201424	0.232174	0.23666	0.242369
R-HSA-190374	FGFR1c and Klotho ligand binding and activation	0.109319	0.0928735	0.0798081	0.0953403	-0.0204203	-0.199863	-0.0820923
R-HSA-8849470	PTK6 Regulates Cell Cycle	0.106476	0.0919382	0.16979	0.10327	0.113298	0.10872	0.10774
R-HSA-73843	5-Phosphoribose 1-diphosphate biosynthesis	0.0788986	0.109707	0.074551	0.0866186	0.0777431	0.0568577	0.0604868
R-HSA-174414	Processive synthesis on the C-strand of the telomere	0.142805	0.141594	0.190287	0.128919	0.146741	0.13655	0.136943
R-HSA-174437	Removal of the Flap Intermediate from the C-strand	0.147516	0.148278	0.18988	0.134711	0.151955	0.142784	0.142383
R-HSA-5358508	Mismatch Repair	0.0985863	0.0944086	0.153921	0.0888548	0.097417	0.0828283	0.0873445
R-HSA-5358565	Mismatch repair (MMR) directed by MSH2:MSH6 (MutSalpha)	0.0985863	0.0944086	0.153921	0.0888548	0.097417	0.0828283	0.0873445
R-HSA-5358606	Mismatch repair (MMR) directed by MSH2:MSH3 (MutSbeta)	0.0982665	0.0929842	0.153232	0.0886203	0.0975339	0.0803697	0.0845568
R-HSA-446388	Regulation of cytoskeletal remodeling and cell spreading by IPP complex components	0.100396	0.0881487	0.0965895	0.0786473	0.0947337	0.0754813	0.0954669
R-HSA-351906	Apoptotic cleavage of cell adhesion proteins	0.0636994	0.0491334	0.0589881	0.0573507	0.0491348	0.0549679	0.0591685
R-HSA-191650	Regulation of gap junction activity	0.0217402	0.00804421	-0.00751201	-0.00734819	0.012519	0.00176041	-0.0045801
R-HSA-8934593	Regulation of RUNX1 Expression and Activity	0.115575	0.0998898	0.109124	0.109813	0.112985	0.118599	0.112677
R-HSA-9603381	Activated NTRK3 signals through PI3K	0.104822	0.0910574	0.0817576	0.0980653	0.0888281	0.119507	0.125995
R-HSA-1834941	STING mediated induction of host immune responses	0.125143	0.122741	0.128566	0.133051	0.127523	0.125606	0.13511
R-HSA-3270619	IRF3-mediated induction of type I IFN	0.143741	0.143861	0.153752	0.150911	0.146877	0.141931	0.15192
R-HSA-5627083	RHO GTPases regulate CFTR trafficking	0.244045	0.252186	0.254112	0.241473	0.24661	0.243654	0.272128
R-HSA-211979	Eicosanoids	-0.10296	-0.0953856	-0.0734517	-0.10378	-0.0620808	-0.0717916	-0.0711315
R-HSA-5358493	Synthesis of diphthamide-EEF2	0.0694464	0.0679146	0.0587096	0.0488759	0.0399128	0.0491092	0.0511744
R-HSA-196843	Vitamin B2 (riboflavin) metabolism	0.0867965	0.0933182	0.0819923	0.0617404	0.0927264	0.10198	0.0819456
R-HSA-9010642	ROBO receptors bind AKAP5	0.115211	0.107569	0.100908	0.10353	0.117993	0.111684	0.126021
R-HSA-390651	Dopamine receptors	-0.056987	-0.0210942	-0.0406673	-0.045197	0.0637521	-0.0583571	-0.0884919
R-HSA-111367	SLBP independent Processing of Histone Pre-mRNAs	0.249158	0.254928	0.264865	0.254276	0.249691	0.251655	0.241954
R-HSA-77588	SLBP Dependent Processing of Replication-Dependent Histone Pre-mRNAs	0.250415	0.252222	0.266174	0.251316	0.250168	0.247871	0.239175
R-HSA-5662702	Melanin biosynthesis	0.102811	0.086022	0.0497173	0.0920917	0.0823676	0.029179	-0.0266594
R-HSA-8983432	Interleukin-15 signaling	0.115567	0.107874	0.103689	0.114701	0.114267	0.116682	0.117913
R-HSA-112313	Neurotransmitter uptake and metabolism In glial cells	-0.0495947	-0.095807	-0.0760588	-0.106228	-0.0412304	-0.0819858	0.055591
R-HSA-210455	Astrocytic Glutamate-Glutamine Uptake And Metabolism	-0.0495947	-0.095807	-0.0760588	-0.106228	-0.0412304	-0.0819858	0.055591
R-HSA-5652227	Fructose biosynthesis	0.053347	0.0771202	0.165972	0.0657101	0.105494	0.0890673	0.114321
R-HSA-420597	Nectin/Necl trans heterodimerization	0.0553211	0.0493165	0.04473	0.0559064	0.0544625	0.0524556	0.0268508
R-HSA-8985947	Interleukin-9 signaling	0.165855	0.148535	0.154709	0.147649	0.150433	0.141997	0.154603
R-HSA-5576890	Phase 3 - rapid repolarisation	-0.0703178	-0.0366277	-0.0930161	-0.055379	-0.0837953	-0.0796522	0.0966267
R-HSA-5576893	Phase 2 - plateau phase	-0.103305	-0.0889559	-0.116998	-0.12097	-0.130133	-0.126705	-0.062847
R-HSA-977068	Termination of O-glycan biosynthesis	-0.0794817	-0.0756392	-0.0765536	-0.0704329	-0.0492761	-0.049875	-0.0527401
R-HSA-9025106	Biosynthesis of DPAn-6 SPMs	0.291436	0.30276	0.271856	0.269848	0.230894	0.291299	0.280352
R-HSA-163358	PKA-mediated phosphorylation of key metabolic factors	0.155255	0.141038	0.131695	0.143865	0.16545	0.153213	0.163902
R-HSA-163767	PP2A-mediated dephosphorylation of key metabolic factors	0.11721	0.116962	0.119472	0.12357	0.122002	0.130245	0.104514
R-HSA-77350	Beta oxidation of hexanoyl-CoA to butanoyl-CoA	0.201836	0.202694	0.218562	0.180858	0.208508	0.232637	0.227492
R-HSA-77352	Beta oxidation of butanoyl-CoA to acetyl-CoA	0.0570144	0.0483913	0.107317	0.0151417	0.0871167	0.0751762	0.0865016
R-HSA-9022707	MECP2 regulates transcription factors	0.0980484	0.116811	0.0591212	0.125045	0.0822672	0.108604	0.104181
R-HSA-196783	Coenzyme A biosynthesis	0.137922	0.131571	0.146562	0.123483	0.134743	0.138999	0.119504
R-HSA-9033807	ABO blood group biosynthesis	0.0296897	0.0515686	0.0159271	0.0494808	0.0222613	0.030029	0.0352325
R-HSA-5657655	MGMT-mediated DNA damage reversal	0.315349	0.345226	0.362768	0.309593	0.279899	0.355094	0.322841
R-HSA-73942	DNA Damage Reversal	0.151242	0.115682	0.129613	0.104212	0.119668	0.124365	0.114525
R-HSA-1237112	Methionine salvage pathway	0.124528	0.128429	0.142896	0.115257	0.108385	0.119843	0.133408
R-HSA-209931	Serotonin and melatonin biosynthesis	-0.0577627	-0.0384914	-0.0829651	-0.0478414	-0.0536897	-0.0659787	-0.126055
R-HSA-8941333	RUNX2 regulates genes involved in differentiation of myeloid cells	0.127945	0.106184	0.0918555	0.125259	0.120403	0.134618	0.124247
R-HSA-390450	Folding of actin by CCT/TriC	0.130978	0.135031	0.14835	0.134621	0.133219	0.124246	0.129619
R-HSA-8849472	PTK6 Down-Regulation	0.073406	0.0741206	0.0563053	0.083769	0.0800132	0.0839956	0.0798017
R-HSA-2142696	Synthesis of Hepoxilins (HX) and Trioxilins (TrX)	0.488945	0.491777	0.477159	0.492508	0.405162	0.494427	0.496345
R-HSA-9037628	Rhesus blood group biosynthesis	-0.373385	-0.331183	-0.398688	-0.324221	-0.355016	-0.430738	-0.393092
R-HSA-9026527	Activated NTRK2 signals through PLCG1	0.00257678	-0.0272852	0.00759044	0.00317547	0.0261732	0.0586651	0.0870089
R-HSA-9034793	Activated NTRK3 signals through PLCG1	-0.0221243	-0.0398681	-0.0187695	-0.00621371	0.00991854	0.0477659	0.0714627
R-HSA-425986	Sodium/Proton exchangers	0.030909	0.0160496	-0.0276604	0.0224668	-0.0243364	0.0101132	-0.00674785
R-HSA-9031525	NR1H2 & NR1H3 regulate gene expression to limit cholesterol uptake	0.0510035	0.0540973	0.0109002	0.0564329	0.0352494	0.0570886	0.0559753
R-HSA-9632974	NR1H2 & NR1H3 regulate gene expression linked to gluconeogenesis	0.0900009	0.0903016	0.0713893	0.094271	0.0789917	0.0909686	0.0899036
R-HSA-3134963	DEx/H-box helicases activate type I IFN and inflammatory cytokines production	0.194711	0.190243	0.1757	0.190931	0.181904	0.190291	0.206729
R-HSA-380095	Tachykinin receptors bind tachykinins	0.336614	0.337621	0.352226	0.317423	0.328866	0.308927	0.224883
R-HSA-9025046	NTF3 activates NTRK2 (TRKB) signaling	-0.169378	-0.26357	-0.1934	-0.292895	-0.262004	-0.257465	-0.182336
R-HSA-9034013	NTF3 activates NTRK3 signaling	-0.344282	-0.318445	-0.418983	-0.299923	-0.391625	-0.292213	-0.281322
R-HSA-5660489	MTF1 activates gene expression	0.0479581	0.0671953	0.0446374	0.0285191	0.0480774	0.0374777	0.038463
R-HSA-140179	Amine Oxidase reactions	-0.159885	-0.189352	-0.159695	-0.194228	-0.129425	-0.162323	0.0140895
R-HSA-141333	Biogenic amines are oxidatively deaminated to aldehydes by MAOA and MAOB	-0.147322	-0.153149	-0.130297	-0.169621	-0.13513	-0.136798	0.117215
R-HSA-379397	Enzymatic degradation of dopamine by COMT	-0.0154966	-0.0143006	0.00125326	-0.023861	-0.0140055	-0.0157931	0.0171378
R-HSA-379398	Enzymatic degradation of Dopamine by monoamine oxidase	-0.0105452	-0.00922406	0.00476457	-0.0182921	-0.00806807	-0.0108182	0.0234029
R-HSA-379401	Dopamine clearance from the synaptic cleft	-0.0278532	-0.0278219	-0.0145424	-0.038358	-0.0289065	-0.0270046	0.000768262
R-HSA-351200	Interconversion of polyamines	0.119611	0.114501	0.139043	0.110794	0.132544	0.121477	0.10351
R-HSA-391903	Eicosanoid ligand-binding receptors	0.0222703	0.021316	0.00939283	0.0168141	0.0103352	0.0300174	0.0284174
R-HSA-391908	Prostanoid ligand receptors	-0.122858	-0.155196	-0.19026	-0.137887	-0.252326	-0.0989956	-0.0440682
R-HSA-140180	COX reactions	-0.347798	-0.414197	-0.282032	-0.387206	-0.376635	-0.385325	0.154097
R-HSA-9020958	Interleukin-21 signaling	0.164313	0.148081	0.148942	0.145633	0.144944	0.148466	0.14681
R-HSA-2408508	Metabolism of ingested SeMet, Sec, MeSec into H2Se	-0.0382107	-0.0173437	-0.0491988	-0.038978	-0.0290965	-0.0198551	-0.067056
R-HSA-9024909	BDNF activates NTRK2 (TRKB) signaling	-0.172147	-0.26945	-0.188141	-0.334133	-0.259799	-0.280358	-0.189947
R-HSA-9028335	Activated NTRK2 signals through PI3K	0.0970389	0.0691677	0.0705673	0.0790792	0.0814905	0.0913053	0.119045
R-HSA-9032845	Activated NTRK2 signals through CDK5	0.123361	0.12333	0.140591	0.120643	0.131954	0.124048	0.107655
R-HSA-8964540	Alanine metabolism	-0.33344	-0.335176	-0.257149	-0.338831	-0.339927	-0.410005	-0.411375
R-HSA-74182	Ketone body metabolism	0.0911398	0.00641094	0.174137	0.0414636	0.120666	0.0472971	0.00267222
R-HSA-77108	Utilization of Ketone Bodies	0.0245122	-0.0788733	0.12419	-0.0184201	0.0776555	-0.00921843	-0.133668
R-HSA-77111	Synthesis of Ketone Bodies	0.110007	0.0157473	0.203744	0.0553923	0.152777	0.0513066	0.0282947
R-HSA-390650	Histamine receptors	-0.28117	-0.289535	-0.374229	-0.37546	-0.450658	-0.433634	-0.267643
R-HSA-75157	FasL/ CD95L signaling	0.165242	0.15743	0.155701	0.164145	0.171671	0.151409	0.133745
R-HSA-4755510	SUMOylation of immune response proteins	0.167048	0.167021	0.155231	0.170977	0.163564	0.166164	0.174789
R-HSA-450513	Tristetraprolin (TTP, ZFP36) binds and destabilizes mRNA	0.13515	0.132232	0.125748	0.139235	0.131137	0.131481	0.125623
R-HSA-202670	ERKs are inactivated	0.14714	0.138349	0.149995	0.145905	0.154328	0.147577	0.134547
R-HSA-77285	Beta oxidation of myristoyl-CoA to lauroyl-CoA	0.184092	0.191731	0.203155	0.165806	0.182745	0.213733	0.214326
R-HSA-77310	Beta oxidation of lauroyl-CoA to decanoyl-CoA-CoA	0.19395	0.191841	0.207411	0.170217	0.204667	0.212818	0.213998
R-HSA-8951671	RUNX3 regulates YAP1-mediated transcription	0.0662583	0.0634891	0.040269	0.0678761	0.0512645	0.0597999	0.0532499
R-HSA-111995	phospho-PLA2 pathway	0.195199	0.181808	0.175363	0.187634	0.200437	0.181328	0.174977
R-HSA-163754	Insulin effects increased synthesis of Xylulose-5-Phosphate	0.351135	0.34958	0.353358	0.338886	0.331194	0.349201	0.360906
R-HSA-203754	NOSIP mediated eNOS trafficking	0.0870204	0.0780691	0.0734122	0.0939175	0.0973885	0.084372	0.0827587
R-HSA-888593	Reuptake of GABA	0.0528458	0.0369467	0.117179	0.0265113	0.0413959	0.028239	-0.0367321
R-HSA-217271	FMO oxidises nucleophiles	-0.0773165	-0.0879454	-0.109568	-0.0455458	-0.0975837	-0.0134192	-0.0469293
R-HSA-211163	AKT-mediated inactivation of FOXO1A	0.213498	0.225778	0.223126	0.223788	0.195871	0.210166	0.193436
R-HSA-450385	Butyrate Response Factor 1 (BRF1) binds and destabilizes mRNA	0.15987	0.159261	0.15311	0.163903	0.15232	0.153864	0.143815
R-HSA-109703	PKB-mediated events	0.112265	0.142686	0.0865927	0.145986	0.107401	0.128265	0.175314
R-HSA-165160	PDE3B signalling	0.112265	0.142686	0.0865927	0.145986	0.107401	0.128265	0.175314
R-HSA-165181	Inhibition of TSC complex formation by PKB	0.25064	0.241634	0.232691	0.224994	0.237766	0.244321	0.24986
R-HSA-72200	mRNA Editing: C to U Conversion	0.0651741	0.0248667	0.0891486	0.00703071	0.0641027	0.0223751	0.0997384
R-HSA-75072	mRNA Editing	0.136861	0.105522	0.152091	0.0968086	0.13543	0.1089	0.157178
R-HSA-75094	Formation of the Editosome	0.0651741	0.0248667	0.0891486	0.00703071	0.0641027	0.0223751	0.0997384
R-HSA-8939245	RUNX1 regulates transcription of genes involved in BCR signaling	0.106373	0.096873	0.102674	0.0994049	0.0916659	0.0999137	0.0970231
R-HSA-5625970	RHO GTPases activate KTN1	0.163556	0.153284	0.146722	0.154435	0.157278	0.15227	0.13493
R-HSA-9026357	NTF4 activates NTRK2 (TRKB) signaling	-0.047769	-0.140525	-0.0343568	-0.171772	-0.118248	-0.13002	-0.0806789
R-HSA-3134973	LRR FLII-interacting protein 1 (LRRFIP1) activates type I IFN production	0.110006	0.103569	0.101062	0.113924	0.0910065	0.109358	0.103692
R-HSA-197264	Nicotinamide salvaging	0.0839059	0.0914804	0.073912	0.0790061	0.0873661	0.0770853	0.113585
R-HSA-1483213	Synthesis of PE	0.0739695	0.0767666	0.0535596	0.0804551	0.0785166	0.0846197	0.0898375
R-HSA-9013695	NOTCH4 Intracellular Domain Regulates Transcription	0.154257	0.155551	0.147149	0.161891	0.148114	0.158608	0.152385
R-HSA-112303	Electric Transmission Across Gap Junctions	-0.0378228	-0.0275891	-0.0512517	-0.0427206	-0.0305301	-0.0281673	-0.015827
R-HSA-112307	Transmission across Electrical Synapses	-0.0378228	-0.0275891	-0.0512517	-0.0427206	-0.0305301	-0.0281673	-0.015827
R-HSA-4641265	Repression of WNT target genes	0.141138	0.142335	0.1344	0.150819	0.135603	0.154632	0.14422
R-HSA-2393930	Phosphate bond hydrolysis by NUDT proteins	0.0975642	0.0969857	0.153933	0.0837569	0.107668	0.0686521	0.076504
R-HSA-9645135	STAT5 Activation	0.0818246	0.0680253	0.0663618	0.0702	0.0841442	0.0757016	0.0705477
R-HSA-451307	Activation of Na-permeable kainate receptors	-0.365692	-0.444541	-0.381133	-0.503655	-0.423618	-0.500274	-0.476428
R-HSA-77305	Beta oxidation of palmitoyl-CoA to myristoyl-CoA	0.228176	0.227922	0.25793	0.214103	0.215183	0.25751	0.259209
R-HSA-3249367	STAT6-mediated induction of chemokines	0.186657	0.176925	0.15527	0.179199	0.181738	0.161889	0.182452
R-HSA-399710	Activation of AMPA receptors	0.0827545	0.0655644	0.0553967	0.0538365	0.0605815	0.026407	0.0128283
R-HSA-211736	Stimulation of the cell death response by PAK-2p34	0.168133	0.132443	0.148297	0.157327	0.166027	0.145467	0.154581
R-HSA-139910	Activation of BMF and translocation to mitochondria	0.120266	0.124025	0.0949395	0.126164	0.0976618	0.126244	0.112411
R-HSA-9007892	Interleukin-38 signaling	0.155191	0.15696	0.147334	0.161525	0.138637	0.16358	0.140352
R-HSA-427975	Proton/oligopeptide cotransporters	-0.0163088	-0.042985	-0.0270977	0.00500616	-0.0114621	0.0781166	0.0225651
R-HSA-1912399	Pre-NOTCH Processing in the Endoplasmic Reticulum	0.211837	0.21025	0.203296	0.22324	0.213064	0.223105	0.198268
R-HSA-8941856	RUNX3 regulates NOTCH signaling	0.160536	0.160632	0.157382	0.170303	0.153301	0.164725	0.156065
R-HSA-1296067	Potassium transport channels	-0.0119233	0.0387848	-0.00296939	0.0443582	0.00607583	0.0514847	0.115075
R-HSA-1296053	Classical Kir channels	-0.0642306	-0.0189656	-0.0517565	-0.0357816	-0.0632216	-0.0644678	-0.0579647
R-HSA-8847453	Synthesis of PIPs in the nucleus	0.0652574	0.096777	0.033577	0.0952756	0.0482566	0.0790354	0.0629668
R-HSA-2892245	POU5F1 (OCT4), SOX2, NANOG repress genes related to differentiation	0.0414069	0.0288205	0.107859	0.0896303	0.103426	0.0668986	0.0761445
R-HSA-1483101	Synthesis of PS	0.0698558	0.10761	0.0242565	0.121481	0.0880148	0.113089	0.0937725
R-HSA-1483196	PI and PC transport between ER and Golgi membranes	0.167742	0.172604	0.1778	0.165199	0.153763	0.0797942	0.125913
R-HSA-3296197	Hydroxycarboxylic acid-binding receptors	-0.462719	-0.357881	-0.464153	-0.423004	-0.379175	-0.436183	-0.237012
R-HSA-204626	Hypusine synthesis from eIF5A-lysine	0.10486	0.163295	0.151584	0.13416	0.114814	0.135869	0.0926082
R-HSA-6798163	Choline catabolism	-0.0792343	-0.12738	-0.112693	-0.192026	-0.0479568	-0.153536	0.0357359
R-HSA-8877627	Vitamin E	-0.000968072	-0.0233709	-0.0215653	-0.0259831	-0.00915204	-0.0240146	-0.0163015
R-HSA-9017802	Noncanonical activation of NOTCH3	0.248374	0.252337	0.253866	0.246878	0.242297	0.249399	0.241997
R-HSA-350864	Regulation of thyroid hormone activity	-0.42846	-0.46921	-0.373824	-0.495066	-0.381316	-0.480905	-0.384788
R-HSA-9022927	MECP2 regulates transcription of genes involved in GABA signaling	0.0164866	-0.0127878	0.00236522	-0.0161019	0.0104234	-0.0083453	0.037428
R-HSA-916853	Degradation of GABA	-0.129599	-0.188789	-0.112409	-0.127713	-0.0426366	-0.191843	-0.10029
R-HSA-68881	Mitotic Metaphase/Anaphase Transition	0.094797	0.0844511	0.17293	0.0930963	0.0957536	0.0787689	0.0741828
R-HSA-446199	Synthesis of Dolichyl-phosphate	-0.0783936	-0.0758445	-0.0766328	-0.0930913	-0.0616678	-0.080543	-0.134754
R-HSA-429593	Inositol transporters	0.26754	0.269074	0.283298	0.29641	0.274665	0.282386	0.268142
R-HSA-426117	Cation-coupled Chloride cotransporters	0.0668064	0.0851214	0.00827888	0.0453927	0.00849793	0.0588623	0.0709792
R-HSA-75064	mRNA Editing: A to I Conversion	0.357264	0.345295	0.35136	0.359628	0.353926	0.36161	0.338475
R-HSA-75102	C6 deamination of adenosine	0.357264	0.345295	0.35136	0.359628	0.353926	0.36161	0.338475
R-HSA-77042	Formation of editosomes by ADAR proteins	0.357264	0.345295	0.35136	0.359628	0.353926	0.36161	0.338475
R-HSA-3065676	SUMO is conjugated to E1 (UBA2:SAE1)	0.138333	0.137993	0.135064	0.149759	0.140195	0.14341	0.128538
R-HSA-3065678	SUMO is transferred from E1 to E2 (UBE2I, UBC9)	0.125641	0.124595	0.120973	0.135554	0.124564	0.122877	0.116154
R-HSA-3065679	SUMO is proteolytically processed	0.1284	0.127951	0.126148	0.137764	0.129752	0.133563	0.123893
R-HSA-3215018	Processing and activation of SUMO	0.11512	0.114288	0.111545	0.124849	0.114215	0.112509	0.110393
R-HSA-111452	Activation and oligomerization of BAK protein	0.224882	0.197269	0.189498	0.200291	0.192681	0.207813	0.232287
R-HSA-114294	Activation, translocation and oligomerization of BAX	0.231101	0.192827	0.199123	0.196623	0.20552	0.219792	0.205888
R-HSA-8943723	Regulation of PTEN mRNA translation	0.151349	0.148261	0.156906	0.169662	0.155835	0.159548	0.153023
R-HSA-727802	Transport of nucleotide sugars	0.00617141	0.0258491	0.004017	0.0168752	0.0146627	0.0285929	0.0527173
R-HSA-444411	Rhesus glycoproteins mediate ammonium transport.	-0.0722276	-0.0813975	-0.0785323	-0.0974121	-0.0671737	-0.0876437	-0.0553731
R-HSA-9026395	Biosynthesis of DHA-derived sulfido conjugates	-0.0420134	-0.0034588	-0.0219607	-0.0508575	0.0118701	0.00833228	0.0833679
R-HSA-9026762	Biosynthesis of maresin conjugates in tissue regeneration (MCTR)	-0.0420134	-0.0034588	-0.0219607	-0.0508575	0.0118701	0.00833228	0.0833679
R-HSA-888568	GABA synthesis	-0.00362136	-0.0314131	-0.0109295	-0.0350747	-0.010227	-0.0295793	0.0240336
R-HSA-429958	mRNA decay by 3' to 5' exoribonuclease	0.108915	0.114191	0.110691	0.107653	0.114341	0.103944	0.108961
R-HSA-9603505	NTRK3 as a dependence receptor	0.141444	0.12285	0.153814	0.119223	0.132693	0.146285	0.114581
R-HSA-177135	Conjugation of benzoate with glycine	0.028959	-0.0757519	-0.00547993	-0.0412169	0.0305658	0.0113764	0.0215385
R-HSA-177162	Conjugation of phenylacetate with glutamine	-0.28794	-0.313065	-0.306578	-0.32339	-0.458611	-0.349794	-0.107309
R-HSA-975574	Reactions specific to the hybrid N-glycan synthesis pathway	-0.0827504	-0.0162014	-0.0323768	-0.0509967	-0.0994849	-0.0852523	0.00922657
R-HSA-9667769	Acetylcholine inhibits contraction of outer hair cells	-0.348462	-0.347277	-0.332941	-0.384714	-0.362821	-0.343528	-0.244327
R-HSA-198765	Signalling to ERK5	0.197062	0.192731	0.221474	0.195644	0.201826	0.200198	0.184416
R-HSA-433137	Sodium-coupled sulphate, di- and tri-carboxylate transporters	-0.0399413	-0.0416701	-0.0283079	-0.0535193	-0.0338551	-0.0265366	-0.0283292
R-HSA-391906	Leukotriene receptors	-0.0264503	0.0120743	-0.0835435	-0.0319874	-0.0389093	0.0121028	-0.0213903
R-HSA-435354	Zinc transporters	0.0465142	0.0570454	0.0504328	0.0451402	0.0373984	0.0507283	0.0622093
R-HSA-442380	Zinc influx into cells by the SLC39 gene family	0.018758	0.0297554	0.0236588	0.0139834	0.0160425	0.0216457	0.0772214
R-HSA-8951911	RUNX3 regulates RUNX1-mediated transcription	0.214308	0.202159	0.166239	0.224854	0.17801	0.224947	0.197868
R-HSA-1606341	IRF3 mediated activation of type 1 IFN	0.170622	0.168789	0.147403	0.16808	0.159751	0.151908	0.124101
R-HSA-428643	Organic anion transporters	-0.114431	-0.134591	-0.113472	-0.11653	-0.126436	-0.123041	-0.0989813
R-HSA-71737	Pyrophosphate hydrolysis	0.455139	0.445729	0.465464	0.404888	0.435039	0.392188	0.273321
R-HSA-211994	Sterols are 12-hydroxylated by CYP8B1	-0.383783	-0.478894	-0.458246	-0.503381	-0.210096	-0.499178	-0.475879
R-HSA-9026766	Biosynthesis of protectin and resolvin conjugates in tissue regeneration (PCTR and RCTR)	-0.0355391	-0.0122413	0.0357735	-0.0212846	-0.00955711	0.0348622	0.196703
R-HSA-5263617	Metabolism of ingested MeSeO2H into MeSeH	0.0747564	0.0704598	0.135921	0.053468	0.0744131	0.0572927	0.0623306
R-HSA-428559	Proton-coupled neutral amino acid transporters	-0.0802413	-0.0584967	-0.181662	-0.174055	-0.035841	-0.0949111	-0.213112
R-HSA-373756	SDK interactions	-0.259483	-0.227336	-0.322323	-0.304449	-0.271423	-0.284398	-0.291914
R-HSA-9640463	Wax biosynthesis	0.022108	0.0534671	0.0165697	0.0507152	0.00485231	0.0546986	0.0965914
R-HSA-9673163	Oleoyl-phe metabolism	-0.284194	-0.39566	-0.41841	-0.428278	-0.393193	-0.367519	-0.30402
R-HSA-6793080	rRNA modification in the mitochondrion	0.0879876	0.084243	0.0807854	0.0692396	0.094787	0.0877294	0.110422
R-HSA-112122	ALKBH2 mediated reversal of alkylation damage	0.0378187	0.0626024	-0.0263702	0.0521996	0.0229234	0.0906372	0.0901917
R-HSA-73943	Reversal of alkylation damage by DNA dioxygenases	0.133541	0.0903365	0.103818	0.0816015	0.102304	0.0989175	0.0916265
R-HSA-435368	Zinc efflux and compartmentalization by the SLC30 family	0.0539667	0.0672325	0.059437	0.0548218	0.0432166	0.0585378	0.0598646
R-HSA-5576894	Phase 1 - inactivation of fast Na+ channels	0.107501	0.0578533	-0.0168517	-0.0155355	0.00375765	-0.0444434	-0.0131401
R-HSA-141334	PAOs oxidise polyamines to amines	-0.190241	-0.283259	-0.236256	-0.251444	-0.115471	-0.226635	-0.305405
R-HSA-6814848	Glycerophospholipid catabolism	-0.132514	-0.136883	-0.167128	-0.128983	-0.121055	-0.121436	-0.102137
R-HSA-880009	Interconversion of 2-oxoglutarate and 2-hydroxyglutarate	-0.16645	-0.179007	-0.176632	-0.118141	-0.105143	-0.14404	-0.158706
R-HSA-6806664	Metabolism of vitamin K	0.0647356	0.0876592	0.0968705	0.0638146	0.0735983	0.0722326	0.0768004
R-HSA-426048	Arachidonate production from DAG	-0.118648	-0.0905917	-0.0545323	-0.0525516	0.00390961	0.00156575	0.090505
R-HSA-112126	ALKBH3 mediated reversal of alkylation damage	0.149457	0.0961465	0.147385	0.0830338	0.137202	0.112191	0.0923
R-HSA-426496	Post-transcriptional silencing by small RNAs	0.215086	0.210472	0.221508	0.239792	0.217324	0.225529	0.224165
R-HSA-8948700	Competing endogenous RNAs (ceRNAs) regulate PTEN translation	0.216351	0.215411	0.220522	0.239553	0.220419	0.224494	0.223046
R-HSA-1855191	Synthesis of IPs in the nucleus	0.0856567	0.0768849	0.0574946	0.0785351	0.0770073	0.0867342	0.0572348
R-HSA-9636003	NEIL3-mediated resolution of ICLs	-0.278438	-0.377844	0.0925994	-0.316903	-0.253769	-0.451119	-0.424714
R-HSA-9014826	Interleukin-36 pathway	0.00180468	-0.000999962	-0.000589764	-0.0133294	-0.012191	0.0146244	0.0170033
R-HSA-351143	Agmatine biosynthesis	-0.271823	-0.297663	-0.221941	-0.313701	-0.225311	-0.349004	-0.286341
R-HSA-163316	Mitochondrial transcription termination	-0.0530294	-0.0846654	-0.0779272	-0.101813	-0.00984764	-0.0552167	-0.0541103
R-HSA-1299287	Tandem pore domain halothane-inhibited K+ channel (THIK)	0.0955231	0.0770672	0.136364	0.067291	0.0649155	-0.0207857	-0.0623572
R-HSA-1483152	Hydrolysis of LPE	0.192964	0.140317	0.0463116	0.148098	0.123204	0.12845	0.0853581
R-HSA-1483076	Synthesis of CL	0.104934	0.116354	0.0567839	0.0469164	0.0200548	0.122476	0.140292
R-HSA-1855231	Synthesis of IPs in the ER lumen	0.0651364	-0.0118841	-0.021388	0.0198564	0.0182629	-0.0240343	0.126036
