# Supplementary material for: Integrating microarray-based spatial transcriptomics and single-cell RNA-sequencing reveals tissue architecture in oesophageal squamous cell carcinoma
Source: Research Square preprint supplement (doi:10.21203/rs.3.rs-1539014/v1), 2022-04-14
Supplement: Supplementary file 2 [file 2a962f8459a99e6949598c21.xlsx]

## Sheet: endothelialcell
Table S3 GSVA results of endothelial cell subsets.
Pathway	Name	C0	C1	C2
R-HSA-166658	Complement cascade	0.140709	0.165721	0.167504
R-HSA-166663	Initial triggering of complement	0.102732	0.0909052	0.199916
R-HSA-166786	Creation of C4 and C2 activators	0.165052	0.149234	0.267787
R-HSA-173623	Classical antibody-mediated complement activation	0.224719	0.224116	0.382995
R-HSA-198933	Immunoregulatory interactions between a Lymphoid and a non-Lymphoid cell	0.192044	0.184895	0.220723
R-HSA-202733	Cell surface interactions at the vascular wall	0.114195	0.105326	0.107811
R-HSA-2029480	Fcgamma receptor (FCGR) dependent phagocytosis	0.108776	0.100675	0.087079
R-HSA-2029481	FCGR activation	0.123156	0.120345	0.12752
R-HSA-2029482	Regulation of actin dynamics for phagocytic cup formation	0.117523	0.111415	0.0929678
R-HSA-2029485	Role of phospholipids in phagocytosis	0.0951854	0.066649	0.0834316
R-HSA-2168880	Scavenging of heme from plasma	0.166302	0.166329	0.234882
R-HSA-2173782	Binding and Uptake of Ligands by Scavenger Receptors	0.129548	0.122769	0.1435
R-HSA-2454202	Fc epsilon receptor (FCERI) signaling	0.147816	0.136886	0.130805
R-HSA-2730905	Role of LAT2/NTAL/LAB on calcium mobilization	0.142313	0.130401	0.128566
R-HSA-2871796	FCERI mediated MAPK activation	0.110299	0.105206	0.088578
R-HSA-2871809	FCERI mediated Ca+2 mobilization	0.076221	0.0744979	0.0752336
R-HSA-2871837	FCERI mediated NF-kB activation	0.171529	0.163525	0.160499
R-HSA-5690714	CD22 mediated BCR regulation	0.121922	0.135384	0.117065
R-HSA-977606	Regulation of Complement cascade	0.157508	0.185331	0.185049
R-HSA-983695	Antigen activates B Cell Receptor (BCR) leading to generation of second messengers	0.117974	0.10488	0.101492
R-HSA-983705	Signaling by the B Cell Receptor (BCR)	0.153609	0.142584	0.13678
R-HSA-9013106	RHOC GTPase cycle	0.134143	0.128334	0.123652
R-HSA-202403	TCR signaling	0.147665	0.13592	0.126057
R-HSA-202424	Downstream TCR signaling	0.161886	0.149504	0.14378
R-HSA-202427	Phosphorylation of CD3 and TCR zeta chains	0.154974	0.127395	0.124758
R-HSA-202430	Translocation of ZAP-70 to Immunological synapse	0.159652	0.147954	0.138412
R-HSA-202433	Generation of second messenger molecules	0.0953929	0.0807994	0.0629407
R-HSA-388841	Costimulation by the CD28 family	0.12087	0.116621	0.0930393
R-HSA-389948	PD-1 signaling	0.115493	0.0955133	0.0748753
R-HSA-6805567	Keratinization	0.0904649	0.0924298	0.107189
R-HSA-6809371	Formation of the cornified envelope	0.0919347	0.101164	0.1107
R-HSA-5617833	Cilium Assembly	0.0860426	0.090538	0.0870108
R-HSA-5620924	Intraflagellar transport	0.139878	0.153375	0.135819
R-HSA-8852135	Protein ubiquitination	0.141718	0.141107	0.137021
R-HSA-8866654	E3 ubiquitin ligases ubiquitinate target proteins	0.14555	0.145661	0.137421
R-HSA-6791312	TP53 Regulates Transcription of Cell Cycle Genes	0.116737	0.121908	0.126104
R-HSA-6804116	TP53 Regulates Transcription of Genes Involved in G1 Cell Cycle Arrest	0.100524	0.106628	0.120647
R-HSA-8866652	Synthesis of active ubiquitin: roles of E1 and E2 enzymes	0.187719	0.183221	0.159096
R-HSA-1660662	Glycosphingolipid metabolism	0.104817	0.0995514	0.0740828
R-HSA-428157	Sphingolipid metabolism	0.102782	0.0989474	0.0928449
R-HSA-1989781	PPARA activates gene expression	0.0921296	0.0877096	0.0713925
R-HSA-381340	Transcriptional regulation of white adipocyte differentiation	0.126149	0.115613	0.111931
R-HSA-400206	Regulation of lipid metabolism by PPARalpha	0.0926062	0.0893688	0.0719521
R-HSA-9696270	RND2 GTPase cycle	0.111775	0.103616	0.0914041
R-HSA-373760	L1CAM interactions	0.151444	0.146215	0.141478
R-HSA-437239	Recycling pathway of L1	0.167895	0.160456	0.158294
R-HSA-189200	Cellular hexose transport	0.0647667	0.0315459	0.0400385
R-HSA-425407	SLC-mediated transmembrane transport	0.0769747	0.0689103	0.0764924
R-HSA-169911	Regulation of Apoptosis	0.206113	0.201634	0.185258
R-HSA-211728	Regulation of PAK-2p34 activity by PS-GAP/RHG10	0.125622	0.149496	0.048296
R-HSA-8980692	RHOA GTPase cycle	0.124403	0.121336	0.108774
R-HSA-9013148	CDC42 GTPase cycle	0.137131	0.123539	0.110523
R-HSA-9013149	RAC1 GTPase cycle	0.133086	0.121053	0.103027
R-HSA-2672351	Stimuli-sensing channels	0.163064	0.165844	0.144403
R-HSA-983712	Ion channel transport	0.152279	0.15411	0.136901
R-HSA-977225	Amyloid fiber formation	0.137643	0.134746	0.127792
R-HSA-193648	NRAGE signals death through JNK	0.107448	0.0987819	0.0825962
R-HSA-193704	p75 NTR receptor-mediated signalling	0.139276	0.133883	0.113342
R-HSA-204998	Cell death signalling via NRAGE, NRIF and NADE	0.127527	0.125225	0.10219
R-HSA-416482	G alpha (12/13) signalling events	0.130359	0.127138	0.105311
R-HSA-1221632	Meiotic synapsis	0.0832535	0.0930558	0.0912386
R-HSA-1474165	Reproduction	0.0753661	0.0882741	0.0861241
R-HSA-1500620	Meiosis	0.0734507	0.0879507	0.0848208
R-HSA-9013406	RHOQ GTPase cycle	0.162476	0.16312	0.147658
R-HSA-9013408	RHOG GTPase cycle	0.171243	0.167636	0.158367
R-HSA-75105	Fatty acyl-CoA biosynthesis	0.108493	0.0944927	0.0908728
R-HSA-75876	Synthesis of very long-chain fatty acyl-CoAs	0.139933	0.117957	0.102043
R-HSA-8978868	Fatty acid metabolism	0.059651	0.0642711	0.0538135
R-HSA-3000471	Scavenging by Class B Receptors	0.139745	0.168835	0.175311
R-HSA-6811434	COPI-dependent Golgi-to-ER retrograde traffic	0.0995277	0.115019	0.115585
R-HSA-6811442	Intra-Golgi and retrograde Golgi-to-ER traffic	0.107279	0.110646	0.113571
R-HSA-8856688	Golgi-to-ER retrograde transport	0.108173	0.122153	0.116561
R-HSA-71064	Lysine catabolism	0.0688665	0.0429507	0.106481
R-HSA-71291	Metabolism of amino acids and derivatives	0.156907	0.156258	0.162995
R-HSA-6782315	tRNA modification in the nucleus and cytosol	-0.0119818	0.0196484	-0.00336998
R-HSA-6782861	Synthesis of wybutosine at G37 of tRNA(Phe)	-0.128345	-0.111805	-0.090745
R-HSA-72306	tRNA processing	0.0509416	0.0635997	0.0713689
R-HSA-8876198	RAB GEFs exchange GTP for GDP on RABs	0.107008	0.107051	0.0751359
R-HSA-9007101	Rab regulation of trafficking	0.0948977	0.0998275	0.0752981
R-HSA-446193	Biosynthesis of the N-glycan precursor (dolichol lipid-linked oligosaccharide, LLO) and transfer to a nascent protein	0.061749	0.0583403	0.0741289
R-HSA-446219	Synthesis of substrates in N-glycan biosythesis	0.0623536	0.0614048	0.0690013
R-HSA-6787639	GDP-fucose biosynthesis	-0.0455624	-0.00416892	-0.0546134
R-HSA-5173105	O-linked glycosylation	0.0146228	0.0186044	-0.00464039
R-HSA-5173214	O-glycosylation of TSR domain-containing proteins	0.0600905	0.00745487	0.0286337
R-HSA-381753	Olfactory Signaling Pathway	0.0906793	0.103793	0.0770141
R-HSA-9709957	Sensory Perception	0.0924004	0.0944069	0.095801
R-HSA-8873719	RAB geranylgeranylation	0.107864	0.114331	0.0900508
R-HSA-5685942	HDR through Homologous Recombination (HRR)	0.091948	0.101846	0.0970029
R-HSA-5693537	Resolution of D-Loop Structures	0.0507166	0.0590341	0.0667346
R-HSA-5693538	Homology Directed Repair	0.0848912	0.0916769	0.0840781
R-HSA-5693567	HDR through Homologous Recombination (HRR) or Single Strand Annealing (SSA)	0.0859973	0.09386	0.0851909
R-HSA-5693568	Resolution of D-loop Structures through Holliday Junction Intermediates	0.0524486	0.0599492	0.0687988
R-HSA-6783310	Fanconi Anemia Pathway	0.0932097	0.106307	0.0790019
R-HSA-9659379	Sensory processing of sound	0.0933789	0.0912407	0.0938689
R-HSA-9662360	Sensory processing of sound by inner hair cells of the cochlea	0.103171	0.105538	0.10711
R-HSA-9662361	Sensory processing of sound by outer hair cells of the cochlea	0.109729	0.100976	0.109727
R-HSA-8964572	Lipid particle organization	0.0605061	0.0669416	0.0490553
R-HSA-917729	Endosomal Sorting Complex Required For Transport (ESCRT)	0.112259	0.116993	0.102672
R-HSA-9615710	Late endosomal microautophagy	0.152919	0.156966	0.142341
R-HSA-1168372	Downstream signaling events of B Cell Receptor (BCR)	0.174831	0.163193	0.157765
R-HSA-1169091	Activation of NF-kappaB in B cells	0.172435	0.162843	0.160559
R-HSA-1234174	Cellular response to hypoxia	0.19733	0.183645	0.181201
R-HSA-1234176	Oxygen-dependent proline hydroxylation of Hypoxia-inducible Factor Alpha	0.200635	0.193473	0.18518
R-HSA-1236974	ER-Phagosome pathway	0.173392	0.169538	0.173002
R-HSA-1236975	Antigen processing-Cross presentation	0.166728	0.164337	0.166992
R-HSA-1236978	Cross-presentation of soluble exogenous antigens (endosomes)	0.209754	0.204432	0.214022
R-HSA-174113	SCF-beta-TrCP mediated degradation of Emi1	0.174858	0.169481	0.170805
R-HSA-174143	APC/C-mediated degradation of cell cycle proteins	0.140258	0.136398	0.147983
R-HSA-174154	APC/C:Cdc20 mediated degradation of Securin	0.191694	0.184104	0.188902
R-HSA-174178	APC/C:Cdh1 mediated degradation of Cdc20 and other APC/C:Cdh1 targeted proteins in late mitosis/early G1	0.164103	0.158195	0.168937
R-HSA-174184	Cdc20:Phospho-APC/C mediated degradation of Cyclin A	0.173261	0.165832	0.183185
R-HSA-176408	Regulation of APC/C activators between G1/S and early anaphase	0.142995	0.139328	0.15088
R-HSA-176409	APC/C:Cdc20 mediated degradation of mitotic proteins	0.171454	0.164406	0.183113
R-HSA-176814	Activation of APC/C and APC/C:Cdc20 mediated degradation of mitotic proteins	0.157986	0.151277	0.171645
R-HSA-179419	APC:Cdc20 mediated degradation of cell cycle proteins prior to satisfation of the cell cycle checkpoint	0.173732	0.166297	0.183248
R-HSA-195253	Degradation of beta-catenin by the destruction complex	0.13409	0.127978	0.11636
R-HSA-211733	Regulation of activated PAK-2p34 by proteasome mediated degradation	0.210069	0.204691	0.19112
R-HSA-2467813	Separation of Sister Chromatids	0.139531	0.136336	0.150023
R-HSA-2555396	Mitotic Metaphase and Anaphase	0.136268	0.130477	0.14491
R-HSA-349425	Autodegradation of the E3 ubiquitin ligase COP1	0.181004	0.176426	0.174027
R-HSA-350562	Regulation of ornithine decarboxylase (ODC)	0.21415	0.203305	0.217637
R-HSA-351202	Metabolism of polyamines	0.19899	0.189507	0.202621
R-HSA-376176	Signaling by ROBO receptors	0.191495	0.187157	0.169233
R-HSA-382556	ABC-family proteins mediated transport	0.193667	0.184129	0.188787
R-HSA-3858494	Beta-catenin independent WNT signaling	0.167912	0.161016	0.155753
R-HSA-4086400	PCP/CE pathway	0.171592	0.167197	0.160192
R-HSA-450408	AUF1 (hnRNP D0) binds and destabilizes mRNA	0.180852	0.178599	0.16651
R-HSA-450531	Regulation of mRNA stability by proteins that bind AU-rich elements	0.16474	0.156349	0.144583
R-HSA-453276	Regulation of mitotic cell cycle	0.140258	0.136398	0.147983
R-HSA-4608870	Asymmetric localization of PCP proteins	0.184019	0.178092	0.170411
R-HSA-4641257	Degradation of AXIN	0.184734	0.179426	0.166797
R-HSA-4641258	Degradation of DVL	0.195407	0.188293	0.1817
R-HSA-5358346	Hedgehog ligand biogenesis	0.181699	0.172022	0.175259
R-HSA-5358351	Signaling by Hedgehog	0.122018	0.117778	0.116236
R-HSA-5607761	Dectin-1 mediated noncanonical NF-kB signaling	0.207309	0.196262	0.196571
R-HSA-5607764	CLEC7A (Dectin-1) signaling	0.167896	0.159519	0.160616
R-HSA-5610780	Degradation of GLI1 by the proteasome	0.164116	0.159856	0.157966
R-HSA-5610783	Degradation of GLI2 by the proteasome	0.161945	0.152957	0.151622
R-HSA-5610785	GLI3 is processed to GLI3R by the proteasome	0.161607	0.152785	0.151266
R-HSA-5610787	Hedgehog 'off' state	0.139032	0.134815	0.133635
R-HSA-5621481	C-type lectin receptors (CLRs)	0.16462	0.158546	0.15589
R-HSA-5632684	Hedgehog 'on' state	0.140022	0.138704	0.123917
R-HSA-5658442	Regulation of RAS by GAPs	0.194307	0.181805	0.173395
R-HSA-5668541	TNFR2 non-canonical NF-kB pathway	0.14	0.13356	0.124286
R-HSA-5676590	NIK-->noncanonical NF-kB signaling	0.203063	0.19659	0.194979
R-HSA-5687128	MAPK6/MAPK4 signaling	0.160829	0.159593	0.149922
R-HSA-5689603	UCH proteinases	0.167053	0.160452	0.155671
R-HSA-68827	CDT1 association with the CDC6:ORC:origin complex	0.184453	0.18018	0.183039
R-HSA-68867	Assembly of the pre-replicative complex	0.165941	0.166335	0.169241
R-HSA-68882	Mitotic Anaphase	0.136268	0.130477	0.14491
R-HSA-68949	Orc1 removal from chromatin	0.148251	0.149658	0.155645
R-HSA-69002	DNA Replication Pre-Initiation	0.134882	0.141471	0.139308
R-HSA-69017	CDK-mediated phosphorylation and removal of Cdc6	0.171156	0.165099	0.176395
R-HSA-69052	Switching of origins to a post-replicative state	0.142311	0.143689	0.15292
R-HSA-69239	Synthesis of DNA	0.125354	0.130822	0.137704
R-HSA-69242	S Phase	0.121808	0.127693	0.122824
R-HSA-69306	DNA Replication	0.117953	0.125892	0.128631
R-HSA-69541	Stabilization of p53	0.182428	0.176302	0.173755
R-HSA-69563	p53-Dependent G1 DNA Damage Response	0.164864	0.16045	0.162556
R-HSA-69580	p53-Dependent G1/S DNA damage checkpoint	0.164864	0.16045	0.162556
R-HSA-69601	Ubiquitin Mediated Degradation of Phosphorylated Cdc25A	0.212636	0.205424	0.199281
R-HSA-69610	p53-Independent DNA Damage Response	0.212636	0.205424	0.199281
R-HSA-69613	p53-Independent G1/S DNA damage checkpoint	0.212636	0.205424	0.199281
R-HSA-69615	G1/S DNA Damage Checkpoints	0.16566	0.161498	0.164019
R-HSA-75815	Ubiquitin-dependent degradation of Cyclin D	0.198362	0.191555	0.184404
R-HSA-8852276	The role of GTSE1 in G2/M progression after G2 checkpoint	0.15272	0.14969	0.14951
R-HSA-8854050	FBXL7 down-regulates AURKA during mitotic entry and in early mitosis	0.173569	0.172086	0.16974
R-HSA-8932339	ROS sensing by NFE2L2	0.202838	0.191908	0.191815
R-HSA-8939236	RUNX1 regulates transcription of genes involved in differentiation of HSCs	0.155897	0.154431	0.143869
R-HSA-8939902	Regulation of RUNX2 expression and activity	0.201873	0.196348	0.192762
R-HSA-8948751	Regulation of PTEN stability and activity	0.143342	0.138258	0.125892
R-HSA-8951664	Neddylation	0.148272	0.143367	0.138806
R-HSA-9010553	Regulation of expression of SLITs and ROBOs	0.236566	0.236409	0.21643
R-HSA-9020702	Interleukin-1 signaling	0.163625	0.157917	0.157215
R-HSA-9707564	Cytoprotection by HMOX1	0.165228	0.155867	0.151264
R-HSA-9707587	Regulation of HMOX1 expression and activity	0.174263	0.166541	0.167327
R-HSA-9711123	Cellular response to chemical stress	0.153787	0.149568	0.145075
R-HSA-418597	G alpha (z) signalling events	0.10054	0.107978	0.0945387
R-HSA-429914	Deadenylation-dependent mRNA decay	0.174918	0.172372	0.156854
R-HSA-429947	Deadenylation of mRNA	0.213376	0.211469	0.192117
R-HSA-6804115	TP53 regulates transcription of additional cell cycle genes whose exact role in the p53 pathway remain uncertain	0.139125	0.139563	0.150966
R-HSA-70921	Histidine catabolism	0.00941954	-0.0112349	-0.0523443
R-HSA-74158	RNA Polymerase III Transcription	0.0827678	0.0913024	0.0769287
R-HSA-749476	RNA Polymerase III Abortive And Retractive Initiation	0.0827678	0.0913024	0.0769287
R-HSA-76046	RNA Polymerase III Transcription Initiation	0.0736756	0.082196	0.0722555
R-HSA-76061	RNA Polymerase III Transcription Initiation From Type 1 Promoter	0.086424	0.094905	0.0927551
R-HSA-76066	RNA Polymerase III Transcription Initiation From Type 2 Promoter	0.0845046	0.0926973	0.0904145
R-HSA-76071	RNA Polymerase III Transcription Initiation From Type 3 Promoter	0.0728416	0.0824132	0.0675927
R-HSA-163125	Post-translational modification: synthesis of GPI-anchored proteins	0.00469092	-0.00104947	0.0268425
R-HSA-70171	Glycolysis	0.103171	0.0969562	0.103162
R-HSA-70326	Glucose metabolism	0.100064	0.0971069	0.106054
R-HSA-71387	Metabolism of carbohydrates	0.0927364	0.0971614	0.095916
R-HSA-163560	Triglyceride catabolism	0.129533	0.132246	0.120306
R-HSA-8979227	Triglyceride metabolism	0.126456	0.126388	0.116755
R-HSA-5663213	RHO GTPases Activate WASPs and WAVEs	0.150938	0.138997	0.114911
R-HSA-156580	Phase II - Conjugation of compounds	0.0726131	0.0976229	0.110942
R-HSA-156590	Glutathione conjugation	0.0714024	0.114547	0.123811
R-HSA-174403	Glutathione synthesis and recycling	-0.0164113	-0.0241249	0.0364575
R-HSA-211859	Biological oxidations	0.0624285	0.0776599	0.0811734
R-HSA-5423646	Aflatoxin activation and detoxification	0.0823669	0.135612	0.0750836
R-HSA-977347	Serine biosynthesis	-0.00359668	0.0743083	0.0939179
R-HSA-1474228	Degradation of the extracellular matrix	0.13847	0.126732	0.151582
R-HSA-1445148	Translocation of SLC2A4 (GLUT4) to the plasma membrane	0.121846	0.124326	0.109703
R-HSA-157858	Gap junction trafficking and regulation	0.161965	0.166409	0.166398
R-HSA-1632852	Macroautophagy	0.138452	0.136528	0.12553
R-HSA-190828	Gap junction trafficking	0.159278	0.164634	0.164815
R-HSA-190840	Microtubule-dependent trafficking of connexons from Golgi to the plasma membrane	0.226838	0.235945	0.244562
R-HSA-190861	Gap junction assembly	0.149459	0.155554	0.170747
R-HSA-190872	Transport of connexons to the plasma membrane	0.205164	0.185656	0.216539
R-HSA-199977	ER to Golgi Anterograde Transport	0.0930723	0.0986645	0.0857784
R-HSA-2132295	MHC class II antigen presentation	0.154145	0.159925	0.158453
R-HSA-2500257	Resolution of Sister Chromatid Cohesion	0.0967665	0.0999135	0.119706
R-HSA-2995410	Nuclear Envelope (NE) Reassembly	0.117881	0.112777	0.125061
R-HSA-3371497	HSP90 chaperone cycle for steroid hormone receptors (SHR) in the presence of ligand	0.127268	0.120257	0.112948
R-HSA-380320	Recruitment of NuMA to mitotic centrosomes	0.10204	0.10148	0.104892
R-HSA-389958	Cooperation of Prefoldin and TriC/CCT in actin and tubulin folding	0.197212	0.200844	0.211327
R-HSA-389960	Formation of tubulin folding intermediates by CCT/TriC	0.185744	0.190422	0.197458
R-HSA-389977	Post-chaperonin tubulin folding pathway	0.239474	0.247504	0.244761
R-HSA-390466	Chaperonin-mediated protein folding	0.141629	0.143518	0.14384
R-HSA-391251	Protein folding	0.142801	0.144688	0.143683
R-HSA-438064	Post NMDA receptor activation events	0.122668	0.117344	0.100561
R-HSA-442755	Activation of NMDA receptors and postsynaptic events	0.117226	0.113375	0.0946518
R-HSA-5626467	RHO GTPases activate IQGAPs	0.157948	0.149462	0.153389
R-HSA-5663220	RHO GTPases Activate Formins	0.119564	0.116668	0.125195
R-HSA-6807878	COPI-mediated anterograde transport	0.0971356	0.100296	0.090274
R-HSA-6811436	COPI-independent Golgi-to-ER retrograde traffic	0.172893	0.174888	0.165037
R-HSA-68877	Mitotic Prometaphase	0.0907979	0.0923136	0.106381
R-HSA-8955332	Carboxyterminal post-translational modifications of tubulin	0.148714	0.154806	0.168846
R-HSA-948021	Transport to the Golgi and subsequent modification	0.0916917	0.0972629	0.0837403
R-HSA-9609736	Assembly and cell surface presentation of NMDA receptors	0.0780688	0.0857765	0.0784875
R-HSA-9619483	Activation of AMPK downstream of NMDARs	0.165632	0.170935	0.144908
R-HSA-9646399	Aggrephagy	0.147657	0.146862	0.137448
R-HSA-9648025	EML4 and NUDC in mitotic spindle formation	0.092749	0.0944815	0.115765
R-HSA-9663891	Selective autophagy	0.136946	0.135587	0.124767
R-HSA-9668328	Sealing of the nuclear envelope (NE) by ESCRT-III	0.186384	0.183986	0.178708
R-HSA-983189	Kinesins	0.0649514	0.0785671	0.092753
R-HSA-983231	Factors involved in megakaryocyte development and platelet production	0.1004	0.103853	0.0925261
R-HSA-9639288	Amino acids regulate mTORC1	0.103488	0.102796	0.110155
R-HSA-9711097	Cellular response to starvation	0.207495	0.206292	0.194087
R-HSA-9013404	RAC2 GTPase cycle	0.149748	0.138805	0.126186
R-HSA-9013423	RAC3 GTPase cycle	0.148483	0.132603	0.123276
R-HSA-5620920	Cargo trafficking to the periciliary membrane	0.0845367	0.0922326	0.0816047
R-HSA-5624138	Trafficking of myristoylated proteins to the cilium	0.0667121	0.058192	0.0179464
R-HSA-389661	Glyoxylate metabolism and glycine degradation	0.0283445	0.0522658	0.0598933
R-HSA-112382	Formation of RNA Pol II elongation complex	0.120243	0.116598	0.111869
R-HSA-674695	RNA Polymerase II Pre-transcription Events	0.117904	0.113465	0.107658
R-HSA-6796648	TP53 Regulates Transcription of DNA Repair Genes	0.111414	0.108585	0.110112
R-HSA-75955	RNA Polymerase II Transcription Elongation	0.120243	0.116598	0.111869
R-HSA-2172127	DAP12 interactions	0.0875102	0.0774625	0.0747425
R-HSA-1442490	Collagen degradation	0.146324	0.129865	0.167693
R-HSA-1474290	Collagen formation	0.114038	0.100823	0.133365
R-HSA-1650814	Collagen biosynthesis and modifying enzymes	0.093634	0.0695999	0.130177
R-HSA-186797	Signaling by PDGF	0.111168	0.0950129	0.0834014
R-HSA-2022090	Assembly of collagen fibrils and other multimeric structures	0.17129	0.16286	0.189787
R-HSA-216083	Integrin cell surface interactions	0.200135	0.187722	0.216571
R-HSA-3000178	ECM proteoglycans	0.170073	0.154263	0.171948
R-HSA-375165	NCAM signaling for neurite out-growth	0.126328	0.102935	0.100055
R-HSA-419037	NCAM1 interactions	0.0749378	0.0470105	0.0963585
R-HSA-8948216	Collagen chain trimerization	0.156299	0.119606	0.217354
R-HSA-9013026	RHOB GTPase cycle	0.118266	0.113819	0.109736
R-HSA-9013405	RHOD GTPase cycle	0.150498	0.129767	0.13956
R-HSA-9013409	RHOJ GTPase cycle	0.13662	0.134435	0.116469
R-HSA-9035034	RHOF GTPase cycle	0.140109	0.119882	0.136335
R-HSA-5362798	Release of Hh-Np from the secreting cell	0.101341	0.105169	0.131651
R-HSA-1169408	ISG15 antiviral mechanism	0.131439	0.117978	0.105052
R-HSA-1169410	Antiviral mechanism by IFN-stimulated genes	0.133015	0.118368	0.105625
R-HSA-159227	Transport of the SLBP independent Mature mRNA	0.0999078	0.106482	0.0991161
R-HSA-159230	Transport of the SLBP Dependant Mature mRNA	0.0990154	0.105891	0.0986632
R-HSA-159231	Transport of Mature mRNA Derived from an Intronless Transcript	0.100679	0.106829	0.102515
R-HSA-159234	Transport of Mature mRNAs Derived from Intronless Transcripts	0.0998297	0.10627	0.102044
R-HSA-159236	Transport of Mature mRNA derived from an Intron-Containing Transcript	0.123774	0.126495	0.110355
R-HSA-170822	Regulation of Glucokinase by Glucokinase Regulatory Protein	0.0375644	0.0399535	0.0658291
R-HSA-191859	snRNP Assembly	0.125412	0.127742	0.12699
R-HSA-194441	Metabolism of non-coding RNA	0.125412	0.127742	0.12699
R-HSA-211000	Gene Silencing by RNA	0.093669	0.100835	0.0944894
R-HSA-2980766	Nuclear Envelope Breakdown	0.0830791	0.0785836	0.111196
R-HSA-3108214	SUMOylation of DNA damage response and repair proteins	0.0685742	0.0710995	0.0608426
R-HSA-3232142	SUMOylation of ubiquitinylation proteins	0.0871596	0.0872121	0.0816222
R-HSA-3301854	Nuclear Pore Complex (NPC) Disassembly	0.0608093	0.0610333	0.118089
R-HSA-3371453	Regulation of HSF1-mediated heat shock response	0.0859564	0.0825656	0.0792727
R-HSA-3371556	Cellular response to heat stress	0.0919022	0.0875026	0.0817208
R-HSA-4085377	SUMOylation of SUMOylation proteins	0.0506298	0.0526944	0.0448034
R-HSA-4551638	SUMOylation of chromatin organization proteins	0.0802588	0.0776693	0.063773
R-HSA-4570464	SUMOylation of RNA binding proteins	0.0882466	0.0882815	0.0764792
R-HSA-4615885	SUMOylation of DNA replication proteins	0.0923621	0.101664	0.108141
R-HSA-5578749	Transcriptional regulation by small RNAs	0.10159	0.109729	0.110007
R-HSA-6784531	tRNA processing in the nucleus	0.0698534	0.0822648	0.0964192
R-HSA-68875	Mitotic Prophase	0.0787942	0.0803546	0.0824366
R-HSA-72202	Transport of Mature Transcript to Cytoplasm	0.124308	0.126748	0.112628
R-HSA-72203	Processing of Capped Intron-Containing Pre-mRNA	0.145069	0.146129	0.132755
R-HSA-5635838	Activation of SMO	0.0509663	0.0540308	0.0513527
R-HSA-2565942	Regulation of PLK1 Activity at G2/M Transition	0.105537	0.107973	0.0964887
R-HSA-380259	Loss of Nlp from mitotic centrosomes	0.101124	0.0987574	0.102057
R-HSA-380270	Recruitment of mitotic centrosome proteins and complexes	0.0983591	0.097694	0.099863
R-HSA-380284	Loss of proteins required for interphase microtubule organization from the centrosome	0.101124	0.0987574	0.102057
R-HSA-380287	Centrosome maturation	0.0983591	0.097694	0.099863
R-HSA-5620912	Anchoring of the basal body to the plasma membrane	0.0942362	0.0949602	0.0928302
R-HSA-8854518	AURKA Activation by TPX2	0.100176	0.0982555	0.102794
R-HSA-977443	GABA receptor activation	0.0728507	0.0857017	0.0621323
R-HSA-1980143	Signaling by NOTCH1	0.13781	0.136809	0.123263
R-HSA-1980145	Signaling by NOTCH2	0.179448	0.169667	0.144525
R-HSA-2122948	Activated NOTCH1 Transmits Signal to the Nucleus	0.194293	0.196689	0.17181
R-HSA-2979096	NOTCH2 Activation and Transmission of Signal to the Nucleus	0.197512	0.201009	0.165672
R-HSA-9012852	Signaling by NOTCH3	0.176492	0.164249	0.151969
R-HSA-9013507	NOTCH3 Activation and Transmission of Signal to the Nucleus	0.191856	0.187093	0.180606
R-HSA-606279	Deposition of new CENPA-containing nucleosomes at the centromere	0.0909575	0.0999961	0.110018
R-HSA-73886	Chromosome Maintenance	0.110578	0.114546	0.119526
R-HSA-774815	Nucleosome assembly	0.0909575	0.0999961	0.110018
R-HSA-111885	Opioid Signalling	0.112369	0.107143	0.0986273
R-HSA-112040	G-protein mediated events	0.115086	0.105557	0.0967353
R-HSA-170670	Adenylate cyclase inhibitory pathway	0.0557245	0.0868355	0.0642128
R-HSA-2980736	Peptide hormone metabolism	0.082882	0.0892552	0.0764928
R-HSA-381771	Synthesis, secretion, and inactivation of Glucagon-like Peptide-1 (GLP-1)	0.0980073	0.0894084	0.0823465
R-HSA-392170	ADP signalling through P2Y purinoceptor 12	0.108087	0.122987	0.103098
R-HSA-392518	Signal amplification	0.1113	0.0973561	0.0999247
R-HSA-400508	Incretin synthesis, secretion, and inactivation	0.0961608	0.0875133	0.0817238
R-HSA-418555	G alpha (s) signalling events	0.10521	0.105705	0.0856501
R-HSA-977444	GABA B receptor activation	0.0764892	0.0932456	0.0680037
R-HSA-991365	Activation of GABAB receptors	0.0764892	0.0932456	0.0680037
R-HSA-5620922	BBSome-mediated cargo-targeting to cilium	0.103423	0.102537	0.0868336
R-HSA-1461957	Beta defensins	-0.00710482	0.0376421	0.0533626
R-HSA-1461973	Defensins	0.194453	0.194719	0.208567
R-HSA-6803157	Antimicrobial peptides	0.146552	0.16883	0.171408
R-HSA-390918	Peroxisomal lipid metabolism	-0.0128493	0.00762395	-0.0163723
R-HSA-9033241	Peroxisomal protein import	0.111669	0.122379	0.0993504
R-HSA-9609507	Protein localization	0.125161	0.128059	0.131269
R-HSA-1187000	Fertilization	0.0949952	0.0884963	0.096864
R-HSA-1300642	Sperm Motility And Taxes	-0.147404	-0.0972665	-0.0930944
R-HSA-198693	AKT phosphorylates targets in the nucleus	0.150316	0.131407	0.135284
R-HSA-9614085	FOXO-mediated transcription	0.126508	0.120392	0.105441
R-HSA-9614399	Regulation of localization of FOXO transcription factors	0.144987	0.128494	0.128048
R-HSA-9615017	FOXO-mediated transcription of oxidative stress, metabolic and neuronal genes	0.125853	0.124263	0.101391
R-HSA-211897	Cytochrome P450 - arranged by substrate type	0.0682267	0.0651922	0.071997
R-HSA-211945	Phase I - Functionalization of compounds	0.0528148	0.0617389	0.0600801
R-HSA-211976	Endogenous sterols	0.107849	0.0975818	0.0780406
R-HSA-211981	Xenobiotics	0.178217	0.128017	0.159148
R-HSA-8937144	Aryl hydrocarbon receptor signalling	0.0763564	0.0741985	0.0564376
R-HSA-8983711	OAS antiviral response	0.173697	0.136857	0.122018
R-HSA-9013424	RHOV GTPase cycle	0.104758	0.101797	0.0707698
R-HSA-193144	Estrogen biosynthesis	0.0835182	0.0936498	0.0652731
R-HSA-196071	Metabolism of steroid hormones	0.0760342	0.0860235	0.0721105
R-HSA-8957322	Metabolism of steroids	0.0966945	0.0924028	0.0836534
R-HSA-199992	trans-Golgi Network Vesicle Budding	0.132694	0.13109	0.129009
R-HSA-432720	Lysosome Vesicle Biogenesis	0.128059	0.129866	0.128814
R-HSA-75896	Plasmalogen biosynthesis	-0.00180105	-0.0605002	-0.0287951
R-HSA-8848584	Wax and plasmalogen biosynthesis	0.0813419	0.0310036	-0.0159118
R-HSA-9033500	TYSND1 cleaves peroxisomal proteins	-0.0137892	-0.0403484	-0.0111
R-HSA-141424	Amplification of signal from the kinetochores	0.0824045	0.0861009	0.101018
R-HSA-141444	Amplification of signal from unattached kinetochores via a MAD2 inhibitory signal	0.0824045	0.0861009	0.101018
R-HSA-69618	Mitotic Spindle Checkpoint	0.0841146	0.087092	0.103288
R-HSA-187037	Signaling by NTRK1 (TRKA)	0.132112	0.119005	0.110871
R-HSA-198725	Nuclear Events (kinase and transcription factor activation)	0.127104	0.112441	0.10981
R-HSA-6804757	Regulation of TP53 Degradation	0.124193	0.121893	0.113181
R-HSA-6806003	Regulation of TP53 Expression and Degradation	0.12472	0.121317	0.113633
R-HSA-9031628	NGF-stimulated transcription	0.123	0.110564	0.109825
R-HSA-15869	Metabolism of nucleotides	0.125043	0.125625	0.150719
R-HSA-73614	Pyrimidine salvage	0.138196	0.097044	0.18022
R-HSA-8956321	Nucleotide salvage	0.145669	0.106154	0.174379
R-HSA-373080	Class B/2 (Secretin family receptors)	0.083349	0.0713044	0.0816253
R-HSA-500792	GPCR ligand binding	0.121791	0.111816	0.124322
R-HSA-72187	mRNA 3'-end processing	0.16642	0.1663	0.151892
R-HSA-73856	RNA Polymerase II Transcription Termination	0.168977	0.17303	0.157574
R-HSA-77289	Mitochondrial Fatty Acid Beta-Oxidation	0.0843346	0.123479	0.111234
R-HSA-212165	Epigenetic regulation of gene expression	0.118634	0.120879	0.102056
R-HSA-5250913	Positive epigenetic regulation of rRNA expression	0.115142	0.117903	0.103018
R-HSA-5250924	B-WICH complex positively regulates rRNA expression	0.111423	0.113937	0.109679
R-HSA-5693565	Recruitment and ATM-mediated phosphorylation of repair and signaling proteins at DNA double strand breaks	0.104068	0.108363	0.0937491
R-HSA-5693606	DNA Double Strand Break Response	0.105876	0.110001	0.0935896
R-HSA-397014	Muscle contraction	0.107525	0.105907	0.0958636
R-HSA-5576891	Cardiac conduction	0.112236	0.101014	0.101283
R-HSA-5578775	Ion homeostasis	0.13385	0.121369	0.127663
R-HSA-936837	Ion transport by P-type ATPases	0.138681	0.125399	0.133062
R-HSA-447115	Interleukin-12 family signaling	0.162564	0.157497	0.159901
R-HSA-8950505	Gene and protein expression by JAK-STAT signaling after Interleukin-12 stimulation	0.191691	0.189068	0.186088
R-HSA-9020591	Interleukin-12 signaling	0.174833	0.170908	0.175292
R-HSA-1296071	Potassium Channels	0.0470556	0.0565286	0.0500197
R-HSA-1296346	Tandem pore domain potassium channels	0.0171389	0.0188267	0.0898774
R-HSA-1299308	Tandem of pore domain in a weak inwardly rectifying K+ channels (TWIK)	-0.128265	-0.111847	-0.0178409
R-HSA-5576886	Phase 4 - resting membrane potential	0.104335	0.0545086	0.0683625
R-HSA-451927	Interleukin-2 family signaling	0.137622	0.122511	0.105293
R-HSA-114516	Disinhibition of SNARE formation	0.117437	0.122662	0.105596
R-HSA-76005	Response to elevated platelet cytosolic Ca2+	0.154286	0.146722	0.152719
R-HSA-166662	Lectin pathway of complement activation	0.010208	-0.0617894	-0.0550628
R-HSA-2855086	Ficolins bind to repetitive carbohydrate structures on the target cell surface	0.11984	0.035312	0.0900296
R-HSA-114608	Platelet degranulation	0.157079	0.148845	0.155277
R-HSA-432722	Golgi Associated Vesicle Biogenesis	0.145517	0.146628	0.128242
R-HSA-156584	Cytosolic sulfonation of small molecules	0.027479	0.0173162	0.0306982
R-HSA-140534	Caspase activation via Death Receptors in the presence of ligand	0.0549561	0.0466347	0.0217644
R-HSA-2562578	TRIF-mediated programmed cell death	0.137855	0.11363	0.088192
R-HSA-5357769	Caspase activation via extrinsic apoptotic signalling pathway	0.0708512	0.0612856	0.041353
R-HSA-5686938	Regulation of TLR by endogenous ligand	0.18171	0.201264	0.202426
R-HSA-936964	Activation of IRF3/IRF7 mediated by TBK1/IKK epsilon	0.159251	0.151261	0.120057
R-HSA-937041	IKK complex recruitment mediated by RIP1	0.151457	0.14527	0.129659
R-HSA-937072	TRAF6-mediated induction of TAK1 complex within TLR4 complex	0.176191	0.17059	0.146065
R-HSA-9707616	Heme signaling	0.147886	0.127929	0.120257
R-HSA-975138	TRAF6 mediated induction of NFkB and MAP kinases upon TLR7/8 or 9 activation	0.156743	0.148538	0.145617
R-HSA-975163	IRAK2 mediated activation of TAK1 complex upon TLR7/8 or 9 stimulation	0.176191	0.17059	0.146065
R-HSA-1428517	The citric acid (TCA) cycle and respiratory electron transport	0.149755	0.155896	0.174286
R-HSA-163200	Respiratory electron transport, ATP synthesis by chemiosmotic coupling, and heat production by uncoupling proteins.	0.154522	0.164186	0.17881
R-HSA-611105	Respiratory electron transport	0.14554	0.153738	0.1678
R-HSA-6799198	Complex I biogenesis	0.117146	0.124663	0.142153
R-HSA-1630316	Glycosaminoglycan metabolism	0.0718257	0.0870128	0.0717082
R-HSA-2142845	Hyaluronan metabolism	0.15552	0.155141	0.194412
R-HSA-2142850	Hyaluronan biosynthesis and export	-0.140122	-0.264013	0.122599
R-HSA-3371378	Regulation by c-FLIP	0.0529699	0.046871	0.0193488
R-HSA-5213460	RIPK1-mediated regulated necrosis	0.110994	0.110159	0.0947706
R-HSA-5218900	CASP8 activity is inhibited	0.0529699	0.046871	0.0193488
R-HSA-5633008	TP53 Regulates Transcription of Cell Death Genes	0.0860854	0.0811104	0.0916013
R-HSA-5675482	Regulation of necroptotic cell death	0.110327	0.110464	0.0952054
R-HSA-6803211	TP53 Regulates Transcription of Death Receptors and Ligands	0.116736	0.117916	0.126996
R-HSA-69416	Dimerization of procaspase-8	0.0529699	0.046871	0.0193488
R-HSA-75158	TRAIL signaling	0.105929	0.103795	0.0743652
R-HSA-420499	Class C/3 (Metabotropic glutamate/pheromone receptors)	0.157822	0.135844	0.111402
R-HSA-373076	Class A/1 (Rhodopsin-like receptors)	0.128211	0.11832	0.129691
R-HSA-375276	Peptide ligand-binding receptors	0.136645	0.128262	0.13574
R-HSA-174084	Autodegradation of Cdh1 by Cdh1:APC/C	0.193294	0.186134	0.189158
R-HSA-187577	SCF(Skp2)-mediated degradation of p27/p21	0.153568	0.152011	0.149602
R-HSA-69202	Cyclin E associated events during G1/S transition	0.139556	0.142167	0.133817
R-HSA-69206	G1/S Transition	0.123912	0.130263	0.121359
R-HSA-69656	Cyclin A:Cdk2-associated events at S phase entry	0.137838	0.140561	0.132449
R-HSA-8878159	Transcriptional regulation by RUNX3	0.161615	0.149358	0.144587
R-HSA-8941858	Regulation of RUNX3 expression and activity	0.211605	0.197332	0.191271
R-HSA-9013694	Signaling by NOTCH4	0.164372	0.1531	0.139176
R-HSA-9604323	Negative regulation of NOTCH4 signaling	0.172234	0.163778	0.157714
R-HSA-532668	N-glycan trimming in the ER and Calnexin/Calreticulin cycle	0.163198	0.151521	0.147835
R-HSA-901032	ER Quality Control Compartment (ERQC)	0.208572	0.206411	0.172988
R-HSA-901042	Calnexin/calreticulin cycle	0.177806	0.171476	0.16115
R-HSA-201451	Signaling by BMP	0.166372	0.129304	0.126185
R-HSA-1500931	Cell-Cell communication	0.107953	0.101105	0.100441
R-HSA-391160	Signal regulatory protein family interactions	0.0791281	0.0607237	0.0386919
R-HSA-3299685	Detoxification of Reactive Oxygen Species	0.127656	0.1351	0.129125
R-HSA-6803544	Ion influx/efflux at host-pathogen interface	0.0606525	0.0568505	0.00596079
R-HSA-456926	Thrombin signalling through proteinase activated receptors (PARs)	0.126598	0.124127	0.111837
R-HSA-201722	Formation of the beta-catenin:TCF transactivating complex	0.115719	0.120153	0.103879
R-HSA-2173793	Transcriptional activity of SMAD2/SMAD3:SMAD4 heterotrimer	0.139787	0.134974	0.116839
R-HSA-2173796	SMAD2/SMAD3:SMAD4 heterotrimer regulates transcription	0.141431	0.1373	0.118233
R-HSA-3769402	Deactivation of the beta-catenin transactivating complex	0.151109	0.141279	0.120107
R-HSA-381426	Regulation of Insulin-like Growth Factor (IGF) transport and uptake by Insulin-like Growth Factor Binding Proteins (IGFBPs)	0.120323	0.115195	0.120832
R-HSA-8957275	Post-translational protein phosphorylation	0.123562	0.118893	0.123467
R-HSA-2559580	Oxidative Stress Induced Senescence	0.154628	0.150125	0.136495
R-HSA-3899300	SUMOylation of transcription cofactors	0.117264	0.115116	0.0873343
R-HSA-4655427	SUMOylation of DNA methylation proteins	0.0968789	0.0951316	0.0788915
R-HSA-8939243	RUNX1 interacts with co-factors whose precise effect on RUNX1 targets is not known	0.164899	0.155374	0.144421
R-HSA-8943724	Regulation of PTEN gene transcription	0.136532	0.132971	0.123684
R-HSA-9609523	Insertion of tail-anchored proteins into the endoplasmic reticulum membrane	0.143812	0.140169	0.146315
R-HSA-113418	Formation of the Early Elongation Complex	0.134569	0.138479	0.136944
R-HSA-6807505	RNA polymerase II transcribes snRNA genes	0.117665	0.110127	0.0986017
R-HSA-72086	mRNA Capping	0.140644	0.142847	0.141468
R-HSA-77075	RNA Pol II CTD phosphorylation and interaction with CE	0.119514	0.118998	0.126847
R-HSA-6804756	Regulation of TP53 Activity through Phosphorylation	0.100309	0.103153	0.0993461
R-HSA-73776	RNA Polymerase II Promoter Escape	0.111358	0.107041	0.107969
R-HSA-73779	RNA Polymerase II Transcription Pre-Initiation And Promoter Opening	0.111358	0.107041	0.107969
R-HSA-75953	RNA Polymerase II Transcription Initiation	0.111358	0.107041	0.107969
R-HSA-76042	RNA Polymerase II Transcription Initiation And Promoter Clearance	0.111358	0.107041	0.107969
R-HSA-444209	Free fatty acid receptors	0.100808	0.130769	0.121301
R-HSA-140342	Apoptosis induced DNA fragmentation	0.152101	0.163371	0.149298
R-HSA-75153	Apoptotic execution phase	0.104906	0.102359	0.099561
R-HSA-1181150	Signaling by NODAL	0.139454	0.0946167	0.0950827
R-HSA-1433617	Regulation of signaling by NODAL	-0.00699669	-0.106807	-0.0826048
R-HSA-5669034	TNFs bind their physiological receptors	0.122637	0.0969725	0.0836049
R-HSA-156827	L13a-mediated translational silencing of Ceruloplasmin expression	0.30858	0.307816	0.291704
R-HSA-72613	Eukaryotic Translation Initiation	0.300852	0.296199	0.282359
R-HSA-72649	Translation initiation complex formation	0.274749	0.27195	0.254804
R-HSA-72662	Activation of the mRNA upon binding of the cap-binding complex and eIFs, and subsequent binding to 43S	0.270863	0.264407	0.248956
R-HSA-72689	Formation of a pool of free 40S subunits	0.331796	0.329551	0.315462
R-HSA-72695	Formation of the ternary complex, and subsequently, the 43S complex	0.295375	0.289394	0.27647
R-HSA-72702	Ribosomal scanning and start codon recognition	0.274936	0.26961	0.26021
R-HSA-72706	GTP hydrolysis and joining of the 60S ribosomal subunit	0.3121	0.309594	0.298806
R-HSA-72737	Cap-dependent Translation Initiation	0.300852	0.296199	0.282359
R-HSA-72766	Translation	0.215329	0.219622	0.221587
R-HSA-112308	Presynaptic depolarization and calcium channel opening	-0.168565	-0.14109	-0.155397
R-HSA-9013420	RHOU GTPase cycle	0.0962437	0.0966819	0.0733024
R-HSA-176187	Activation of ATR in response to replication stress	0.0366153	0.06302	0.0798181
R-HSA-68962	Activation of the pre-replicative complex	-0.00367709	0.0262344	0.0435665
R-HSA-8953750	Transcriptional Regulation by E2F6	0.0831733	0.0836569	0.0705679
R-HSA-1368108	BMAL1:CLOCK,NPAS2 activates circadian gene expression	0.12746	0.113892	0.0963359
R-HSA-400253	Circadian Clock	0.135606	0.130593	0.110814
R-HSA-1483255	PI Metabolism	0.0774574	0.0587108	0.0365406
R-HSA-1483257	Phospholipid metabolism	0.0877117	0.0785243	0.0665392
R-HSA-1660499	Synthesis of PIPs at the plasma membrane	0.0754069	0.0537008	0.0229124
R-HSA-199418	Negative regulation of the PI3K/AKT network	0.161162	0.151039	0.145625
R-HSA-512988	Interleukin-3, Interleukin-5 and GM-CSF signaling	0.147124	0.129535	0.113744
R-HSA-6811558	PI5P, PP2A and IER3 Regulate PI3K/AKT Signaling	0.170722	0.159116	0.156025
R-HSA-8853659	RET signaling	0.129057	0.111029	0.105895
R-HSA-9006335	Signaling by Erythropoietin	0.117291	0.0971953	0.0812109
R-HSA-9027276	Erythropoietin activates Phosphoinositide-3-kinase (PI3K)	0.115677	0.104724	0.0804399
R-HSA-912526	Interleukin receptor SHC signaling	0.127551	0.109815	0.0953765
R-HSA-912631	Regulation of signaling by CBL	0.145777	0.124522	0.108323
R-HSA-204174	Regulation of pyruvate dehydrogenase (PDH) complex	0.0799323	0.082521	0.074708
R-HSA-5362517	Signaling by Retinoic Acid	0.0880735	0.0853141	0.0993102
R-HSA-70268	Pyruvate metabolism	0.170153	0.168411	0.176097
R-HSA-71406	Pyruvate metabolism and Citric Acid (TCA) cycle	0.14602	0.144968	0.168569
R-HSA-425397	Transport of vitamins, nucleosides, and related molecules	0.0910514	0.0885618	0.120415
R-HSA-83936	Transport of nucleosides and free purine and pyrimidine bases across the plasma membrane	0.143241	0.129059	0.126406
R-HSA-112310	Neurotransmitter release cycle	0.0663277	0.072104	0.0652958
R-HSA-210500	Glutamate Neurotransmitter Release Cycle	0.0665184	0.0740253	0.0607789
R-HSA-425393	Transport of inorganic cations/anions and amino acids/oligopeptides	0.0510181	0.0515584	0.0464415
R-HSA-417957	P2Y receptors	0.140576	0.141912	0.160223
R-HSA-418038	Nucleotide-like (purinergic) receptors	0.0927319	0.0678922	0.115854
R-HSA-202131	Metabolism of nitric oxide: NOS3 activation and regulation	0.137834	0.131879	0.107331
R-HSA-203641	NOSTRIN mediated eNOS trafficking	0.141209	0.144109	0.102756
R-HSA-2682334	EPH-Ephrin signaling	0.129508	0.14238	0.1167
R-HSA-373752	Netrin-1 signaling	0.117555	0.104717	0.0883819
R-HSA-373753	Nephrin family interactions	0.116706	0.101316	0.0874035
R-HSA-3928662	EPHB-mediated forward signaling	0.142817	0.146741	0.115625
R-HSA-418885	DCC mediated attractive signaling	0.153282	0.145481	0.110402
R-HSA-392154	Nitric oxide stimulates guanylate cyclase	0.0178526	0.0476874	-0.0133932
R-HSA-418346	Platelet homeostasis	0.0961899	0.096045	0.0662742
R-HSA-418457	cGMP effects	-0.0429935	0.00130252	-0.093124
R-HSA-1592230	Mitochondrial biogenesis	0.132521	0.130484	0.113975
R-HSA-163282	Mitochondrial transcription initiation	0.205496	0.220327	0.266455
R-HSA-2151201	Transcriptional activation of mitochondrial biogenesis	0.143174	0.135378	0.112505
R-HSA-75944	Transcription from mitochondrial promoters	0.162011	0.180267	0.218477
R-HSA-165159	MTOR signalling	0.140601	0.129508	0.104259
R-HSA-166208	mTORC1-mediated signalling	0.162572	0.143001	0.125248
R-HSA-380108	Chemokine receptors bind chemokines	0.130312	0.0942246	0.12792
R-HSA-3214815	HDACs deacetylate histones	0.114821	0.115956	0.0952444
R-HSA-427413	NoRC negatively regulates rRNA expression	0.114602	0.123776	0.106044
R-HSA-5250941	Negative epigenetic regulation of rRNA expression	0.108756	0.11762	0.098601
R-HSA-428359	Insulin-like Growth Factor-2 mRNA Binding Proteins (IGF2BPs/IMPs/VICKZs) bind RNA	0.248842	0.230139	0.250747
R-HSA-1660514	Synthesis of PIPs at the Golgi membrane	0.142153	0.129575	0.11772
R-HSA-1660516	Synthesis of PIPs at the early endosome membrane	0.0412867	0.0284886	0.0245
R-HSA-1660517	Synthesis of PIPs at the late endosome membrane	0.0272292	0.0276422	0.0123663
R-HSA-163685	Integration of energy metabolism	0.11043	0.106064	0.0923175
R-HSA-422356	Regulation of insulin secretion	0.115032	0.104377	0.0972595
R-HSA-109704	PI3K Cascade	0.0750792	0.059048	0.0494812
R-HSA-112399	IRS-mediated signalling	0.0842768	0.0696022	0.057533
R-HSA-114604	GPVI-mediated activation cascade	0.133931	0.125539	0.115897
R-HSA-1266695	Interleukin-7 signaling	0.144632	0.130501	0.118073
R-HSA-1433557	Signaling by SCF-KIT	0.115868	0.0997448	0.0876812
R-HSA-186763	Downstream signal transduction	0.115039	0.0986793	0.0796279
R-HSA-198203	PI3K/AKT activation	0.165457	0.141644	0.127848
R-HSA-201556	Signaling by ALK	0.138619	0.130783	0.11967
R-HSA-210993	Tie2 Signaling	0.129679	0.108978	0.0875301
R-HSA-2404192	Signaling by Type 1 Insulin-like Growth Factor 1 Receptor (IGF1R)	0.0917094	0.0790935	0.063514
R-HSA-2424491	DAP12 signaling	0.087779	0.0780312	0.0748068
R-HSA-2428924	IGF1R signaling cascade	0.0917094	0.0790935	0.063514
R-HSA-2428928	IRS-related events triggered by IGF1R	0.0902571	0.0778922	0.0618588
R-HSA-389356	CD28 co-stimulation	0.120872	0.116421	0.0952383
R-HSA-389357	CD28 dependent PI3K/Akt signaling	0.14805	0.131476	0.123631
R-HSA-74751	Insulin receptor signalling cascade	0.0864557	0.0739017	0.060435
R-HSA-74752	Signaling by Insulin receptor	0.0923695	0.085905	0.0722592
R-HSA-9696264	RND3 GTPase cycle	0.147264	0.142831	0.126103
R-HSA-9696273	RND1 GTPase cycle	0.114539	0.101875	0.0884499
R-HSA-6811438	Intra-Golgi traffic	0.0996238	0.105186	0.0856111
R-HSA-8853383	Lysosomal oligosaccharide catabolism	0.0190645	-0.0440803	0.0454078
R-HSA-1638091	Heparan sulfate/heparin (HS-GAG) metabolism	0.0809616	0.0947303	0.0504425
R-HSA-1793185	Chondroitin sulfate/dermatan sulfate metabolism	0.080366	0.0917473	0.0489836
R-HSA-196854	Metabolism of vitamins and cofactors	0.0825576	0.0849911	0.0880597
R-HSA-1971475	A tetrasaccharide linker sequence is required for GAG synthesis	0.109419	0.115976	0.0869395
R-HSA-2022928	HS-GAG biosynthesis	0.0682261	0.0758716	0.0411186
R-HSA-2024096	HS-GAG degradation	0.0954733	0.137445	0.0635734
R-HSA-2187338	Visual phototransduction	0.0913759	0.104397	0.0983878
R-HSA-3000171	Non-integrin membrane-ECM interactions	0.161202	0.14215	0.15298
R-HSA-6806667	Metabolism of fat-soluble vitamins	0.0862515	0.100232	0.107031
R-HSA-975634	Retinoid metabolism and transport	0.115302	0.125469	0.119911
R-HSA-5617472	Activation of anterior HOX genes in hindbrain development during early embryogenesis	0.107149	0.103818	0.0828754
R-HSA-5619507	Activation of HOX genes during differentiation	0.107149	0.103818	0.0828754
R-HSA-264876	Insulin processing	0.0656394	0.073588	0.0659231
R-HSA-5620916	VxPx cargo-targeting to cilium	0.0620145	0.0789721	0.0551649
R-HSA-8851680	Butyrophilin (BTN) family interactions	0.0150422	0.0220485	0.0388513
R-HSA-186712	Regulation of beta-cell development	0.11065	0.105901	0.0826504
R-HSA-210747	Regulation of gene expression in early pancreatic precursor cells	0.114741	0.114322	0.12422
R-HSA-383280	Nuclear Receptor transcription pathway	0.212004	0.211527	0.195961
R-HSA-4090294	SUMOylation of intracellular receptors	0.181974	0.182678	0.165927
R-HSA-5628897	TP53 Regulates Metabolic Genes	0.148041	0.14534	0.135562
R-HSA-5689901	Metalloprotease DUBs	0.158401	0.146976	0.143846
R-HSA-420029	Tight junction interactions	0.080854	0.11441	0.0905878
R-HSA-421270	Cell-cell junction organization	0.10617	0.110574	0.120475
R-HSA-446728	Cell junction organization	0.127706	0.121894	0.127961
R-HSA-8935964	RUNX1 regulates expression of components of tight junctions	0.132617	0.155472	0.134953
R-HSA-2142753	Arachidonic acid metabolism	0.0887193	0.0629048	0.0938005
R-HSA-447041	CHL1 interactions	0.189323	0.148938	0.154288
R-HSA-6791226	Major pathway of rRNA processing in the nucleolus and cytosol	0.167438	0.170793	0.153089
R-HSA-72312	rRNA processing	0.162943	0.166234	0.150869
R-HSA-8868773	rRNA processing in the nucleus and cytosol	0.165873	0.169687	0.152434
R-HSA-9022702	MECP2 regulates transcription of neuronal ligands	0.140047	0.13312	0.0991294
R-HSA-3928664	Ephrin signaling	0.112783	0.119681	0.0985189
R-HSA-447043	Neurofascin interactions	0.121629	0.135587	0.126596
R-HSA-1483206	Glycerophospholipid biosynthesis	0.105068	0.105194	0.103874
R-HSA-1483226	Synthesis of PI	0.13117	0.154204	0.114227
R-HSA-6790901	rRNA modification in the nucleus and cytosol	0.1184	0.134181	0.123316
R-HSA-390471	Association of TriC/CCT with target proteins during biosynthesis	0.123723	0.126492	0.1257
R-HSA-1912420	Pre-NOTCH Processing in Golgi	0.198686	0.177117	0.141552
R-HSA-1912422	Pre-NOTCH Expression and Processing	0.139751	0.138354	0.127671
R-HSA-9603798	Class I peroxisomal membrane protein import	0.0291821	0.0442474	0.0813864
R-HSA-8935690	Digestion	0.0365817	0.0705898	0.0891373
R-HSA-8963743	Digestion and absorption	0.0800801	0.13002	0.102245
R-HSA-6783783	Interleukin-10 signaling	0.0957669	0.0611524	0.0923416
R-HSA-525793	Myogenesis	0.123438	0.112941	0.113387
R-HSA-877300	Interferon gamma signaling	0.175283	0.164424	0.163606
R-HSA-73980	RNA Polymerase III Transcription Termination	0.0850695	0.0964944	0.0855938
R-HSA-1912408	Pre-NOTCH Transcription and Translation	0.137319	0.13733	0.128929
R-HSA-2559585	Oncogene Induced Senescence	0.157932	0.158185	0.139848
R-HSA-68689	CDC6 association with the ORC:origin complex	-0.00503839	0.00516542	0.0587389
R-HSA-68911	G2 Phase	0.0594341	0.0639859	0.108619
R-HSA-69231	Cyclin D associated events in G1	0.108406	0.111746	0.0926113
R-HSA-69236	G1 Phase	0.108406	0.111746	0.0926113
R-HSA-157579	Telomere Maintenance	0.107867	0.116853	0.117988
R-HSA-171319	Telomere Extension By Telomerase	0.124024	0.128541	0.141938
R-HSA-180786	Extension of Telomeres	0.10526	0.116088	0.124003
R-HSA-204005	COPII-mediated vesicle transport	0.0611779	0.0651741	0.050696
R-HSA-3238698	WNT ligand biogenesis and trafficking	0.147457	0.114059	0.109668
R-HSA-499943	Interconversion of nucleotide di- and triphosphates	0.169512	0.17654	0.185368
R-HSA-70263	Gluconeogenesis	0.119623	0.125272	0.155759
R-HSA-141405	Inhibition of the proteolytic activity of APC/C required for the onset of anaphase by mitotic spindle checkpoint components	0.0506273	0.0532296	0.104197
R-HSA-141430	Inactivation of APC/C via direct inhibition of the APC/C complex	0.0506273	0.0532296	0.104197
R-HSA-174048	APC/C:Cdc20 mediated degradation of Cyclin B	0.145213	0.148406	0.150792
R-HSA-176407	Conversion from APC/C:Cdc20 to APC/C:Cdh1 in late anaphase	0.0398837	0.0449695	0.0945233
R-HSA-176412	Phosphorylation of the APC/C	0.0575926	0.0611903	0.109554
R-HSA-179409	APC-Cdc20 mediated degradation of Nek2A	0.147098	0.150173	0.144302
R-HSA-2559582	Senescence-Associated Secretory Phenotype (SASP)	0.139993	0.130786	0.129521
R-HSA-8853884	Transcriptional Regulation by VENTX	0.131704	0.118868	0.132711
R-HSA-163765	ChREBP activates metabolic gene expression	0.0981721	0.116568	0.13954
R-HSA-1655829	Regulation of cholesterol biosynthesis by SREBP (SREBF)	0.114892	0.0959938	0.0857278
R-HSA-196780	Biotin transport and metabolism	-0.00640335	0.0236312	0.0391219
R-HSA-196849	Metabolism of water-soluble vitamins and cofactors	0.0501702	0.0520702	0.0626561
R-HSA-200425	Carnitine metabolism	0.0686531	0.0761765	0.0453635
R-HSA-2426168	Activation of gene expression by SREBF (SREBP)	0.118466	0.0978787	0.0975343
R-HSA-964975	Vitamins B6 activation to pyridoxal phosphate	0.0395369	0.0723535	0.0660622
R-HSA-9024446	NR1H2 and NR1H3-mediated signaling	0.106309	0.101005	0.0917497
R-HSA-9029558	NR1H2 & NR1H3 regulate gene expression linked to lipogenesis	0.116034	0.113641	0.0866247
R-HSA-6794361	Neurexins and neuroligins	0.0709512	0.0710891	0.0502192
R-HSA-6794362	Protein-protein interactions at synapses	0.0787529	0.0779653	0.0570068
R-HSA-1433559	Regulation of KIT signaling	0.1376	0.121374	0.108554
R-HSA-1660661	Sphingolipid de novo biosynthesis	0.108248	0.110783	0.10516
R-HSA-3214858	RMTs methylate histone arginines	0.113133	0.117341	0.0916971
R-HSA-9607240	FLT3 Signaling	0.132383	0.119583	0.104303
R-HSA-9706369	Negative regulation of FLT3	0.202208	0.182778	0.147752
R-HSA-982772	Growth hormone receptor signaling	0.1373	0.118434	0.105518
R-HSA-1227986	Signaling by ERBB2	0.15667	0.14713	0.140761
R-HSA-1236394	Signaling by ERBB4	0.170036	0.164943	0.159769
R-HSA-1250196	SHC1 events in ERBB2 signaling	0.155368	0.144476	0.148288
R-HSA-1250342	PI3K events in ERBB4 signaling	0.0885061	0.0376356	0.0424915
R-HSA-1250347	SHC1 events in ERBB4 signaling	0.144783	0.126297	0.103796
R-HSA-1251985	Nuclear signaling by ERBB4	0.165788	0.162226	0.158769
R-HSA-1306955	GRB7 events in ERBB2 signaling	0.168156	0.157085	0.162909
R-HSA-1358803	Downregulation of ERBB2:ERBB3 signaling	0.17652	0.176514	0.149968
R-HSA-1963640	GRB2 events in ERBB2 signaling	0.171792	0.157305	0.160684
R-HSA-1963642	PI3K events in ERBB2 signaling	0.170326	0.150671	0.160764
R-HSA-6785631	ERBB2 Regulates Cell Motility	0.176282	0.164132	0.167814
R-HSA-8847993	ERBB2 Activates PTK6 Signaling	0.175688	0.160727	0.169253
R-HSA-8848021	Signaling by PTK6	0.171712	0.163375	0.154346
R-HSA-8863795	Downregulation of ERBB2 signaling	0.166082	0.155079	0.148902
R-HSA-9006927	Signaling by Non-Receptor Tyrosine Kinases	0.171712	0.163375	0.154346
R-HSA-432030	Transport of glycerol from adipocytes to the liver by Aquaporins	-0.0774406	-0.0123323	0.0668526
R-HSA-432047	Passive transport by Aquaporins	0.0969647	0.0976098	0.0914547
R-HSA-445717	Aquaporin-mediated transport	0.121017	0.124184	0.11147
R-HSA-71403	Citric acid cycle (TCA cycle)	0.132187	0.12515	0.195821
R-HSA-8856825	Cargo recognition for clathrin-mediated endocytosis	0.159484	0.157674	0.154933
R-HSA-373755	Semaphorin interactions	0.130814	0.125291	0.116424
R-HSA-399956	CRMPs in Sema3A signaling	0.141083	0.135159	0.145398
R-HSA-1059683	Interleukin-6 signaling	0.140223	0.105012	0.1016
R-HSA-2586552	Signaling by Leptin	0.139001	0.113911	0.107523
R-HSA-6783589	Interleukin-6 family signaling	0.132826	0.101889	0.102322
R-HSA-877312	Regulation of IFNG signaling	0.106856	0.082675	0.0721718
R-HSA-8849474	PTK6 Activates STAT3	0.141195	0.122273	0.113747
R-HSA-8939242	RUNX1 regulates transcription of genes involved in differentiation of keratinocytes	0.123246	0.0857885	0.090112
R-HSA-909733	Interferon alpha/beta signaling	0.152865	0.112196	0.117926
R-HSA-912694	Regulation of IFNA signaling	0.105495	0.0651816	0.0688781
R-HSA-9674555	Signaling by CSF3 (G-CSF)	0.152991	0.145813	0.123418
R-HSA-9705462	Inactivation of CSF3 (G-CSF) signaling	0.169948	0.157537	0.141396
R-HSA-5625900	RHO GTPases activate CIT	0.136248	0.156078	0.135905
R-HSA-2022870	Chondroitin sulfate biosynthesis	0.092153	0.0827966	0.0372913
R-HSA-2022923	Dermatan sulfate biosynthesis	0.0958534	0.0781045	0.0924276
R-HSA-2024101	CS/DS degradation	0.137025	0.122606	0.0872716
R-HSA-381038	XBP1(S) activates chaperone genes	0.0976078	0.0957716	0.0944721
R-HSA-381070	IRE1alpha activates chaperones	0.0996823	0.098528	0.0975222
R-HSA-3214842	HDMs demethylate histones	0.0802298	0.0852453	0.0540611
R-HSA-1296041	Activation of G protein gated Potassium channels	0.0793194	0.0920463	0.0687492
R-HSA-1296059	G protein gated Potassium channels	0.0793194	0.0920463	0.0687492
R-HSA-1296065	Inwardly rectifying K+ channels	0.0745927	0.0870283	0.0639934
R-HSA-202040	G-protein activation	0.0894737	0.090973	0.0852452
R-HSA-381676	Glucagon-like Peptide-1 (GLP1) regulates insulin secretion	0.164713	0.142147	0.141321
R-HSA-392451	G beta:gamma signalling through PI3Kgamma	0.134161	0.132933	0.113881
R-HSA-392851	Prostacyclin signalling through prostacyclin receptor	0.102446	0.118319	0.0951789
R-HSA-397795	G-protein beta:gamma signalling	0.133697	0.132234	0.107598
R-HSA-400042	Adrenaline,noradrenaline inhibits insulin secretion	0.0879031	0.09962	0.0806903
R-HSA-4086398	Ca2+ pathway	0.148115	0.137273	0.132488
R-HSA-418217	G beta:gamma signalling through PLC beta	0.0859563	0.102034	0.0795846
R-HSA-418592	ADP signalling through P2Y purinoceptor 1	0.0857356	0.0786708	0.0759363
R-HSA-420092	Glucagon-type ligand receptors	0.103306	0.110525	0.0865317
R-HSA-428930	Thromboxane signalling through TP receptor	0.0959399	0.094202	0.0865511
R-HSA-432040	Vasopressin regulates renal water homeostasis via Aquaporins	0.122167	0.120201	0.114704
R-HSA-451326	Activation of kainate receptors upon glutamate binding	0.091476	0.099022	0.0864099
R-HSA-500657	Presynaptic function of Kainate receptors	0.0859563	0.102034	0.0795846
R-HSA-6814122	Cooperation of PDCL (PhLP1) and TRiC/CCT in G-protein beta folding	0.123516	0.126039	0.115531
R-HSA-8964315	G beta:gamma signalling through BTK	0.106921	0.116502	0.0896044
R-HSA-8964616	G beta:gamma signalling through CDC42	0.102105	0.116086	0.0862478
R-HSA-997272	Inhibition of voltage gated Ca2+ channels via Gbeta/gamma subunits	0.0793194	0.0920463	0.0687492
R-HSA-199220	Vitamin B5 (pantothenate) metabolism	0.0688103	0.0366145	0.063407
R-HSA-201688	WNT mediated activation of DVL	0.101282	0.0966304	0.0865883
R-HSA-4641262	Disassembly of the destruction complex and recruitment of AXIN to the membrane	0.119789	0.107872	0.0972359
R-HSA-5368598	Negative regulation of TCF-dependent signaling by DVL-interacting proteins	0.0972309	0.102138	0.0885076
R-HSA-2028269	Signaling by Hippo	0.114117	0.108777	0.090215
R-HSA-5099900	WNT5A-dependent internalization of FZD4	0.139925	0.143689	0.135311
R-HSA-1299316	TWIK-releated acid-sensitive K+ channel (TASK)	0.481626	0.485687	0.476145
R-HSA-5694530	Cargo concentration in the ER	0.0903605	0.0956143	0.0750676
R-HSA-6811440	Retrograde transport at the Trans-Golgi-Network	0.111889	0.103668	0.114683
R-HSA-177929	Signaling by EGFR	0.128198	0.129432	0.116893
R-HSA-3928665	EPH-ephrin mediated repulsion of cells	0.136997	0.150883	0.126098
R-HSA-9013700	NOTCH4 Activation and Transmission of Signal to the Nucleus	0.171765	0.163384	0.150796
R-HSA-196741	Cobalamin (Cbl, vitamin B12) transport and metabolism	0.0704512	0.0947344	0.0914825
R-HSA-2162123	Synthesis of Prostaglandins (PG) and Thromboxanes (TX)	0.0941086	0.0787324	0.0759471
R-HSA-3214841	PKMTs methylate histone lysines	0.126774	0.125269	0.0953164
R-HSA-8936459	RUNX1 regulates genes involved in megakaryocyte differentiation and platelet function	0.116584	0.114975	0.0902808
R-HSA-419771	Opsins	-0.0409234	-0.0668013	0.0392972
R-HSA-109606	Intrinsic Pathway for Apoptosis	0.127116	0.118993	0.116878
R-HSA-111458	Formation of apoptosome	0.112098	0.111282	0.0993903
R-HSA-111459	Activation of caspases through apoptosome-mediated cleavage	0.1303	0.147895	0.102601
R-HSA-111461	Cytochrome c-mediated apoptotic response	0.119522	0.124313	0.104989
R-HSA-111463	SMAC (DIABLO) binds to IAPs	0.138497	0.154005	0.124212
R-HSA-111464	SMAC(DIABLO)-mediated dissociation of IAP:caspase complexes	0.138497	0.154005	0.124212
R-HSA-111469	SMAC, XIAP-regulated apoptotic response	0.134866	0.150557	0.121109
R-HSA-111471	Apoptotic factor-mediated response	0.127076	0.132615	0.11534
R-HSA-6803207	TP53 Regulates Transcription of Caspase Activators and Caspases	0.0774596	0.0768569	0.0852649
R-HSA-9627069	Regulation of the apoptosome activity	0.112098	0.111282	0.0993903
R-HSA-1483249	Inositol phosphate metabolism	0.060073	0.0543439	0.0147158
R-HSA-1855183	Synthesis of IP2, IP, and Ins in the cytosol	0.00525244	0.0194891	-0.0178665
R-HSA-168142	Toll Like Receptor 10 (TLR10) Cascade	0.156203	0.148802	0.145711
R-HSA-168176	Toll Like Receptor 5 (TLR5) Cascade	0.156203	0.148802	0.145711
R-HSA-448424	Interleukin-17 signaling	0.150684	0.140549	0.125096
R-HSA-450294	MAP kinase activation	0.151553	0.141434	0.125962
R-HSA-450321	JNK (c-Jun kinases) phosphorylation and activation mediated by activated human TAK1	0.164337	0.164872	0.140398
R-HSA-975871	MyD88 cascade initiated on plasma membrane	0.156203	0.148802	0.145711
R-HSA-192105	Synthesis of bile acids and bile salts	0.111225	0.113662	0.108865
R-HSA-193368	Synthesis of bile acids and bile salts via 7alpha-hydroxycholesterol	0.11152	0.107653	0.112292
R-HSA-194068	Bile acid and bile salt metabolism	0.116199	0.120741	0.114626
R-HSA-2046104	alpha-linolenic (omega3) and linoleic (omega6) acid metabolism	0.114909	0.0730186	0.106653
R-HSA-2046106	alpha-linolenic acid (ALA) metabolism	0.114909	0.0730186	0.106653
R-HSA-389887	Beta-oxidation of pristanoyl-CoA	-0.0475754	-0.0383334	-0.0170037
R-HSA-390247	Beta-oxidation of very long chain fatty acids	0.00221787	0.032417	-0.00106994
R-HSA-6804760	Regulation of TP53 Activity through Methylation	0.146309	0.141974	0.129714
R-HSA-2453902	The canonical retinoid cycle in rods (twilight vision)	0.033169	0.0527286	0.0494904
R-HSA-5693579	Homologous DNA Pairing and Strand Exchange	0.0591858	0.0671122	0.0710511
R-HSA-5693607	Processing of DNA double-strand break ends	0.0890323	0.099126	0.0872723
R-HSA-5693616	Presynaptic phase of homologous DNA pairing and strand exchange	0.0565726	0.0656131	0.0691506
R-HSA-69473	G2/M DNA damage checkpoint	0.0930092	0.0971761	0.0936498
R-HSA-75035	Chk1/Chk2(Cds1) mediated inactivation of Cyclin B:Cdk1 complex	0.119016	0.110659	0.118212
R-HSA-2514856	The phototransduction cascade	0.0915461	0.103952	0.0950398
R-HSA-2514859	Inactivation, recovery and regulation of the phototransduction cascade	0.0942271	0.100646	0.0981801
R-HSA-194306	Neurophilin interactions with VEGF and VEGFR	0.228855	0.153384	0.176588
R-HSA-399954	Sema3A PAK dependent Axon repulsion	0.113576	0.115177	0.084919
R-HSA-399955	SEMA3A-Plexin repulsion signaling by inhibiting Integrin adhesion	0.151507	0.138779	0.119631
R-HSA-445144	Signal transduction by L1	0.171122	0.154064	0.150267
R-HSA-5676594	TNF receptor superfamily (TNFSF) members mediating non-canonical NF-kB pathway	0.0807832	0.0775468	0.0637616
R-HSA-9617828	FOXO-mediated transcription of cell cycle genes	0.138297	0.124588	0.127327
R-HSA-181429	Serotonin Neurotransmitter Release Cycle	0.0548358	0.0686415	0.0494368
R-HSA-181430	Norepinephrine Neurotransmitter Release Cycle	0.0567437	0.071469	0.0506084
R-HSA-212676	Dopamine Neurotransmitter Release Cycle	0.0456081	0.0618025	0.0394289
R-HSA-264642	Acetylcholine Neurotransmitter Release Cycle	0.0625204	0.0723431	0.0621512
R-HSA-1834949	Cytosolic sensors of pathogen-associated DNA	0.138637	0.126461	0.115729
R-HSA-73780	RNA Polymerase III Chain Elongation	0.0730639	0.0845144	0.0797652
R-HSA-375280	Amine ligand-binding receptors	0.130408	0.0950608	0.0883779
R-HSA-5673000	RAF activation	0.162031	0.153754	0.136391
R-HSA-888590	GABA synthesis, release, reuptake and degradation	0.0792373	0.0809754	0.0797539
R-HSA-442742	CREB1 phosphorylation through NMDA receptor-mediated activation of RAS signaling	0.0993437	0.0885592	0.0829573
R-HSA-442982	Ras activation upon Ca2+ influx through NMDA receptor	0.087141	0.0866034	0.0788251
R-HSA-389599	Alpha-oxidation of phytanate	-0.0695249	-0.0864137	-0.0629689
R-HSA-400451	Free fatty acids regulate insulin secretion	0.0853615	0.101711	0.0392363
R-HSA-400511	Synthesis, secretion, and inactivation of Glucose-dependent Insulinotropic Polypeptide (GIP)	0.0583443	0.0720127	0.0536192
R-HSA-434316	Fatty Acids bound to GPR40 (FFAR1) regulate insulin secretion	0.055444	-0.0023379	0.0118772
R-HSA-168643	Nucleotide-binding domain, leucine rich repeat containing receptor (NLR) signaling pathways	0.139371	0.131539	0.127333
R-HSA-622312	Inflammasomes	0.149643	0.138436	0.1433
R-HSA-844615	The AIM2 inflammasome	-0.0248977	-0.0968398	0.00355686
R-HSA-9708530	Regulation of BACH1 activity	0.141806	0.151998	0.12918
R-HSA-70895	Branched-chain amino acid catabolism	0.135144	0.118192	0.130319
R-HSA-3772470	Negative regulation of TCF-dependent signaling by WNT ligand antagonists	-0.0355499	-0.0404167	-0.0435764
R-HSA-5666185	RHO GTPases Activate Rhotekin and Rhophilins	0.136935	0.182201	0.136011
R-HSA-1606322	ZBP1(DAI) mediated induction of type I IFNs	0.159664	0.141245	0.133138
R-HSA-168638	NOD1/2 Signaling Pathway	0.130435	0.126684	0.112979
R-HSA-168927	TICAM1, RIP1-mediated IKK complex recruitment	0.153159	0.147631	0.130429
R-HSA-1810476	RIP-mediated NFkB activation via ZBP1	0.168181	0.148441	0.140159
R-HSA-193639	p75NTR signals via NF-kB	0.180684	0.171261	0.146642
R-HSA-209543	p75NTR recruits signalling complexes	0.165935	0.165864	0.133862
R-HSA-209560	NF-kB is activated and signals survival	0.194838	0.182446	0.160012
R-HSA-445989	TAK1 activates NFkB by phosphorylation and activation of IKKs complex	0.176785	0.172587	0.165908
R-HSA-5357905	Regulation of TNFR1 signaling	0.132165	0.127411	0.111839
R-HSA-5357956	TNFR1-induced NFkappaB signaling pathway	0.13463	0.131511	0.11536
R-HSA-5684264	MAP3K8 (TPL2)-dependent MAPK1/3 activation	0.150439	0.150894	0.133726
R-HSA-75893	TNF signaling	0.130951	0.126184	0.110837
R-HSA-933542	TRAF6 mediated NF-kB activation	0.137231	0.13575	0.127139
R-HSA-933543	NF-kB activation through FADD/RIP-1 pathway mediated by caspase-8 and -10	0.149866	0.138296	0.12835
R-HSA-937039	IRAK1 recruits IKK complex	0.168189	0.169975	0.152928
R-HSA-975144	IRAK1 recruits IKK complex upon TLR7/8 or 9 stimulation	0.168189	0.169975	0.152928
R-HSA-1268020	Mitochondrial protein import	0.116194	0.125612	0.146349
R-HSA-3214847	HATs acetylate histones	0.100499	0.102234	0.0900852
R-HSA-110313	Translesion synthesis by Y family DNA polymerases bypasses lesions on DNA template	0.125383	0.134872	0.112397
R-HSA-5656169	Termination of translesion DNA synthesis	0.14573	0.160204	0.128438
R-HSA-73893	DNA Damage Bypass	0.124932	0.134434	0.112859
R-HSA-936440	Negative regulators of DDX58/IFIH1 signaling	0.134411	0.123397	0.10204
R-HSA-3000170	Syndecan interactions	0.160928	0.138888	0.15602
R-HSA-1483148	Synthesis of PG	0.142478	0.122548	0.121645
R-HSA-1483166	Synthesis of PA	0.0123576	0.0409835	-0.00339688
R-HSA-179812	GRB2 events in EGFR signaling	0.172631	0.156842	0.162199
R-HSA-180292	GAB1 signalosome	0.170393	0.152047	0.157795
R-HSA-180336	SHC1 events in EGFR signaling	0.172073	0.157696	0.160777
R-HSA-182971	EGFR downregulation	0.130868	0.132189	0.124216
R-HSA-212718	EGFR interacts with phospholipase C-gamma	0.17565	0.158372	0.16709
R-HSA-9634638	Estrogen-dependent nuclear events downstream of ESR-membrane signaling	0.153296	0.135315	0.139478
R-HSA-3928663	EPHA-mediated growth cone collapse	0.162521	0.167277	0.150518
R-HSA-400685	Sema4D in semaphorin signaling	0.168092	0.160793	0.146293
R-HSA-416572	Sema4D induced cell migration and growth-cone collapse	0.199901	0.189903	0.187329
R-HSA-445355	Smooth Muscle Contraction	0.125506	0.132667	0.10928
R-HSA-5625740	RHO GTPases activate PKNs	0.118373	0.123006	0.104399
R-HSA-5627117	RHO GTPases Activate ROCKs	0.19908	0.210205	0.177057
R-HSA-5627123	RHO GTPases activate PAKs	0.141928	0.141556	0.108292
R-HSA-6806834	Signaling by MET	0.121399	0.110127	0.109645
R-HSA-6807004	Negative regulation of MET activity	0.118524	0.113255	0.0976232
R-HSA-9706019	RHOBTB3 ATPase cycle	0.0723262	0.0804143	0.0808366
R-HSA-6804114	TP53 Regulates Transcription of Genes Involved in G2 Cell Cycle Arrest	0.114543	0.119166	0.133944
R-HSA-8854521	Interaction between PHLDA1 and AURKA	0.0936207	0.116994	0.167111
R-HSA-193775	Synthesis of bile acids and bile salts via 24-hydroxycholesterol	0.0515989	0.0767976	0.121194
R-HSA-2173788	Downregulation of TGF-beta receptor signaling	0.168966	0.157261	0.157769
R-HSA-2173789	TGF-beta receptor signaling activates SMADs	0.182444	0.166793	0.163857
R-HSA-450520	HuR (ELAVL1) binds and stabilizes mRNA	0.126684	0.113869	0.126129
R-HSA-69273	Cyclin A/B1/B2 associated events during G2/M transition	0.08833	0.0889165	0.10784
R-HSA-418359	Reduction of cytosolic Ca++ levels	0.248849	0.195092	0.238316
R-HSA-418360	Platelet calcium homeostasis	0.151397	0.102631	0.127723
R-HSA-445095	Interaction between L1 and Ankyrins	0.120644	0.130699	0.128391
R-HSA-416700	Other semaphorin interactions	0.141645	0.0899553	0.129846
R-HSA-72163	mRNA Splicing - Major Pathway	0.163467	0.164734	0.148926
R-HSA-72172	mRNA Splicing	0.161228	0.16262	0.146551
R-HSA-73817	Purine ribonucleoside monophosphate biosynthesis	0.0437162	0.045099	0.0822108
R-HSA-8956320	Nucleobase biosynthesis	0.0457796	0.0582567	0.0750464
R-HSA-6785470	tRNA processing in the mitochondrion	0.233163	0.230237	0.207425
R-HSA-6787450	tRNA modification in the mitochondrion	0.0457057	0.0687538	0.0742132
R-HSA-8868766	rRNA processing in the mitochondrion	0.130239	0.126934	0.136012
R-HSA-198323	AKT phosphorylates targets in the cytosol	0.1501	0.145337	0.138735
R-HSA-430039	mRNA decay by 5' to 3' exoribonuclease	0.226708	0.213869	0.202347
R-HSA-174824	Plasma lipoprotein assembly, remodeling, and clearance	0.125115	0.125935	0.123572
R-HSA-8964038	LDL clearance	0.183394	0.179967	0.184391
R-HSA-8964043	Plasma lipoprotein clearance	0.122619	0.12555	0.119466
R-HSA-389397	Orexin and neuropeptides FF and QRFP bind to their respective receptors	0.130046	0.0787849	0.149268
R-HSA-73762	RNA Polymerase I Transcription Initiation	0.0982257	0.0995001	0.0856404
R-HSA-73772	RNA Polymerase I Promoter Escape	0.0871027	0.106983	0.0896756
R-HSA-73854	RNA Polymerase I Promoter Clearance	0.10197	0.107466	0.0869817
R-HSA-73863	RNA Polymerase I Transcription Termination	0.0877254	0.0986605	0.0927137
R-HSA-73864	RNA Polymerase I Transcription	0.104618	0.110445	0.0884703
R-HSA-196299	Beta-catenin phosphorylation cascade	0.130393	0.108254	0.102166
R-HSA-8931987	RUNX1 regulates estrogen receptor mediated transcription	0.216182	0.220079	0.209829
R-HSA-8939256	RUNX1 regulates transcription of genes involved in WNT signaling	0.226265	0.230866	0.217111
R-HSA-389957	Prefoldin mediated transfer of substrate to CCT/TriC	0.197736	0.199184	0.21271
R-HSA-71240	Tryptophan catabolism	-0.037886	-0.0426166	0.0285127
R-HSA-3000157	Laminin interactions	0.265383	0.214169	0.229112
R-HSA-8874081	MET activates PTK2 signaling	0.185479	0.149053	0.178217
R-HSA-8875878	MET promotes cell motility	0.147764	0.120162	0.124366
R-HSA-927802	Nonsense-Mediated Decay (NMD)	0.256558	0.257472	0.230442
R-HSA-975957	Nonsense Mediated Decay (NMD) enhanced by the Exon Junction Complex (EJC)	0.256558	0.257472	0.230442
R-HSA-5368286	Mitochondrial translation initiation	0.164607	0.179862	0.207666
R-HSA-5368287	Mitochondrial translation	0.151997	0.171636	0.191591
R-HSA-5389840	Mitochondrial translation elongation	0.182924	0.201864	0.227289
R-HSA-5419276	Mitochondrial translation termination	0.181907	0.202023	0.227462
R-HSA-112311	Neurotransmitter clearance	0.0780797	0.115511	0.0863831
R-HSA-2161517	Abacavir transmembrane transport	0.0884399	-0.248542	-0.0160495
R-HSA-2161522	Abacavir transport and metabolism	0.137157	-0.00691169	0.12802
R-HSA-425366	Transport of bile salts and organic acids, metal ions and amine compounds	0.089691	0.0789613	0.0918524
R-HSA-442660	Na+/Cl- dependent neurotransmitter transporters	-0.00669021	-0.00890279	-0.000176876
R-HSA-549127	Organic cation transport	0.0506891	0.0677937	0.0356232
R-HSA-549132	Organic cation/anion/zwitterion transport	0.0506891	0.0677937	0.0356232
R-HSA-167044	Signalling to RAS	0.146636	0.130823	0.112699
R-HSA-171007	p38MAPK events	0.153358	0.1244	0.115594
R-HSA-187687	Signalling to ERKs	0.145262	0.122691	0.10788
R-HSA-376172	DSCAM interactions	0.121386	0.121066	0.0893297
R-HSA-390522	Striated Muscle Contraction	0.0790855	0.0846269	0.0817443
R-HSA-2142770	Synthesis of 15-eicosatetraenoic acid derivatives	0.278244	0.173243	0.255845
R-HSA-446205	Synthesis of GDP-mannose	-0.0617211	-0.104611	0.0126879
R-HSA-5693554	Resolution of D-loop Structures through Synthesis-Dependent Strand Annealing (SDSA)	0.0546988	0.0626278	0.0691525
R-HSA-1222556	ROS and RNS production in phagocytes	0.0926863	0.118087	0.098781
R-HSA-77387	Insulin receptor recycling	0.126128	0.131605	0.133967
R-HSA-917937	Iron uptake and transport	0.150876	0.153987	0.13974
R-HSA-917977	Transferrin endocytosis and recycling	0.121897	0.111869	0.133876
R-HSA-114452	Activation of BH3-only proteins	0.130932	0.125483	0.125251
R-HSA-139915	Activation of PUMA and translocation to mitochondria	0.111735	0.117681	0.127915
R-HSA-6803204	TP53 Regulates Transcription of Genes Involved in Cytochrome C Release	0.118917	0.116257	0.13403
R-HSA-6803205	TP53 regulates transcription of several additional cell death genes whose specific roles in p53-dependent apoptosis remain uncertain	0.11548	0.112637	0.125208
R-HSA-6804759	Regulation of TP53 Activity through Association with Co-factors	0.12305	0.112964	0.132692
R-HSA-1855204	Synthesis of IP3 and IP4 in the cytosol	0.0806467	0.0621207	0.0177965
R-HSA-1368071	NR1D1 (REV-ERBA) represses gene expression	0.155308	0.145694	0.101175
R-HSA-193670	p75NTR negatively regulates cell cycle via SC1	0.138055	0.138759	0.110916
R-HSA-2122947	NOTCH1 Intracellular Domain Regulates Transcription	0.134799	0.131942	0.116919
R-HSA-350054	Notch-HLH transcription pathway	0.139714	0.12798	0.103861
R-HSA-8940973	RUNX2 regulates osteoblast differentiation	0.147563	0.131862	0.122415
R-HSA-8941326	RUNX2 regulates bone development	0.145123	0.12778	0.117514
R-HSA-9022692	Regulation of MECP2 expression and activity	0.140569	0.133555	0.129606
R-HSA-9029569	NR1H3 & NR1H2 regulate gene expression linked to cholesterol transport and efflux	0.11137	0.103832	0.0979826
R-HSA-9701898	STAT3 nuclear events downstream of ALK signaling	0.13816	0.126896	0.110967
R-HSA-438066	Unblocking of NMDA receptors, glutamate binding and activation	0.0691302	0.0696506	0.0656974
R-HSA-8849932	Synaptic adhesion-like molecules	0.100247	0.0953897	0.0803929
R-HSA-9617324	Negative regulation of NMDA receptor-mediated neuronal transmission	0.0721817	0.0739437	0.0689552
R-HSA-9620244	Long-term potentiation	0.0881549	0.0823226	0.0771002
R-HSA-210991	Basigin interactions	0.191147	0.144638	0.166018
R-HSA-433692	Proton-coupled monocarboxylate transport	0.201355	0.112822	0.159067
R-HSA-425410	Metal ion SLC transporters	0.0723081	0.0704818	0.0900633
R-HSA-159418	Recycling of bile acids and salts	0.128472	0.126668	0.108378
R-HSA-1679131	Trafficking and processing of endosomal TLR	0.115801	0.126123	0.187054
R-HSA-9013957	TLR3-mediated TICAM1-dependent programmed cell death	0.13466	0.107899	0.0700324
R-HSA-9013973	TICAM1-dependent activation of IRF3/IRF7	0.168477	0.16509	0.128208
R-HSA-9014325	TICAM1,TRAF6-dependent induction of TAK1 complex	0.181636	0.177648	0.148463
R-HSA-912446	Meiotic recombination	0.0602242	0.0889879	0.0903306
R-HSA-4085001	Sialic acid metabolism	0.0741787	0.0827351	0.0617187
R-HSA-3322077	Glycogen synthesis	0.209585	0.217871	0.167705
R-HSA-70221	Glycogen breakdown (glycogenolysis)	0.0764961	0.0540475	0.120496
R-HSA-8982491	Glycogen metabolism	0.189102	0.194224	0.15966
R-HSA-1482788	Acyl chain remodelling of PC	0.0863161	0.0802024	0.126462
R-HSA-1482801	Acyl chain remodelling of PS	-0.00707694	0.062097	-0.0817377
R-HSA-1482839	Acyl chain remodelling of PE	0.0562569	0.0881987	0.0589445
R-HSA-1482922	Acyl chain remodelling of PI	0.0462065	0.142232	-0.00727388
R-HSA-1482925	Acyl chain remodelling of PG	-0.0347011	-0.044488	-0.0204926
R-HSA-190236	Signaling by FGFR	0.143952	0.13184	0.11644
R-HSA-203927	MicroRNA (miRNA) biogenesis	0.133817	0.135491	0.127426
R-HSA-5601884	PIWI-interacting RNA (piRNA) biogenesis	0.0907853	0.0884755	0.0806371
R-HSA-5654738	Signaling by FGFR2	0.144857	0.133522	0.116848
R-HSA-5696398	Nucleotide Excision Repair	0.128639	0.127985	0.119909
R-HSA-6781823	Formation of TC-NER Pre-Incision Complex	0.157053	0.153395	0.142645
R-HSA-6781827	Transcription-Coupled Nucleotide Excision Repair (TC-NER)	0.138851	0.140254	0.131503
R-HSA-6782135	Dual incision in TC-NER	0.13464	0.138877	0.125575
R-HSA-6782210	Gap-filling DNA repair synthesis and ligation in TC-NER	0.136848	0.141603	0.127388
R-HSA-6803529	FGFR2 alternative splicing	0.166273	0.15945	0.149046
R-HSA-72165	mRNA Splicing - Minor Pathway	0.180344	0.184634	0.172179
R-HSA-9670095	Inhibition of DNA recombination at telomere	0.125822	0.130799	0.121078
R-HSA-190241	FGFR2 ligand binding and activation	-0.122382	-0.0970717	-0.00796848
R-HSA-190242	FGFR1 ligand binding and activation	-0.0618916	-0.0443054	-0.0227586
R-HSA-190370	FGFR1b ligand binding and activation	-0.0366413	0.0181246	0.0312788
R-HSA-190377	FGFR2b ligand binding and activation	-0.104429	-0.0582181	0.0274876
R-HSA-5654219	Phospholipase C-mediated cascade: FGFR1	0.0752103	0.0515793	0.0335756
R-HSA-5654221	Phospholipase C-mediated cascade; FGFR2	0.0570524	0.0346231	0.021585
R-HSA-5654687	Downstream signaling of activated FGFR1	0.0838256	0.0613656	0.0471675
R-HSA-5654688	SHC-mediated cascade:FGFR1	0.134579	0.124146	0.0950643
R-HSA-5654689	PI-3K cascade:FGFR1	0.0907932	0.0533087	0.0481249
R-HSA-5654693	FRS-mediated FGFR1 signaling	0.085862	0.0651295	0.0536688
R-HSA-5654695	PI-3K cascade:FGFR2	0.081048	0.0448927	0.0409183
R-HSA-5654696	Downstream signaling of activated FGFR2	0.0815937	0.0563345	0.0444917
R-HSA-5654699	SHC-mediated cascade:FGFR2	0.121629	0.111484	0.0852042
R-HSA-5654700	FRS-mediated FGFR2 signaling	0.0806973	0.0602484	0.0498992
R-HSA-5654726	Negative regulation of FGFR1 signaling	0.157857	0.149637	0.118066
R-HSA-5654727	Negative regulation of FGFR2 signaling	0.157492	0.149551	0.118573
R-HSA-5654736	Signaling by FGFR1	0.134926	0.120036	0.0984773
R-HSA-5658623	FGFRL1 modulation of FGFR1 signaling	0.13886	0.126278	0.118225
R-HSA-110330	Recognition and association of DNA glycosylase with site containing an affected purine	0.122987	0.136452	0.125967
R-HSA-73884	Base Excision Repair	0.100278	0.109813	0.111581
R-HSA-73927	Depurination	0.122987	0.136452	0.125967
R-HSA-73929	Base-Excision Repair, AP Site Formation	0.12906	0.136682	0.12987
R-HSA-110328	Recognition and association of DNA glycosylase with site containing an affected pyrimidine	0.129521	0.137046	0.130115
R-HSA-110329	Cleavage of the damaged pyrimidine	0.129521	0.137046	0.130115
R-HSA-110331	Cleavage of the damaged purine	0.122987	0.136452	0.125967
R-HSA-110357	Displacement of DNA glycosylase by APEX1	0.184393	0.181215	0.166674
R-HSA-5649702	APEX1-Independent Resolution of AP Sites via the Single Nucleotide Replacement Pathway	-0.00723047	-0.00206111	0.00588173
R-HSA-73928	Depyrimidination	0.129521	0.137046	0.130115
R-HSA-73933	Resolution of Abasic Sites (AP sites)	0.0783985	0.0869657	0.0979323
R-HSA-196791	Vitamin D (calciferol) metabolism	0.0452564	0.0493437	0.0129736
R-HSA-211916	Vitamins	-0.417703	-0.389238	-0.118783
R-HSA-165158	Activation of AKT2	0.0538854	0.0690462	0.0480682
R-HSA-354192	Integrin signaling	0.134618	0.115447	0.10552
R-HSA-444257	RSK activation	0.13718	0.11055	0.111757
R-HSA-5218920	VEGFR2 mediated vascular permeability	0.11805	0.118127	0.0948338
R-HSA-5218921	VEGFR2 mediated cell proliferation	0.111671	0.0987548	0.0998197
R-HSA-76009	Platelet Aggregation (Plug Formation)	0.145133	0.125282	0.119856
R-HSA-9634635	Estrogen-stimulated signaling through PRKCZ	0.125968	0.117028	0.10639
R-HSA-983170	Antigen Presentation: Folding, assembly and peptide loading of class I MHC	0.137764	0.126236	0.135006
R-HSA-9013508	NOTCH3 Intracellular Domain Regulates Transcription	0.140936	0.113202	0.0995614
R-HSA-139853	Elevation of cytosolic Ca2+ levels	0.0633951	0.0219754	0.0298732
R-HSA-844456	The NLRP3 inflammasome	0.148905	0.13968	0.141711
R-HSA-1296052	Ca2+ activated K+ channels	-0.0404425	0.0351339	0.00186158
R-HSA-5221030	TET1,2,3 and TDG demethylate DNA	0.23535	0.248967	0.204964
R-HSA-416550	Sema4D mediated inhibition of cell attachment and migration	0.152102	0.135503	0.11838
R-HSA-427359	SIRT1 negatively regulates rRNA expression	0.103828	0.116594	0.0993784
R-HSA-975576	N-glycan antennae elongation in the medial/trans-Golgi	0.0322141	0.0288833	0.0253174
R-HSA-975577	N-Glycan antennae elongation	0.0763685	0.0597902	0.117867
R-HSA-5365859	RA biosynthesis pathway	-0.0136471	0.00627904	0.102935
R-HSA-8941237	Invadopodia formation	0.0555366	0.051933	-0.00706087
R-HSA-450302	activated TAK1 mediates p38 MAPK activation	0.164549	0.161839	0.140864
R-HSA-937042	IRAK2 mediated activation of TAK1 complex	0.181366	0.179864	0.152948
R-HSA-212300	PRC2 methylates histones and DNA	0.129381	0.133559	0.112329
R-HSA-111457	Release of apoptotic factors from the mitochondria	0.162383	0.166839	0.146406
R-HSA-174362	Transport and synthesis of PAPS	0.0890019	0.0849395	0.0984752
R-HSA-2408522	Selenoamino acid metabolism	0.255497	0.252016	0.242649
R-HSA-2408550	Metabolism of ingested H2SeO4 and H2SeO3 into H2Se	0.188302	0.1548	0.259652
R-HSA-70688	Proline catabolism	0.00267967	0.0816064	0.0514824
R-HSA-6806942	MET Receptor Activation	-0.0039084	-0.0405934	0.0253606
R-HSA-8852405	Signaling by MST1	-0.0955268	-0.0940673	0.0583788
R-HSA-189085	Digestion of dietary carbohydrate	0.221928	0.179839	0.105853
R-HSA-1638074	Keratan sulfate/keratin metabolism	0.0753744	0.108828	0.0711113
R-HSA-2022854	Keratan sulfate biosynthesis	0.0145605	0.061237	0.047093
R-HSA-913709	O-linked glycosylation of mucins	-0.0413063	0.0104721	-0.0694102
R-HSA-162791	Attachment of GPI anchor to uPAR	0.0551788	0.0185755	0.100847
R-HSA-418889	Caspase activation via Dependence Receptors in the absence of ligand	0.113005	0.106631	0.0909123
R-HSA-428543	Inactivation of CDC42 and RAC1	0.156101	0.152044	0.110206
R-HSA-111931	PKA-mediated phosphorylation of CREB	0.139299	0.119586	0.120273
R-HSA-111933	Calmodulin induced events	0.115417	0.116206	0.101594
R-HSA-111996	Ca-dependent events	0.116639	0.112486	0.100993
R-HSA-111997	CaM pathway	0.115417	0.116206	0.101594
R-HSA-112043	PLC beta mediated events	0.11376	0.10447	0.0953002
R-HSA-1489509	DAG and IP3 signaling	0.116566	0.109869	0.0956185
R-HSA-163359	Glucagon signaling in metabolic regulation	0.123048	0.120126	0.114298
R-HSA-163615	PKA activation	0.141474	0.128172	0.133229
R-HSA-164378	PKA activation in glucagon signalling	0.150678	0.137511	0.140991
R-HSA-170660	Adenylate cyclase activating pathway	-0.15316	-0.07312	-0.127058
R-HSA-1855167	Synthesis of pyrophosphates in the cytosol	0.0941772	0.134483	0.0530617
R-HSA-210746	Regulation of gene expression in endocrine-committed (NEUROG3+) progenitor cells	0.239897	0.214808	0.117467
R-HSA-9645460	Alpha-protein kinase 1 signaling pathway	0.181293	0.181118	0.153811
R-HSA-190239	FGFR3 ligand binding and activation	-0.208576	-0.162498	-0.0517875
R-HSA-190322	FGFR4 ligand binding and activation	-0.188739	-0.142756	-0.0439188
R-HSA-190372	FGFR3c ligand binding and activation	-0.208576	-0.162498	-0.0517875
R-HSA-190375	FGFR2c ligand binding and activation	-0.155964	-0.10607	-0.0294868
R-HSA-5654227	Phospholipase C-mediated cascade; FGFR3	0.0483579	0.0280747	0.0213293
R-HSA-5654228	Phospholipase C-mediated cascade; FGFR4	0.0505399	0.0279492	0.0210634
R-HSA-5654704	SHC-mediated cascade:FGFR3	0.118748	0.11009	0.087319
R-HSA-5654706	FRS-mediated FGFR3 signaling	0.0787715	0.0588887	0.0502697
R-HSA-5654708	Downstream signaling of activated FGFR3	0.0802399	0.0553393	0.0446954
R-HSA-5654710	PI-3K cascade:FGFR3	0.079949	0.0435758	0.0430292
R-HSA-5654712	FRS-mediated FGFR4 signaling	0.079401	0.0588549	0.0501951
R-HSA-5654716	Downstream signaling of activated FGFR4	0.0806815	0.0553155	0.044643
R-HSA-5654719	SHC-mediated cascade:FGFR4	0.120447	0.110011	0.0871467
R-HSA-5654720	PI-3K cascade:FGFR4	0.0809328	0.0435237	0.0429178
R-HSA-5654732	Negative regulation of FGFR3 signaling	0.157173	0.149521	0.119175
R-HSA-5654733	Negative regulation of FGFR4 signaling	0.157506	0.149506	0.119142
R-HSA-5654741	Signaling by FGFR3	0.130745	0.117337	0.0939538
R-HSA-5654743	Signaling by FGFR4	0.131891	0.11819	0.094464
R-HSA-5632681	Ligand-receptor interactions	-0.153019	-0.2075	-0.119783
R-HSA-9690406	Transcriptional regulation of testis differentiation	0.141483	0.0960691	0.116965
R-HSA-379716	Cytosolic tRNA aminoacylation	0.118117	0.115458	0.113636
R-HSA-379724	tRNA Aminoacylation	0.0674896	0.0758367	0.0771659
R-HSA-5689896	Ovarian tumor domain proteases	0.160451	0.162452	0.154094
R-HSA-9013418	RHOBTB2 GTPase cycle	0.156261	0.154843	0.134685
R-HSA-9013422	RHOBTB1 GTPase cycle	0.170563	0.173638	0.148391
R-HSA-9706574	RHOBTB GTPase Cycle	0.14666	0.143066	0.124184
R-HSA-1296072	Voltage gated Potassium channels	0.0589668	0.0100591	0.0644942
R-HSA-381033	ATF6 (ATF6-alpha) activates chaperones	0.122993	0.116114	0.115867
R-HSA-8874211	CREB3 factors activate genes	0.0796353	0.0957214	0.0964476
R-HSA-8963889	Assembly of active LPL and LIPC lipase complexes	0.100521	0.10383	0.0726419
R-HSA-8963899	Plasma lipoprotein remodeling	0.101314	0.110388	0.106739
R-HSA-422085	Synthesis, secretion, and deacylation of Ghrelin	0.131642	0.112833	0.103182
R-HSA-452723	Transcriptional regulation of pluripotent stem cells	0.0998885	0.0893623	0.082817
R-HSA-380972	Energy dependent regulation of mTOR by LKB1-AMPK	0.123569	0.125565	0.0937655
R-HSA-2534343	Interaction With Cumulus Cells And The Zona Pellucida	-0.0642391	-0.0220781	-0.000404152
R-HSA-427601	Multifunctional anion exchangers	-0.0191043	-0.0512183	-0.0572584
R-HSA-111446	Activation of BIM and translocation to mitochondria	0.124344	0.115861	0.105732
R-HSA-111453	BH3-only proteins associate with and inactivate anti-apoptotic BCL-2 members	0.168802	0.15038	0.16357
R-HSA-8952158	RUNX3 regulates BCL2L11 (BIM) transcription	0.174152	0.142424	0.129845
R-HSA-9614657	FOXO-mediated transcription of cell death genes	0.133047	0.114536	0.103495
R-HSA-9617629	Regulation of FOXO transcriptional activity by acetylation	0.149758	0.133882	0.135147
R-HSA-975578	Reactions specific to the complex N-glycan synthesis pathway	-0.00228469	0.00594652	-0.0443824
R-HSA-375281	Hormone ligand-binding receptors	-0.0625454	0.0191348	-0.00693397
R-HSA-9006115	Signaling by NTRK2 (TRKB)	0.111536	0.0986259	0.0903222
R-HSA-9028731	Activated NTRK2 signals through FRS2 and FRS3	0.0906198	0.0661853	0.0617369
R-HSA-1475029	Reversible hydration of carbon dioxide	0.1074	-0.0238981	0.118519
R-HSA-1295596	Spry regulation of FGF signaling	0.165837	0.156347	0.123969
R-HSA-74259	Purine catabolism	0.10533	0.144403	0.148833
R-HSA-8956319	Nucleobase catabolism	0.10211	0.0937956	0.121814
R-HSA-5620971	Pyroptosis	0.14116	0.141791	0.145025
R-HSA-428540	Activation of RAC1	0.0956106	0.097324	0.0582035
R-HSA-8985801	Regulation of cortical dendrite branching	0.0131428	0.0263921	-0.00187602
R-HSA-8963684	Tyrosine catabolism	-0.199688	-0.138359	-0.0629165
R-HSA-8963691	Phenylalanine and tyrosine metabolism	-0.00894961	0.125928	0.0544493
R-HSA-163680	AMPK inhibits chREBP transcriptional activation activity	0.0960497	0.104861	0.0774948
R-HSA-2151209	Activation of PPARGC1A (PGC-1alpha) by phosphorylation	0.0996308	0.0992056	0.0725179
R-HSA-9613354	Lipophagy	0.11742	0.119981	0.0953692
R-HSA-164952	The role of Nef in HIV-1 replication and disease pathogenesis	0.135288	0.139077	0.11423
R-HSA-2465910	MASTL Facilitates Mitotic Progression	0.105305	0.100705	0.134514
R-HSA-75067	Processing of Capped Intronless Pre-mRNA	0.174162	0.182397	0.171208
R-HSA-77595	Processing of Intronless Pre-mRNAs	0.172168	0.170771	0.167281
R-HSA-2160916	Hyaluronan uptake and degradation	0.176755	0.182219	0.200927
R-HSA-9033658	Blood group systems biosynthesis	-0.0404612	-0.0194973	-0.0662368
R-HSA-9037629	Lewis blood group biosynthesis	-0.0293376	-0.00520615	-0.0486155
R-HSA-5607763	CLEC7A (Dectin-1) induces NFAT activation	0.159113	0.142165	0.137473
R-HSA-2214320	Anchoring fibril formation	0.212017	0.193571	0.255674
R-HSA-2243919	Crosslinking of collagen fibrils	0.22397	0.202275	0.221714
R-HSA-111465	Apoptotic cleavage of cellular proteins	0.0977253	0.0938263	0.0933501
R-HSA-264870	Caspase-mediated cleavage of cytoskeletal proteins	0.0830743	0.0829432	0.0753761
R-HSA-113507	E2F-enabled inhibition of pre-replication complex formation	0.0211311	0.0177778	0.124611
R-HSA-113510	E2F mediated regulation of DNA replication	0.0796701	0.0812337	0.0844238
R-HSA-68616	Assembly of the ORC complex at the origin of replication	-0.0985379	-0.08868	0.0321768
R-HSA-194313	VEGF ligand-receptor interactions	0.227899	0.145384	0.1741
R-HSA-195399	VEGF binds to VEGFR leading to receptor dimerization	0.227899	0.145384	0.1741
R-HSA-5624958	ARL13B-mediated ciliary trafficking of INPP5E	0.109933	0.121771	0.123615
R-HSA-9648002	RAS processing	0.189448	0.181439	0.160251
R-HSA-2468052	Establishment of Sister Chromatid Cohesion	0.113834	0.150676	0.162891
R-HSA-2470946	Cohesin Loading onto Chromatin	0.140461	0.18104	0.179827
R-HSA-68884	Mitotic Telophase/Cytokinesis	0.101975	0.117168	0.136915
R-HSA-9031528	NR1H2 & NR1H3 regulate gene expression linked to triglyceride lipolysis in adipose	0.0885212	0.0581226	0.0619112
R-HSA-190371	FGFR3b ligand binding and activation	-0.413611	-0.40293	-0.271116
R-HSA-190373	FGFR1c ligand binding and activation	-0.130268	-0.0939489	-0.0388798
R-HSA-5205647	Mitophagy	0.164605	0.164796	0.14786
R-HSA-5205685	PINK1-PRKN Mediated Mitophagy	0.171497	0.171236	0.155448
R-HSA-5689877	Josephin domain DUBs	0.152764	0.147529	0.127684
R-HSA-9013419	RHOT2 GTPase cycle	0.0737839	0.0869151	0.0904521
R-HSA-9013425	RHOT1 GTPase cycle	0.160091	0.163931	0.150334
R-HSA-9715370	Miro GTPase Cycle	0.0848521	0.0805981	0.0803063
R-HSA-5625886	Activated PKN1 stimulates transcription of AR (androgen receptor) regulated genes KLK2 and KLK3	0.081623	0.097096	0.069567
R-HSA-4641263	Regulation of FZD by ubiquitination	0.196076	0.194806	0.151546
R-HSA-399719	Trafficking of AMPA receptors	0.0982413	0.106979	0.0980289
R-HSA-399721	Glutamate binding, activation of AMPA receptors and synaptic plasticity	0.0982413	0.106979	0.0980289
R-HSA-5682910	LGI-ADAM interactions	0.0546088	0.0655642	0.0465477
R-HSA-210744	Regulation of gene expression in late stage (branching morphogenesis) pancreatic bud precursor cells	0.135687	0.116226	0.09854
R-HSA-2046105	Linoleic acid (LA) metabolism	0.172254	0.104651	0.147446
R-HSA-447038	NrCAM interactions	0.114855	0.100561	0.103111
R-HSA-964739	N-glycan trimming and elongation in the cis-Golgi	0.185972	0.230715	0.139597
R-HSA-964827	Progressive trimming of alpha-1,2-linked mannose residues from Man9/8/7GlcNAc2 to produce Man5GlcNAc2	0.129303	0.195226	0.0832595
R-HSA-2892247	POU5F1 (OCT4), SOX2, NANOG activate genes related to proliferation	0.109433	0.108454	0.102597
R-HSA-434313	Intracellular metabolism of fatty acids regulates insulin secretion	0.115377	0.194325	0.0670226
R-HSA-8964011	HDL clearance	0.157653	0.189319	0.210261
R-HSA-163841	Gamma carboxylation, hypusine formation and arylsulfatase activation	0.103231	0.114273	0.0869912
R-HSA-156588	Glucuronidation	0.119997	0.148736	0.199961
R-HSA-9613829	Chaperone Mediated Autophagy	0.112888	0.116897	0.101024
R-HSA-5685938	HDR through Single Strand Annealing (SSA)	0.0627163	0.0662287	0.068607
R-HSA-110312	Translesion synthesis by REV1	0.129784	0.149663	0.124074
R-HSA-5655862	Translesion synthesis by POLK	0.130101	0.150312	0.124117
R-HSA-5656121	Translesion synthesis by POLI	0.126051	0.147156	0.119235
R-HSA-110056	MAPK3 (ERK1) activation	0.121963	0.0903244	0.121434
R-HSA-112409	RAF-independent MAPK1/3 activation	0.119562	0.0978674	0.118857
R-HSA-112411	MAPK1 (ERK2) activation	0.136254	0.106831	0.110494
R-HSA-1170546	Prolactin receptor signaling	0.0931157	0.0922884	0.0848207
R-HSA-6788467	IL-6-type cytokine receptor ligand interactions	0.0821001	0.0579934	0.104471
R-HSA-8854691	Interleukin-20 family signaling	0.123122	0.0963092	0.0906197
R-HSA-8984722	Interleukin-35 Signalling	0.119813	0.102876	0.0942787
R-HSA-9020933	Interleukin-23 signaling	0.0863338	0.0749906	0.0919747
R-HSA-9020956	Interleukin-27 signaling	0.119453	0.104497	0.100336
R-HSA-9027277	Erythropoietin activates Phospholipase C gamma (PLCG)	0.128843	0.114957	0.105221
R-HSA-9027283	Erythropoietin activates STAT5	0.148369	0.131532	0.125327
R-HSA-9027284	Erythropoietin activates RAS	0.130535	0.115223	0.0868942
R-HSA-8876725	Protein methylation	0.107738	0.0967239	0.0983918
R-HSA-173599	Formation of the active cofactor, UDP-glucuronate	0.185702	0.213433	0.26947
R-HSA-418990	Adherens junctions interactions	0.12334	0.115695	0.141738
R-HSA-2485179	Activation of the phototransduction cascade	0.143401	0.145718	0.131889
R-HSA-425561	Sodium/Calcium exchangers	0.163514	0.155005	0.158226
R-HSA-1482798	Acyl chain remodeling of CL	0.0397445	0.0307824	0.0608458
R-HSA-162699	Synthesis of dolichyl-phosphate mannose	0.316032	0.29207	0.309045
R-HSA-162658	Golgi Cisternae Pericentriolar Stack Reorganization	0.0559442	0.0552031	0.0555952
R-HSA-196819	Vitamin B1 (thiamin) metabolism	-0.05535	-0.0807399	-0.0712189
R-HSA-171306	Packaging Of Telomere Ends	0.126636	0.140285	0.129457
R-HSA-2299718	Condensation of Prophase Chromosomes	0.0970515	0.110946	0.117414
R-HSA-2559586	DNA Damage/Telomere Stress Induced Senescence	0.0986803	0.105486	0.110287
R-HSA-427389	ERCC6 (CSB) and EHMT2 (G9a) positively regulate rRNA expression	0.114724	0.124231	0.0935249
R-HSA-5334118	DNA methylation	0.123423	0.145939	0.122292
R-HSA-5693571	Nonhomologous End-Joining (NHEJ)	0.0719095	0.0831834	0.0703847
R-HSA-73728	RNA Polymerase I Promoter Opening	0.122241	0.139999	0.115253
R-HSA-9616222	Transcriptional regulation of granulopoiesis	0.116409	0.120577	0.110387
R-HSA-9634600	Regulation of glycolysis by fructose 2,6-bisphosphate metabolism	0.166971	0.144494	0.140234
R-HSA-419812	Calcitonin-like ligand receptors	0.24	0.259881	0.244929
R-HSA-193681	Ceramide signalling	0.114315	0.111308	0.105348
R-HSA-5626978	TNFR1-mediated ceramide production	0.315407	0.298019	0.308828
R-HSA-1368082	RORA activates gene expression	0.142764	0.112775	0.108026
R-HSA-1236977	Endosomal/Vacuolar pathway	0.232619	0.244009	0.266373
R-HSA-1592389	Activation of Matrix Metalloproteinases	0.105839	0.119606	0.118874
R-HSA-5223345	Miscellaneous transport and binding events	0.0783239	0.0991728	0.092574
R-HSA-5685939	HDR through MMEJ (alt-NHEJ)	0.0710236	0.0673552	0.0879475
R-HSA-5693548	Sensing of DNA Double Strand Breaks	0.0866473	0.0917294	0.0842474
R-HSA-2022857	Keratan sulfate degradation	0.131401	0.17792	0.108055
R-HSA-5576892	Phase 0 - rapid depolarisation	0.12032	0.147389	0.119633
R-HSA-1369007	Mitochondrial ABC transporters	-0.212328	-0.28927	-0.172956
R-HSA-2564830	Cytosolic iron-sulfur cluster assembly	0.076139	0.087693	0.0504944
R-HSA-3232118	SUMOylation of transcription factors	0.113709	0.114637	0.104947
R-HSA-428542	Regulation of commissural axon pathfinding by SLIT and ROBO	0.16348	0.143888	0.113446
R-HSA-9013407	RHOH GTPase cycle	0.135605	0.132712	0.122029
R-HSA-428890	Role of ABL in ROBO-SLIT signaling	0.132221	0.0955032	0.0826097
R-HSA-388844	Receptor-type tyrosine-protein phosphatases	0.0361529	0.0542259	0.0252931
R-HSA-5661270	Formation of xylulose-5-phosphate	0.151289	0.193423	0.160006
R-HSA-2142789	Ubiquinol biosynthesis	-0.00515601	0.0077524	-0.0414894
R-HSA-8978934	Metabolism of cofactors	0.109817	0.102187	0.0883813
R-HSA-2142712	Synthesis of 12-eicosatetraenoic acid derivatives	0.233688	0.210616	0.315127
R-HSA-8850843	Phosphate bond hydrolysis by NTPDase proteins	0.0152416	-0.0450671	0.00283057
R-HSA-2173795	Downregulation of SMAD2/3:SMAD4 transcriptional activity	0.162934	0.153516	0.127009
R-HSA-9623433	NR1H2 & NR1H3 regulate gene expression to control bile acid homeostasis	0.139677	0.121877	0.0956456
R-HSA-8854214	TBC/RABGAPs	0.0979081	0.104984	0.0848987
R-HSA-8934903	Receptor Mediated Mitophagy	0.123091	0.11332	0.108143
R-HSA-352230	Amino acid transport across the plasma membrane	0.0675862	0.0752555	0.0644251
R-HSA-176974	Unwinding of DNA	0.0273157	0.0485245	0.0714001
R-HSA-69190	DNA strand elongation	0.0418631	0.0702237	0.0808229
R-HSA-69205	G1/S-Specific Transcription	0.094153	0.102785	0.111718
R-HSA-8949613	Cristae formation	0.123049	0.138414	0.150303
R-HSA-8949215	Mitochondrial calcium ion transport	0.158297	0.175175	0.181324
R-HSA-8949664	Processing of SMDT1	0.125988	0.137943	0.150494
R-HSA-3371511	HSF1 activation	0.0957864	0.0978497	0.0822966
R-HSA-3371568	Attenuation phase	0.100187	0.0857396	0.0845545
R-HSA-3371571	HSF1-dependent transactivation	0.104499	0.0913878	0.0908902
R-HSA-8849468	PTK6 Regulates Proteins Involved in RNA Processing	0.139351	0.131396	0.11466
R-HSA-2995383	Initiation of Nuclear Envelope (NE) Reformation	0.121293	0.103771	0.137568
R-HSA-8866376	Reelin signalling pathway	0.120267	0.130912	0.106556
R-HSA-426486	Small interfering RNA (siRNA) biogenesis	0.179727	0.187059	0.146967
R-HSA-75892	Platelet Adhesion to exposed collagen	0.18991	0.167998	0.184642
R-HSA-198753	ERK/MAPK targets	0.141507	0.118711	0.116289
R-HSA-199920	CREB phosphorylation	0.198303	0.170133	0.149679
R-HSA-450282	MAPK targets/ Nuclear events mediated by MAP kinases	0.15471	0.133324	0.123461
R-HSA-5621575	CD209 (DC-SIGN) signaling	0.166587	0.155253	0.14635
R-HSA-1502540	Signaling by Activin	0.112987	0.078763	0.0739165
R-HSA-8849175	Threonine catabolism	-0.142436	-0.249138	-0.0566134
R-HSA-5357786	TNFR1-induced proapoptotic signaling	0.0489168	0.0452952	0.02066
R-HSA-203615	eNOS activation	0.119551	0.110606	0.0969847
R-HSA-6804754	Regulation of TP53 Expression	0.132015	0.12989	0.146435
R-HSA-9615933	Postmitotic nuclear pore complex (NPC) reformation	0.0805413	0.0800681	0.0758941
R-HSA-8963693	Aspartate and asparagine metabolism	-0.0626608	-0.0307633	0.0194106
R-HSA-3295583	TRP channels	0.0885837	0.0451536	0.03403
R-HSA-2022377	Metabolism of Angiotensinogen to Angiotensins	0.142779	0.156401	0.115588
R-HSA-9648895	Response of EIF2AK1 (HRI) to heme deficiency	0.095543	0.0968644	0.0790078
R-HSA-191273	Cholesterol biosynthesis	0.107276	0.104103	0.113236
R-HSA-6807047	Cholesterol biosynthesis via desmosterol	0.119222	0.125234	0.123205
R-HSA-6807062	Cholesterol biosynthesis via lathosterol	0.119222	0.125234	0.123205
R-HSA-389542	NADPH regeneration	0.378603	0.353897	0.369292
R-HSA-193807	Synthesis of bile acids and bile salts via 27-hydroxycholesterol	0.110347	0.109481	0.117695
R-HSA-196757	Metabolism of folate and pterines	-0.0348596	-0.0357153	0.0305431
R-HSA-1482883	Acyl chain remodeling of DAG and TAG	0.118358	0.0604319	0.0336138
R-HSA-75109	Triglyceride biosynthesis	0.068513	0.0672752	0.0583386
R-HSA-2187335	The retinoid cycle in cones (daylight vision)	-0.0122671	0.0765507	-0.0105987
R-HSA-114508	Effects of PIP2 hydrolysis	0.0874615	0.0510656	0.0809594
R-HSA-389359	CD28 dependent Vav1 pathway	0.125732	0.125779	0.0876414
R-HSA-5696395	Formation of Incision Complex in GG-NER	0.117172	0.119169	0.102164
R-HSA-5696399	Global Genome Nucleotide Excision Repair (GG-NER)	0.123876	0.125182	0.118208
R-HSA-71262	Carnitine synthesis	-0.137056	-0.123324	-0.0451359
R-HSA-163210	Formation of ATP by chemiosmotic coupling	0.293144	0.285	0.32781
R-HSA-1799339	SRP-dependent cotranslational protein targeting to membrane	0.32786	0.323209	0.312
R-HSA-6804758	Regulation of TP53 Activity through Acetylation	0.110784	0.104309	0.107135
R-HSA-162710	Synthesis of glycosylphosphatidylinositol (GPI)	0.0135848	0.0109921	0.0202986
R-HSA-110314	Recognition of DNA damage by PCNA-containing replication complex	0.14464	0.160021	0.136628
R-HSA-446210	Synthesis of UDP-N-acetyl-glucosamine	0.0512635	0.106313	0.12518
R-HSA-8985586	SLIT2:ROBO1 increases RHOA activity	0.225559	0.204565	0.194674
R-HSA-8964539	Glutamate and glutamine metabolism	0.176335	0.164037	0.178918
R-HSA-189445	Metabolism of porphyrins	0.0437688	0.0587573	0.0692913
R-HSA-189483	Heme degradation	0.115657	0.126319	0.155403
R-HSA-879518	Transport of organic anions	0.0717216	0.0107346	0.0509496
R-HSA-416993	Trafficking of GluR2-containing AMPA receptors	0.0617968	0.0716289	0.0643537
R-HSA-177504	Retrograde neurotrophin signalling	0.1546	0.154481	0.125983
R-HSA-5140745	WNT5A-dependent internalization of FZD2, FZD5 and ROR2	0.151997	0.153017	0.155177
R-HSA-8866427	VLDLR internalisation and degradation	0.117945	0.126404	0.0931119
R-HSA-73621	Pyrimidine catabolism	0.251291	0.176896	0.276586
R-HSA-2408552	Methylation of MeSeH for excretion	-0.0920407	-0.305093	-0.0933223
R-HSA-156711	Polo-like kinase mediated events	0.095841	0.0925954	0.116385
R-HSA-2514853	Condensation of Prometaphase Chromosomes	0.11649	0.107167	0.181598
R-HSA-2980767	Activation of NIMA Kinases NEK9, NEK6, NEK7	0.0817423	0.0838505	0.139657
R-HSA-69478	G2/M DNA replication checkpoint	0.102817	0.1094	0.187225
R-HSA-210745	Regulation of gene expression in beta cells	0.0839422	0.0993721	0.0751804
R-HSA-419408	Lysosphingolipid and LPA receptors	0.144314	0.157743	0.103088
R-HSA-196108	Pregnenolone biosynthesis	0.128399	0.129406	0.162894
R-HSA-418886	Netrin mediated repulsion signals	0.16739	0.141701	0.118956
R-HSA-1483248	Synthesis of PIPs at the ER membrane	0.0405428	0.047468	0.0468656
R-HSA-9012546	Interleukin-18 signaling	0.0628023	0.00229316	0.0534708
R-HSA-166187	Mitochondrial Uncoupling	-0.246079	-0.0655798	-0.20036
R-HSA-167826	The fatty acid cycling model	-0.246079	-0.0655798	-0.20036
R-HSA-167827	The proton buffering model	-0.246079	-0.0655798	-0.20036
R-HSA-1169092	Activation of RAS in B cells	0.181895	0.157145	0.123558
R-HSA-392517	Rap1 signalling	0.171154	0.154546	0.149316
R-HSA-71336	Pentose phosphate pathway	0.0938777	0.109865	0.121394
R-HSA-379726	Mitochondrial tRNA aminoacylation	0.0255016	0.0388514	0.0380912
R-HSA-1566948	Elastic fibre formation	0.137807	0.103217	0.111994
R-HSA-2129379	Molecules associated with elastic fibres	0.134251	0.103926	0.114515
R-HSA-947581	Molybdenum cofactor biosynthesis	-0.0791801	-0.0411798	-0.124342
R-HSA-427589	Type II Na+/Pi cotransporters	-0.00734404	-0.126122	-0.0286296
R-HSA-427652	Sodium-coupled phosphate cotransporters	0.077686	-0.0786906	-0.0269286
R-HSA-5683826	Surfactant metabolism	0.133368	0.096547	0.147596
R-HSA-380994	ATF4 activates genes in response to endoplasmic reticulum stress	0.0950074	0.0843893	0.0695385
R-HSA-381042	PERK regulates gene expression	0.118242	0.10871	0.101796
R-HSA-450604	KSRP (KHSRP) binds and destabilizes mRNA	0.130218	0.115872	0.103854
R-HSA-4419969	Depolymerisation of the Nuclear Lamina	0.108578	0.0956008	0.131467
R-HSA-8963896	HDL assembly	0.206457	0.18983	0.182133
R-HSA-8963898	Plasma lipoprotein assembly	0.132051	0.124237	0.140706
R-HSA-196807	Nicotinate metabolism	0.0846448	0.0828684	0.0837197
R-HSA-1614517	Sulfide oxidation to sulfate	0.0185749	0.0601208	0.0578272
R-HSA-1614558	Degradation of cysteine and homocysteine	0.0294621	0.050933	0.0395053
R-HSA-1614635	Sulfur amino acid metabolism	0.0600947	0.0800656	0.0783938
R-HSA-8864260	Transcriptional regulation by the AP-2 (TFAP2) family of transcription factors	0.166842	0.159878	0.1611
R-HSA-8866907	Activation of the TFAP2 (AP-2) family of transcription factors	0.158128	0.130808	0.143157
R-HSA-418890	Role of second messengers in netrin-1 signaling	0.127146	0.076611	0.0826859
R-HSA-2473224	Antagonism of Activin by Follistatin	-0.084587	-0.0216381	-0.095935
R-HSA-2025928	Calcineurin activates NFAT	0.190531	0.169605	0.14983
R-HSA-1307965	betaKlotho-mediated ligand binding	-0.487818	-0.36641	-0.277789
R-HSA-9014843	Interleukin-33 signaling	-0.0309006	-0.0790538	0.00225643
R-HSA-918233	TRAF3-dependent IRF activation pathway	0.130917	0.106744	0.096942
R-HSA-933541	TRAF6 mediated IRF7 activation	0.0876229	0.0789695	0.0625552
R-HSA-399997	Acetylcholine regulates insulin secretion	0.0981233	0.0901285	0.0870521
R-HSA-480985	Synthesis of dolichyl-phosphate-glucose	0.139238	0.0883975	0.1138
R-HSA-8941332	RUNX2 regulates genes involved in cell migration	0.155784	0.134925	0.134636
R-HSA-9008059	Interleukin-37 signaling	0.115235	0.0978285	0.0861499
R-HSA-5696394	DNA Damage Recognition in GG-NER	0.156307	0.151799	0.146718
R-HSA-1538133	G0 and Early G1	0.121692	0.131683	0.130767
R-HSA-69200	Phosphorylation of proteins involved in G1/S transition by active Cyclin E:Cdk2 complexes	0.0876821	0.0949983	0.105969
R-HSA-196836	Vitamin C (ascorbate) metabolism	0.148385	0.123555	0.138489
R-HSA-71384	Ethanol oxidation	-0.0387124	-0.000475215	0.136212
R-HSA-5652084	Fructose metabolism	-0.0201093	0.00257817	0.00111014
R-HSA-70350	Fructose catabolism	-0.0264823	0.000332375	-0.0142082
R-HSA-1474151	Tetrahydrobiopterin (BH4) synthesis, recycling, salvage and regulation	0.113506	0.103785	0.0940059
R-HSA-8964208	Phenylalanine metabolism	0.0698235	0.234461	0.107422
R-HSA-140837	Intrinsic Pathway of Fibrin Clot Formation	0.158522	0.196598	0.163802
R-HSA-140875	Common Pathway of Fibrin Clot Formation	0.091924	0.070204	0.113868
R-HSA-140877	Formation of Fibrin Clot (Clotting Cascade)	0.118029	0.122084	0.132337
R-HSA-70635	Urea cycle	0.146818	0.0504055	0.143974
R-HSA-74217	Purine salvage	0.198478	0.170925	0.204717
R-HSA-1251932	PLCG1 events in ERBB2 signaling	0.178448	0.162771	0.168948
R-HSA-2179392	EGFR Transactivation by Gastrin	0.161376	0.147791	0.150967
R-HSA-881907	Gastrin-CREB signalling pathway via PKC and MAPK	0.154184	0.13605	0.143017
R-HSA-8857538	PTK6 promotes HIF1A stabilization	0.204591	0.191856	0.194198
R-HSA-8866910	TFAP2 (AP-2) family regulates transcription of growth factors and their receptors	0.214585	0.204853	0.204748
R-HSA-5653890	Lactose synthesis	0.237289	0.0608615	0.261688
R-HSA-159740	Gamma-carboxylation of protein precursors	0.13183	0.177824	0.105612
R-HSA-159763	Transport of gamma-carboxylated protein precursors from the endoplasmic reticulum to the Golgi apparatus	0.132368	0.176912	0.106454
R-HSA-159782	Removal of aminoterminal propeptides from gamma-carboxylated proteins	0.145405	0.154059	0.0900882
R-HSA-159854	Gamma-carboxylation, transport, and amino-terminal cleavage of proteins	0.144318	0.15597	0.0901741
R-HSA-140834	Extrinsic Pathway of Fibrin Clot Formation	-0.060344	0.045983	-0.178221
R-HSA-173736	Alternative complement activation	-0.0557445	-0.0469775	0.0289149
R-HSA-75205	Dissolution of Fibrin Clot	0.0948584	0.066773	0.130403
R-HSA-174577	Activation of C3 and C5	0.0474447	0.0276889	0.0762529
R-HSA-1237044	Erythrocytes take up carbon dioxide and release oxygen	0.0463805	0.00289879	0.114636
R-HSA-1247673	Erythrocytes take up oxygen and release carbon dioxide	0.0827966	0.0178524	0.134124
R-HSA-1480926	O2/CO2 exchange in erythrocytes	0.0463805	0.00289879	0.114636
R-HSA-166665	Terminal pathway of complement	0.182716	0.234354	0.152266
R-HSA-450341	Activation of the AP-1 family of transcription factors	0.159883	0.140483	0.122138
R-HSA-1362277	Transcription of E2F targets under negative control by DREAM complex	0.1302	0.139313	0.134781
R-HSA-4411364	Binding of TCF/LEF:CTNNB1 to target gene promoters	0.144201	0.13782	0.136578
R-HSA-8866911	TFAP2 (AP-2) family regulates transcription of cell cycle factors	0.128742	0.132973	0.137835
R-HSA-8951430	RUNX3 regulates WNT signaling	0.154663	0.150101	0.153119
R-HSA-112412	SOS-mediated signalling	0.196261	0.179347	0.156394
R-HSA-2428933	SHC-related events triggered by IGF1R	0.177937	0.166501	0.130127
R-HSA-5674135	MAP2K and MAPK activation	0.165566	0.150982	0.147293
R-HSA-5675221	Negative regulation of MAPK pathway	0.155167	0.149071	0.124594
R-HSA-8849471	PTK6 Regulates RHO GTPases, RAS GTPase and MAP kinases	0.145639	0.13954	0.104057
R-HSA-8851805	MET activates RAS signaling	0.118204	0.091498	0.0939385
R-HSA-9026519	Activated NTRK2 signals through RAS	0.150452	0.13093	0.11826
R-HSA-9034015	Signaling by NTRK3 (TRKC)	0.143972	0.12479	0.105449
R-HSA-9034864	Activated NTRK3 signals through RAS	0.161161	0.139672	0.108489
R-HSA-8951936	RUNX3 regulates p14-ARF	0.17591	0.156934	0.162141
R-HSA-8964026	Chylomicron clearance	0.129198	0.132862	0.126849
R-HSA-2173791	TGF-beta receptor signaling in EMT (epithelial to mesenchymal transition)	0.169137	0.171327	0.144166
R-HSA-8941855	RUNX3 regulates CDKN1A transcription	0.127897	0.118946	0.121763
R-HSA-167021	PLC-gamma1 signalling	0.150011	0.117466	0.0829315
R-HSA-167060	NGF processing	0.181052	0.163858	0.131633
R-HSA-169893	Prolonged ERK activation events	0.143164	0.118176	0.101879
R-HSA-170968	Frs2-mediated activation	0.1506	0.122158	0.111244
R-HSA-170984	ARMS-mediated activation	0.157806	0.137387	0.114762
R-HSA-187015	Activation of TRKA receptors	0.111622	0.0735366	0.137949
R-HSA-187042	TRKA activation by NGF	0.222	0.212749	0.153196
R-HSA-187706	Signalling to p38 via RIT and RIN	0.276019	0.271732	0.256066
R-HSA-193697	p75NTR regulates axonogenesis	0.192001	0.197189	0.177714
R-HSA-198745	Signalling to STAT3	0.142174	0.129954	0.117599
R-HSA-205017	NFG and proNGF binds to p75NTR	0.130449	0.126346	0.103258
R-HSA-205025	NADE modulates death signalling	0.0761903	0.0918632	0.0486945
R-HSA-205043	NRIF signals cell death from the nucleus	0.182133	0.180467	0.153652
R-HSA-209563	Axonal growth stimulation	0.220122	0.220438	0.205364
R-HSA-9036866	Expression and Processing of Neurotrophins	0.181052	0.163858	0.131633
R-HSA-2032785	YAP1- and WWTR1 (TAZ)-stimulated gene expression	0.114226	0.0987565	0.0839011
R-HSA-5578768	Physiological factors	0.108766	0.101197	0.0870353
R-HSA-388479	Vasopressin-like receptors	0.0758936	0.169366	-0.0251449
R-HSA-193048	Androgen biosynthesis	0.0248521	0.0451601	0.0322909
R-HSA-194002	Glucocorticoid biosynthesis	0.0110651	0.0426053	0.0157326
R-HSA-209952	Peptide hormone biosynthesis	-0.0185682	-0.0252408	-0.021481
R-HSA-193993	Mineralocorticoid biosynthesis	0.127799	0.135434	0.134121
R-HSA-209776	Metabolism of amine-derived hormones	0.063395	0.0322275	0.000975813
R-HSA-209822	Glycoprotein hormones	0.00638128	-0.12992	-0.0497596
R-HSA-209968	Thyroxine biosynthesis	-0.272081	-0.407838	-0.313792
R-HSA-74713	IRS activation	0.156792	0.14604	0.142093
R-HSA-74749	Signal attenuation	0.136467	0.123198	0.107549
R-HSA-8877330	RUNX1 and FOXP3 control the development of regulatory T lymphocytes (Tregs)	0.0943934	0.0936904	0.0624217
R-HSA-448706	Interleukin-1 processing	0.176707	0.149477	0.158909
R-HSA-5660668	CLEC7A/inflammasome pathway	0.188467	0.154602	0.154496
R-HSA-1234158	Regulation of gene expression by Hypoxia-inducible Factor	0.179565	0.144441	0.146643
R-HSA-9020558	Interleukin-2 signaling	0.14568	0.11405	0.110256
R-HSA-1462054	Alpha-defensins	0.244398	0.236081	0.248286
R-HSA-449836	Other interleukin signaling	0.0592333	0.0638726	0.0635338
R-HSA-8981607	Intracellular oxygen transport	-0.105369	-0.456529	-0.221342
R-HSA-3000480	Scavenging by Class A Receptors	0.133089	0.127719	0.15532
R-HSA-430116	GP1b-IX-V activation signalling	0.172695	0.155909	0.158451
R-HSA-446107	Type I hemidesmosome assembly	0.160906	0.187219	0.180513
R-HSA-352238	Breakdown of the nuclear lamina	0.0422411	0.0443503	0.0550086
R-HSA-1369062	ABC transporters in lipid homeostasis	0.0447839	0.0893487	0.0755118
R-HSA-8963888	Chylomicron assembly	0.0908595	0.0911133	0.12493
R-HSA-8963901	Chylomicron remodeling	0.10672	0.112517	0.118969
R-HSA-8964058	HDL remodeling	0.110285	0.124995	0.139578
R-HSA-8866423	VLDL assembly	0.0790569	0.0752001	0.122171
R-HSA-8964046	VLDL clearance	0.133412	0.128149	0.151219
R-HSA-354194	GRB2:SOS provides linkage to MAPK signaling for Integrins	0.177846	0.156141	0.147719
R-HSA-372708	p130Cas linkage to MAPK signaling for integrins	0.156208	0.133281	0.121992
R-HSA-9619665	EGR2 and SOX10-mediated initiation of Schwann cell myelination	0.118795	0.115129	0.104644
R-HSA-181431	Acetylcholine binding and downstream events	0.143611	0.192893	0.156381
R-HSA-622323	Presynaptic nicotinic acetylcholine receptors	0.0476645	0.0835311	0.0910691
R-HSA-622327	Postsynaptic nicotinic acetylcholine receptors	0.143611	0.192893	0.156381
R-HSA-629594	Highly calcium permeable postsynaptic nicotinic acetylcholine receptors	0.143611	0.192893	0.156381
R-HSA-629597	Highly calcium permeable nicotinic acetylcholine receptors	0.0476645	0.0835311	0.0910691
R-HSA-425381	Bicarbonate transporters	0.0329981	0.0276913	0.0714505
R-HSA-1566977	Fibronectin matrix formation	0.218936	0.139128	0.189325
R-HSA-189451	Heme biosynthesis	-0.0115894	0.000400827	-0.00192208
R-HSA-6799990	Metal sequestration by antimicrobial proteins	0.100829	0.155017	0.171421
R-HSA-5660526	Response to metal ions	0.094794	0.116346	0.103204
R-HSA-5661231	Metallothioneins bind metals	0.100209	0.1236	0.120437
R-HSA-5621480	Dectin-2 family	0.146836	0.144511	0.147501
R-HSA-9708296	tRNA-derived small RNA (tsRNA or tRNA-related fragment, tRF) biogenesis	0.195659	0.176136	0.16511
R-HSA-5674499	Negative feedback regulation of MAPK pathway	0.178863	0.1795	0.172349
R-HSA-444473	Formyl peptide receptors bind formyl peptides and many other ligands	0.170716	0.168606	0.173661
R-HSA-444821	Relaxin receptors	0.226526	0.0526024	-0.0565535
R-HSA-3000484	Scavenging by Class F Receptors	0.1201	0.0947437	0.114071
R-HSA-3000497	Scavenging by Class H Receptors	0.360757	0.285902	0.388213
R-HSA-432142	Platelet sensitization by LDL	0.107952	0.100154	0.074653
R-HSA-8964041	LDL remodeling	0.321722	0.235591	0.272077
R-HSA-192456	Digestion of dietary lipid	-0.0938537	0.0203647	0.0391558
R-HSA-8939246	RUNX1 regulates transcription of genes involved in differentiation of myeloid cells	0.130711	0.105514	0.113021
R-HSA-8849473	PTK6 Expression	0.183632	0.181223	0.164629
R-HSA-879415	Advanced glycosylation endproduct receptor signaling	0.169553	0.168462	0.170828
R-HSA-9652282	Drug-mediated inhibition of ERBB2 signaling	0.151332	0.137474	0.130786
R-HSA-187024	NGF-independant TRKA activation	0.089365	0.0466235	0.121501
R-HSA-111448	Activation of NOXA and translocation to mitochondria	0.118904	0.122412	0.131445
R-HSA-2559584	Formation of Senescence-Associated Heterochromatin Foci (SAHF)	0.113901	0.116821	0.130685
R-HSA-6811555	PI5P Regulates TP53 Acetylation	0.096334	0.0870035	0.101315
R-HSA-69560	Transcriptional activation of p53 responsive genes	0.109726	0.110513	0.129309
R-HSA-69895	Transcriptional activation of cell cycle inhibitor p21	0.109726	0.110513	0.129309
R-HSA-2142670	Synthesis of epoxy (EET) and dihydroxyeicosatrienoic acids (DHET)	0.141645	-0.00289311	-0.0344637
R-HSA-2142816	Synthesis of (16-20)-hydroxyeicosatetraenoic acids (HETE)	0.0521125	0.0340747	-0.014206
R-HSA-9018677	Biosynthesis of DHA-derived SPMs	0.126268	0.054662	0.106319
R-HSA-9018678	Biosynthesis of specialized proresolving mediators (SPMs)	0.124106	0.0529626	0.109801
R-HSA-9018681	Biosynthesis of protectins	0.270071	0.215671	0.19084
R-HSA-1236973	Cross-presentation of particulate exogenous antigens (phagosomes)	0.15035	0.169624	0.143718
R-HSA-5668599	RHO GTPases Activate NADPH Oxidases	0.0959576	0.0835266	0.0857089
R-HSA-804914	Transport of fatty acids	0.0349666	0.0109534	0.13433
R-HSA-380612	Metabolism of serotonin	0.044825	0.131537	0.0486589
R-HSA-380615	Serotonin clearance from the synaptic cleft	-0.0258374	0.0342049	-0.0146626
R-HSA-210990	PECAM1 interactions	0.115761	0.105286	0.0834375
R-HSA-8941413	Events associated with phagocytolytic activity of PMN cells	0.386915	0.402853	0.35301
R-HSA-71032	Propionyl-CoA catabolism	0.0418217	0.111407	0.104801
R-HSA-156581	Methylation	0.110441	0.141802	0.137502
R-HSA-211957	Aromatic amines can be N-hydroxylated or N-dealkylated by CYP1A2	0.164501	0.173028	0.0812608
R-HSA-9018682	Biosynthesis of maresins	0.0370516	-0.0397249	0.0247596
R-HSA-9027307	Biosynthesis of maresin-like SPMs	-0.0494425	-0.0661443	-0.132201
R-HSA-211999	CYP2E1 reactions	-0.434486	-0.269435	-0.25179
R-HSA-72731	Recycling of eIF2:GDP	0.220479	0.203973	0.208232
R-HSA-9633012	Response of EIF2AK4 (GCN2) to amino acid deficiency	0.236918	0.236666	0.217392
R-HSA-156842	Eukaryotic Translation Elongation	0.321644	0.322417	0.307261
R-HSA-156902	Peptide chain elongation	0.325206	0.325784	0.308005
R-HSA-2408557	Selenocysteine synthesis	0.328688	0.326037	0.311148
R-HSA-72764	Eukaryotic Translation Termination	0.332329	0.33032	0.313839
R-HSA-975956	Nonsense Mediated Decay (NMD) independent of the Exon Junction Complex (EJC)	0.310078	0.311249	0.284841
R-HSA-8866904	Negative regulation of activity of TFAP2 (AP-2) family transcription factors	0.0658212	0.0518869	0.0451282
R-HSA-8866906	TFAP2 (AP-2) family regulates transcription of other transcription factors	0.230534	0.192806	0.18939
R-HSA-8869496	TFAP2A acts as a transcriptional repressor during retinoic acid induced cell differentiation	0.0565081	0.0594027	0.0716221
R-HSA-446343	Localization of the PINCH-ILK-PARVIN complex to focal adhesions	0.226361	0.204662	0.19106
R-HSA-446353	Cell-extracellular matrix interactions	0.182324	0.157138	0.158667
R-HSA-8875513	MET interacts with TNS proteins	0.156722	0.0914755	0.104522
R-HSA-844623	The IPAF inflammasome	-0.0315247	-0.146872	0.0762874
R-HSA-389513	CTLA4 inhibitory signaling	0.117941	0.108308	0.0905128
R-HSA-9706374	FLT3 signaling through SRC family kinases	0.138001	0.11617	0.114451
R-HSA-9032500	Activated NTRK2 signals through FYN	0.151656	0.138753	0.121729
R-HSA-9032759	NTRK2 activates RAC1	0.137909	0.129607	0.114092
R-HSA-1483191	Synthesis of PC	0.172456	0.169475	0.157573
R-HSA-113501	Inhibition of replication initiation of damaged DNA by RB1/E2F1	0.0995674	0.104274	0.0728111
R-HSA-1362300	Transcription of E2F targets under negative control by p107 (RBL1) and p130 (RBL2) in complex with HDAC1	0.115671	0.118799	0.114538
R-HSA-170145	Phosphorylation of proteins involved in the G2/M transition by Cyclin A:Cdc2 complexes	0.0730787	0.0698034	0.186182
R-HSA-176417	Phosphorylation of Emi1	0.0405627	0.0431462	0.111566
R-HSA-71288	Creatine metabolism	-0.0980113	-0.0151785	0.00701316
R-HSA-2197563	NOTCH2 intracellular domain regulates transcription	0.146625	0.101743	0.102215
R-HSA-110362	POLB-Dependent Long Patch Base Excision Repair	0.0794182	0.0757626	0.0940661
R-HSA-110373	Resolution of AP sites via the multiple-nucleotide patch replacement pathway	0.0824564	0.101075	0.106191
R-HSA-110381	Resolution of AP sites via the single-nucleotide replacement pathway	0.162223	0.170938	0.120211
R-HSA-5651801	PCNA-Dependent Long Patch Base Excision Repair	0.0806011	0.110749	0.101995
R-HSA-73930	Abasic sugar-phosphate removal via the single-nucleotide replacement pathway	0.167795	0.180309	0.102311
R-HSA-209905	Catecholamine biosynthesis	0.0944064	0.0946813	0.100202
R-HSA-2142688	Synthesis of 5-eicosatetraenoic acids	0.0961768	0.0313291	0.10179
R-HSA-2161541	Abacavir metabolism	0.166056	0.115612	0.211474
R-HSA-629587	Highly sodium permeable postsynaptic acetylcholine nicotinic receptors	0.14802	0.206498	0.194465
R-HSA-390696	Adrenoceptors	0.110776	0.074618	0.0748989
R-HSA-70370	Galactose catabolism	0.18873	0.123735	0.130624
R-HSA-5696400	Dual Incision in GG-NER	0.130856	0.140351	0.128768
R-HSA-190704	Oligomerization of connexins into connexons	0.0906005	0.0768407	0.114284
R-HSA-190827	Transport of connexins along the secretory pathway	0.0906005	0.0768407	0.114284
R-HSA-193634	Axonal growth inhibition (RHOA activation)	0.190645	0.197292	0.17619
R-HSA-193692	Regulated proteolysis of p75NTR	0.190183	0.176686	0.172892
R-HSA-5635851	GLI proteins bind promoters of Hh responsive genes to promote transcription	-0.0351695	-0.0302482	-0.0350766
R-HSA-166020	Transfer of LPS from LBP carrier to CD14	0.207285	0.118772	0.19625
R-HSA-8851907	MET activates PI3K/AKT signaling	0.082731	0.0428162	0.0347396
R-HSA-8865999	MET activates PTPN11	0.0849725	0.0426832	0.0223852
R-HSA-8875555	MET activates RAP1 and RAC1	0.114025	0.088007	0.0594809
R-HSA-8875656	MET receptor recycling	0.0953048	0.0647694	0.0363563
R-HSA-8875791	MET activates STAT3	0.117363	0.100229	0.0940592
R-HSA-9022699	MECP2 regulates neuronal receptors and channels	0.133316	0.105204	0.0965052
R-HSA-8939247	RUNX1 regulates transcription of genes involved in interleukin signaling	0.14577	0.141111	0.14248
R-HSA-1663150	The activation of arylsulfatases	0.102962	0.118361	0.096238
R-HSA-390666	Serotonin receptors	0.343725	0.336283	0.326466
R-HSA-392023	Adrenaline signalling through Alpha-2 adrenergic receptor	0.11273	-0.0440057	-0.014364
R-HSA-190873	Gap junction degradation	0.160935	0.163532	0.148295
R-HSA-196025	Formation of annular gap junctions	0.163502	0.165275	0.150223
R-HSA-6783984	Glycine degradation	0.0542154	0.0632822	0.139478
R-HSA-174411	Polymerase switching on the C-strand of the telomere	0.119224	0.127229	0.123782
R-HSA-174417	Telomere C-strand (Lagging Strand) Synthesis	0.105269	0.117548	0.117151
R-HSA-174430	Telomere C-strand synthesis initiation	0.127099	0.127236	0.112627
R-HSA-68952	DNA replication initiation	0.0370681	0.0481796	-0.0192868
R-HSA-69091	Polymerase switching	0.0961138	0.118533	0.126441
R-HSA-69109	Leading Strand Synthesis	0.0961138	0.118533	0.126441
R-HSA-69166	Removal of the Flap Intermediate	0.0290093	0.074945	0.0889584
R-HSA-69183	Processive synthesis on the lagging strand	0.0262187	0.0705601	0.089195
R-HSA-69186	Lagging Strand Synthesis	0.0493904	0.0851385	0.0865373
R-HSA-2142691	Synthesis of Leukotrienes (LT) and Eoxins (EX)	0.101414	0.0547982	0.126081
R-HSA-2142700	Synthesis of Lipoxins (LX)	0.0797752	0.0183264	0.0864704
R-HSA-9018676	Biosynthesis of D-series resolvins	0.0790993	-0.000735326	0.063952
R-HSA-9018679	Biosynthesis of EPA-derived SPMs	0.130515	0.0368191	0.0966806
R-HSA-9018683	Biosynthesis of DPA-derived SPMs	0.147753	0.0583568	0.117614
R-HSA-9018896	Biosynthesis of E-series 18(S)-resolvins	0.101721	0.0300712	0.0877544
R-HSA-9020265	Biosynthesis of aspirin-triggered D-series resolvins	0.0988682	0.015211	0.0795276
R-HSA-9023661	Biosynthesis of E-series 18(R)-resolvins	0.121035	0.0461772	0.103365
R-HSA-9025094	Biosynthesis of DPAn-3 SPMs	0.147753	0.0583568	0.117614
R-HSA-9026286	Biosynthesis of DPAn-3-derived protectins and resolvins	0.0888274	0.0190792	0.0822702
R-HSA-9026290	Biosynthesis of DPAn-3-derived maresins	0.0943754	0.0212637	0.0855306
R-HSA-9026403	Biosynthesis of DPAn-3-derived 13-series resolvins	0.0604503	-0.0190505	0.0532927
R-HSA-9027604	Biosynthesis of electrophilic 蠅-3 PUFA oxo-derivatives	0.102171	-0.00419735	0.0686804
R-HSA-156587	Amino Acid conjugation	-0.104826	-0.0594667	-0.0936289
R-HSA-159424	Conjugation of carboxylic acids	-0.104826	-0.0594667	-0.0936289
R-HSA-177128	Conjugation of salicylate with glycine	-0.104826	-0.0594667	-0.0936289
R-HSA-1483115	Hydrolysis of LPC	-0.135356	-0.0303596	-0.124059
R-HSA-110320	Translesion Synthesis by POLH	0.137093	0.147063	0.132256
R-HSA-1253288	Downregulation of ERBB4 signaling	0.194332	0.192823	0.160347
R-HSA-3134975	Regulation of innate immune responses to cytosolic DNA	0.16464	0.155377	0.124969
R-HSA-5696397	Gap-filling DNA repair synthesis and ligation in GG-NER	0.142031	0.15834	0.135271
R-HSA-8849469	PTK6 Regulates RTKs and Their Effectors AKT1 and DOK1	0.183185	0.166052	0.140552
R-HSA-8948747	Regulation of PTEN localization	0.15138	0.154935	0.123218
R-HSA-9664873	Pexophagy	0.162708	0.156717	0.129496
R-HSA-975110	TRAF6 mediated IRF7 activation in TLR7/8 or 9 signaling	0.169739	0.16919	0.14293
R-HSA-417973	Adenosine P1 receptors	-0.0108993	-0.102366	0.0236832
R-HSA-1614603	Cysteine formation from homocysteine	0.112976	0.112516	0.103096
R-HSA-111932	CaMK IV-mediated phosphorylation of CREB	0.163909	0.172165	0.136155
R-HSA-111957	Cam-PDE 1 activation	0.0264514	0.10688	0.0487297
R-HSA-180024	DARPP-32 events	0.124662	0.117084	0.115168
R-HSA-442720	CREB1 phosphorylation through the activation of Adenylate Cyclase	0.157739	0.131353	0.137002
R-HSA-442729	CREB1 phosphorylation through the activation of CaMKII/CaMKK/CaMKIV cascasde	0.140984	0.150624	0.102417
R-HSA-451306	Ionotropic activity of kainate receptors	0.0994857	0.0939722	0.0957669
R-HSA-451308	Activation of Ca-permeable Kainate Receptor	0.0994857	0.0939722	0.0957669
R-HSA-9619229	Activation of RAC1 downstream of NMDARs	0.148071	0.150437	0.103239
R-HSA-8941284	RUNX2 regulates chondrocyte maturation	0.138132	0.128123	0.152129
R-HSA-1362409	Mitochondrial iron-sulfur cluster biogenesis	0.138198	0.163347	0.187314
R-HSA-2395516	Electron transport from NADPH to Ferredoxin	-0.168445	-0.0635769	0.120618
R-HSA-75108	Activation, myristolyation of BID and translocation to mitochondria	0.148017	0.12836	0.119313
R-HSA-1300645	Acrosome Reaction and Sperm:Oocyte Membrane Binding	0.173435	0.151878	0.163991
R-HSA-111447	Activation of BAD and translocation to mitochondria	0.145269	0.13225	0.129083
R-HSA-844455	The NLRP1 inflammasome	0.185925	0.138938	0.195209
R-HSA-8949275	RUNX3 Regulates Immune Response and Cell Migration	0.145389	0.102881	0.166138
R-HSA-5676934	Protein repair	0.146816	0.164227	0.150284
R-HSA-211935	Fatty acids	-0.04226	-0.0540541	0.0908449
R-HSA-211958	Miscellaneous substrates	-0.165156	-0.124349	-0.00510671
R-HSA-381183	ATF6 (ATF6-alpha) activates chaperone genes	0.124177	0.116737	0.117918
R-HSA-8963676	Intestinal absorption	0.116369	0.177917	0.114087
R-HSA-8981373	Intestinal hexose absorption	0.116369	0.177917	0.114087
R-HSA-500753	Pyrimidine biosynthesis	0.0515994	0.0951905	0.0540887
R-HSA-156582	Acetylation	-0.0171925	-0.0115238	-0.046699
R-HSA-77286	mitochondrial fatty acid beta-oxidation of saturated fatty acids	0.166636	0.212193	0.202934
R-HSA-77288	mitochondrial fatty acid beta-oxidation of unsaturated fatty acids	0.205383	0.223157	0.305081
R-HSA-77346	Beta oxidation of decanoyl-CoA to octanoyl-CoA-CoA	0.192818	0.225923	0.238535
R-HSA-77348	Beta oxidation of octanoyl-CoA to hexanoyl-CoA	0.217708	0.24839	0.251433
R-HSA-190374	FGFR1c and Klotho ligand binding and activation	0.0355263	0.0723456	0.0742594
R-HSA-8849470	PTK6 Regulates Cell Cycle	0.0707568	0.083772	0.116829
R-HSA-73843	5-Phosphoribose 1-diphosphate biosynthesis	0.0781491	0.105274	0.0667162
R-HSA-174414	Processive synthesis on the C-strand of the telomere	0.120425	0.135793	0.146573
R-HSA-174437	Removal of the Flap Intermediate from the C-strand	0.126367	0.142621	0.149525
R-HSA-5358508	Mismatch Repair	0.0578622	0.0889412	0.0995179
R-HSA-5358565	Mismatch repair (MMR) directed by MSH2:MSH6 (MutSalpha)	0.0578622	0.0889412	0.0995179
R-HSA-5358606	Mismatch repair (MMR) directed by MSH2:MSH3 (MutSbeta)	0.0544998	0.0858278	0.0961353
R-HSA-446388	Regulation of cytoskeletal remodeling and cell spreading by IPP complex components	0.146564	0.129032	0.108492
R-HSA-351906	Apoptotic cleavage of cell adhesion proteins	0.127772	0.115815	0.126985
R-HSA-191650	Regulation of gap junction activity	0.114491	0.0895934	0.0956809
R-HSA-8934593	Regulation of RUNX1 Expression and Activity	0.1474	0.14007	0.127994
R-HSA-9603381	Activated NTRK3 signals through PI3K	0.15497	0.124604	0.111602
R-HSA-1834941	STING mediated induction of host immune responses	0.104778	0.0918214	0.0822904
R-HSA-3270619	IRF3-mediated induction of type I IFN	0.116018	0.108527	0.100661
R-HSA-5627083	RHO GTPases regulate CFTR trafficking	0.323952	0.330001	0.333849
R-HSA-211979	Eicosanoids	-0.0429793	-0.0473577	0.11316
R-HSA-5358493	Synthesis of diphthamide-EEF2	0.0120287	0.00122441	-0.00454987
R-HSA-196843	Vitamin B2 (riboflavin) metabolism	0.0746587	0.0938916	0.0433862
R-HSA-9010642	ROBO receptors bind AKAP5	0.136461	0.12134	0.122765
R-HSA-390651	Dopamine receptors	-0.00781363	0.00560529	-0.0666029
R-HSA-111367	SLBP independent Processing of Histone Pre-mRNAs	0.193972	0.211788	0.188067
R-HSA-77588	SLBP Dependent Processing of Replication-Dependent Histone Pre-mRNAs	0.188856	0.207067	0.184053
R-HSA-5662702	Melanin biosynthesis	-0.0320737	0.111149	0.127588
R-HSA-8983432	Interleukin-15 signaling	0.140491	0.128486	0.109663
R-HSA-112313	Neurotransmitter uptake and metabolism In glial cells	0.0374385	0.0804789	0.0696356
R-HSA-210455	Astrocytic Glutamate-Glutamine Uptake And Metabolism	0.0374385	0.0804789	0.0696356
R-HSA-5652227	Fructose biosynthesis	0.0539799	0.0298573	0.162272
R-HSA-420597	Nectin/Necl trans heterodimerization	0.0687372	0.0828303	0.10186
R-HSA-8985947	Interleukin-9 signaling	0.160019	0.118519	0.118149
R-HSA-5576890	Phase 3 - rapid repolarisation	-0.0114646	-0.0637104	-0.0615119
R-HSA-5576893	Phase 2 - plateau phase	-0.000874534	-0.0501274	-0.0585296
R-HSA-977068	Termination of O-glycan biosynthesis	-0.0598187	-0.0189263	-0.0741052
R-HSA-9025106	Biosynthesis of DPAn-6 SPMs	0.464541	0.477043	0.470763
R-HSA-163358	PKA-mediated phosphorylation of key metabolic factors	0.186396	0.15935	0.168444
R-HSA-163767	PP2A-mediated dephosphorylation of key metabolic factors	0.137314	0.127709	0.102095
R-HSA-77350	Beta oxidation of hexanoyl-CoA to butanoyl-CoA	0.188763	0.232943	0.220704
R-HSA-77352	Beta oxidation of butanoyl-CoA to acetyl-CoA	0.0555478	0.146473	0.118845
R-HSA-9022707	MECP2 regulates transcription factors	0.154826	0.139063	0.10423
R-HSA-196783	Coenzyme A biosynthesis	0.111292	0.0760738	0.123408
R-HSA-9033807	ABO blood group biosynthesis	-0.0169508	-0.047287	-0.0726362
R-HSA-5657655	MGMT-mediated DNA damage reversal	0.416658	0.395645	0.375241
R-HSA-73942	DNA Damage Reversal	0.0619474	0.0594271	0.030573
R-HSA-1237112	Methionine salvage pathway	0.110211	0.130852	0.143234
R-HSA-209931	Serotonin and melatonin biosynthesis	0.130921	0.116508	0.059125
R-HSA-8941333	RUNX2 regulates genes involved in differentiation of myeloid cells	0.0734802	0.102342	0.0746152
R-HSA-390450	Folding of actin by CCT/TriC	0.16436	0.17131	0.174978
R-HSA-8849472	PTK6 Down-Regulation	0.112062	0.0790928	0.0875337
R-HSA-2142696	Synthesis of Hepoxilins (HX) and Trioxilins (TrX)	0.497056	0.489341	0.490864
R-HSA-9026527	Activated NTRK2 signals through PLCG1	0.0975355	0.0639005	0.0703706
R-HSA-9034793	Activated NTRK3 signals through PLCG1	0.11139	0.0713019	0.0490814
R-HSA-425986	Sodium/Proton exchangers	-0.0563947	0.0239137	-0.0823152
R-HSA-9031525	NR1H2 & NR1H3 regulate gene expression to limit cholesterol uptake	0.0605218	0.0457981	0.0130696
R-HSA-9632974	NR1H2 & NR1H3 regulate gene expression linked to gluconeogenesis	0.124434	0.128595	0.0850444
R-HSA-3134963	DEx/H-box helicases activate type I IFN and inflammatory cytokines production	0.201353	0.175557	0.159651
R-HSA-380095	Tachykinin receptors bind tachykinins	0.115673	-0.00112719	0.147406
R-HSA-9025046	NTF3 activates NTRK2 (TRKB) signaling	-0.259675	-0.271566	0.149568
R-HSA-9034013	NTF3 activates NTRK3 signaling	-0.0573038	-0.442036	-0.0309106
R-HSA-5660489	MTF1 activates gene expression	0.0879863	0.129392	0.0637339
R-HSA-140179	Amine Oxidase reactions	0.00924616	0.0144599	-0.0070469
R-HSA-141333	Biogenic amines are oxidatively deaminated to aldehydes by MAOA and MAOB	0.00393107	0.0446946	-0.0542383
R-HSA-379397	Enzymatic degradation of dopamine by COMT	0.0603417	0.102452	0.0836546
R-HSA-379398	Enzymatic degradation of Dopamine by monoamine oxidase	0.0683294	0.110667	0.0896562
R-HSA-379401	Dopamine clearance from the synaptic cleft	0.0592545	0.105486	0.0803659
R-HSA-351200	Interconversion of polyamines	0.134586	0.118257	0.14188
R-HSA-391903	Eicosanoid ligand-binding receptors	0.0398321	0.0254957	0.0565949
R-HSA-391908	Prostanoid ligand receptors	0.113305	-0.0107599	0.0730309
R-HSA-9020958	Interleukin-21 signaling	0.157693	0.11506	0.11133
R-HSA-2408508	Metabolism of ingested SeMet, Sec, MeSec into H2Se	0.068297	0.0897613	0.0924001
R-HSA-9024909	BDNF activates NTRK2 (TRKB) signaling	-0.298675	-0.298993	0.0560147
R-HSA-9028335	Activated NTRK2 signals through PI3K	0.0881557	0.0484599	0.0528329
R-HSA-9032845	Activated NTRK2 signals through CDK5	0.11881	0.12431	0.127542
R-HSA-8964540	Alanine metabolism	-0.472795	-0.315044	-0.472084
R-HSA-74182	Ketone body metabolism	0.0980606	0.0513133	0.0692409
R-HSA-77108	Utilization of Ketone Bodies	0.0601169	-0.0304886	0.0590598
R-HSA-77111	Synthesis of Ketone Bodies	0.154684	0.0970374	0.0850552
R-HSA-390650	Histamine receptors	0.249163	-0.208964	0.0317227
R-HSA-75157	FasL/ CD95L signaling	0.139484	0.121039	0.0880398
R-HSA-4755510	SUMOylation of immune response proteins	0.14425	0.133865	0.120715
R-HSA-450513	Tristetraprolin (TTP, ZFP36) binds and destabilizes mRNA	0.132008	0.118143	0.0999023
R-HSA-202670	ERKs are inactivated	0.123712	0.108238	0.108301
R-HSA-77285	Beta oxidation of myristoyl-CoA to lauroyl-CoA	0.227811	0.258279	0.279508
R-HSA-77310	Beta oxidation of lauroyl-CoA to decanoyl-CoA-CoA	0.223013	0.252483	0.262867
R-HSA-8951671	RUNX3 regulates YAP1-mediated transcription	0.128233	0.108024	0.0925395
R-HSA-111995	phospho-PLA2 pathway	0.131326	0.109828	0.10256
R-HSA-163754	Insulin effects increased synthesis of Xylulose-5-Phosphate	0.317683	0.310578	0.350608
R-HSA-203754	NOSIP mediated eNOS trafficking	0.0423229	0.0441562	-0.0068501
R-HSA-888593	Reuptake of GABA	0.0298151	-0.0174933	0.107816
R-HSA-217271	FMO oxidises nucleophiles	-0.177838	-0.104032	-0.0898146
R-HSA-211163	AKT-mediated inactivation of FOXO1A	0.13919	0.128592	0.132564
R-HSA-450385	Butyrate Response Factor 1 (BRF1) binds and destabilizes mRNA	0.134045	0.117651	0.101664
R-HSA-109703	PKB-mediated events	0.0296739	0.0167295	0.00829283
R-HSA-165160	PDE3B signalling	0.0296739	0.0167295	0.00829283
R-HSA-165181	Inhibition of TSC complex formation by PKB	0.247449	0.246422	0.239674
R-HSA-72200	mRNA Editing: C to U Conversion	0.0422382	0.059525	0.0531079
R-HSA-75072	mRNA Editing	0.119601	0.128727	0.104158
R-HSA-75094	Formation of the Editosome	0.0422382	0.059525	0.0531079
R-HSA-8939245	RUNX1 regulates transcription of genes involved in BCR signaling	0.0890679	0.0945946	0.0861635
R-HSA-5625970	RHO GTPases activate KTN1	0.17727	0.176626	0.142619
R-HSA-9026357	NTF4 activates NTRK2 (TRKB) signaling	-0.121018	-0.121309	0.128322
R-HSA-3134973	LRR FLII-interacting protein 1 (LRRFIP1) activates type I IFN production	0.160196	0.125135	0.134368
R-HSA-197264	Nicotinamide salvaging	0.157773	0.132621	0.150971
R-HSA-1483213	Synthesis of PE	-0.00176759	0.0415731	-0.0373821
R-HSA-9013695	NOTCH4 Intracellular Domain Regulates Transcription	0.145393	0.1173	0.100164
R-HSA-112303	Electric Transmission Across Gap Junctions	-0.0245882	-0.0671391	0.0615463
R-HSA-112307	Transmission across Electrical Synapses	-0.0245882	-0.0671391	0.0615463
R-HSA-4641265	Repression of WNT target genes	0.11124	0.108205	0.0843139
R-HSA-2393930	Phosphate bond hydrolysis by NUDT proteins	0.0226622	0.104775	0.117515
R-HSA-9645135	STAT5 Activation	0.163998	0.117088	0.122739
R-HSA-451307	Activation of Na-permeable kainate receptors	-0.502944	-0.333418	-0.501218
R-HSA-77305	Beta oxidation of palmitoyl-CoA to myristoyl-CoA	0.215604	0.249449	0.260192
R-HSA-3249367	STAT6-mediated induction of chemokines	0.131896	0.0940071	0.0860487
R-HSA-399710	Activation of AMPA receptors	0.0069221	-0.0501185	-0.0770982
R-HSA-211736	Stimulation of the cell death response by PAK-2p34	0.132134	0.170973	0.066336
R-HSA-139910	Activation of BMF and translocation to mitochondria	0.175824	0.173759	0.148301
R-HSA-9007892	Interleukin-38 signaling	0.168372	0.144488	0.104267
R-HSA-427975	Proton/oligopeptide cotransporters	0.0591747	0.0282915	0.0377917
R-HSA-1912399	Pre-NOTCH Processing in the Endoplasmic Reticulum	0.226236	0.204681	0.1748
R-HSA-8941856	RUNX3 regulates NOTCH signaling	0.138497	0.117618	0.0968094
R-HSA-1296067	Potassium transport channels	0.227845	-0.0812608	0.262867
R-HSA-1296053	Classical Kir channels	0.0494685	-0.020276	-0.0452534
R-HSA-8847453	Synthesis of PIPs in the nucleus	0.045086	-0.00346378	0.0144502
R-HSA-2892245	POU5F1 (OCT4), SOX2, NANOG repress genes related to differentiation	0.116356	0.0920691	0.127996
R-HSA-1483101	Synthesis of PS	0.155624	0.132913	0.208601
R-HSA-1483196	PI and PC transport between ER and Golgi membranes	0.139591	0.211825	0.038225
R-HSA-3296197	Hydroxycarboxylic acid-binding receptors	-0.389572	-0.482233	-0.0486285
R-HSA-204626	Hypusine synthesis from eIF5A-lysine	0.187877	0.194102	0.272194
R-HSA-6798163	Choline catabolism	0.196152	0.0712546	0.253993
R-HSA-8877627	Vitamin E	0.041854	0.0495967	0.0628144
R-HSA-9017802	Noncanonical activation of NOTCH3	0.239291	0.249632	0.250335
R-HSA-350864	Regulation of thyroid hormone activity	-0.496752	-0.484469	-0.332301
R-HSA-9022927	MECP2 regulates transcription of genes involved in GABA signaling	0.000278811	0.00785133	0.057602
R-HSA-68881	Mitotic Metaphase/Anaphase Transition	0.0625905	0.0666747	0.0912014
R-HSA-446199	Synthesis of Dolichyl-phosphate	-0.0304829	-0.126016	-0.00632386
R-HSA-429593	Inositol transporters	0.142696	0.199198	0.0755076
R-HSA-426117	Cation-coupled Chloride cotransporters	0.109667	0.0583443	0.129491
R-HSA-75064	mRNA Editing: A to I Conversion	0.304372	0.299823	0.236702
R-HSA-75102	C6 deamination of adenosine	0.304372	0.299823	0.236702
R-HSA-77042	Formation of editosomes by ADAR proteins	0.304372	0.299823	0.236702
R-HSA-3065676	SUMO is conjugated to E1 (UBA2:SAE1)	0.0702313	0.0699827	0.0516596
R-HSA-3065678	SUMO is transferred from E1 to E2 (UBE2I, UBC9)	0.062404	0.0619283	0.0378685
R-HSA-3065679	SUMO is proteolytically processed	0.0701557	0.0664291	0.0501652
R-HSA-3215018	Processing and activation of SUMO	0.0626649	0.0593365	0.0371833
R-HSA-111452	Activation and oligomerization of BAK protein	0.216981	0.203356	0.193854
R-HSA-114294	Activation, translocation and oligomerization of BAX	0.185161	0.193726	0.184226
R-HSA-8943723	Regulation of PTEN mRNA translation	0.162159	0.16548	0.124333
R-HSA-727802	Transport of nucleotide sugars	0.100157	0.112629	0.145363
R-HSA-444411	Rhesus glycoproteins mediate ammonium transport.	0.130816	0.179487	0.110514
R-HSA-9026395	Biosynthesis of DHA-derived sulfido conjugates	0.131924	0.127567	0.179126
R-HSA-9026762	Biosynthesis of maresin conjugates in tissue regeneration (MCTR)	0.131924	0.127567	0.179126
R-HSA-888568	GABA synthesis	-0.00968866	-0.008064	0.0594734
R-HSA-429958	mRNA decay by 3' to 5' exoribonuclease	0.0837276	0.0839686	0.0709712
R-HSA-9603505	NTRK3 as a dependence receptor	0.108609	0.145804	0.126447
R-HSA-177135	Conjugation of benzoate with glycine	-0.104826	-0.0594667	-0.0936289
R-HSA-177162	Conjugation of phenylacetate with glutamine	-0.472287	-0.410974	-0.470764
R-HSA-975574	Reactions specific to the hybrid N-glycan synthesis pathway	-0.00317669	0.00322478	-0.0926765
R-HSA-9667769	Acetylcholine inhibits contraction of outer hair cells	-0.233503	-0.338115	-0.298016
R-HSA-198765	Signalling to ERK5	0.188899	0.18862	0.21241
R-HSA-433137	Sodium-coupled sulphate, di- and tri-carboxylate transporters	0.0772601	0.0559377	0.0625151
R-HSA-391906	Leukotriene receptors	-0.111916	-0.125892	-0.0987867
R-HSA-435354	Zinc transporters	0.0773602	0.0793011	0.102957
R-HSA-442380	Zinc influx into cells by the SLC39 gene family	0.10152	0.084771	0.0911212
R-HSA-8951911	RUNX3 regulates RUNX1-mediated transcription	0.180731	0.151003	0.159374
R-HSA-1606341	IRF3 mediated activation of type 1 IFN	0.103401	0.0806735	0.0707396
R-HSA-428643	Organic anion transporters	-0.075073	-0.051666	-0.0735627
R-HSA-71737	Pyrophosphate hydrolysis	0.478581	0.420617	0.479393
R-HSA-9026766	Biosynthesis of protectin and resolvin conjugates in tissue regeneration (PCTR and RCTR)	0.107161	0.0883239	0.136708
R-HSA-5263617	Metabolism of ingested MeSeO2H into MeSeH	0.350059	0.359903	0.437179
R-HSA-428559	Proton-coupled neutral amino acid transporters	0.160605	0.17729	0.163544
R-HSA-373756	SDK interactions	-0.371488	-0.304771	-0.194963
R-HSA-9640463	Wax biosynthesis	0.158205	0.114286	-0.00251285
R-HSA-6793080	rRNA modification in the mitochondrion	0.11121	0.106636	0.118681
R-HSA-112122	ALKBH2 mediated reversal of alkylation damage	-0.00550144	0.0418111	0.0793999
R-HSA-73943	Reversal of alkylation damage by DNA dioxygenases	0.0202456	0.0206118	-0.0108324
R-HSA-435368	Zinc efflux and compartmentalization by the SLC30 family	0.0733032	0.0825842	0.105578
R-HSA-5576894	Phase 1 - inactivation of fast Na+ channels	0.26532	0.267301	0.242592
R-HSA-141334	PAOs oxidise polyamines to amines	0.0334484	-0.139326	0.182875
R-HSA-6814848	Glycerophospholipid catabolism	-0.00608806	-0.0967862	0.0121563
R-HSA-880009	Interconversion of 2-oxoglutarate and 2-hydroxyglutarate	-0.327781	-0.308009	-0.207263
R-HSA-6806664	Metabolism of vitamin K	0.0278171	0.0539469	0.118065
R-HSA-426048	Arachidonate production from DAG	0.119945	0.0774274	0.0761315
R-HSA-112126	ALKBH3 mediated reversal of alkylation damage	0.0551354	0.0357168	0.0286439
R-HSA-426496	Post-transcriptional silencing by small RNAs	0.183638	0.193567	0.164954
R-HSA-8948700	Competing endogenous RNAs (ceRNAs) regulate PTEN translation	0.202351	0.199644	0.176326
R-HSA-1855191	Synthesis of IPs in the nucleus	0.150562	0.0947744	0.151508
R-HSA-9636003	NEIL3-mediated resolution of ICLs	-0.487209	-0.458887	-0.271089
R-HSA-9014826	Interleukin-36 pathway	0.0109537	0.0343365	-0.029613
R-HSA-351143	Agmatine biosynthesis	-0.202321	-0.291123	-0.167432
R-HSA-163316	Mitochondrial transcription termination	-0.179179	-0.111513	-0.151472
R-HSA-1483152	Hydrolysis of LPE	0.0465081	0.131432	0.0207412
R-HSA-1483076	Synthesis of CL	0.0237032	-0.331388	0.101766
R-HSA-1855231	Synthesis of IPs in the ER lumen	-0.110463	-0.140623	-0.143106
