# Supplementary material for: Integrating microarray-based spatial transcriptomics and single-cell RNA-sequencing reveals tissue architecture in oesophageal squamous cell carcinoma
Source: Research Square preprint supplement (doi:10.21203/rs.3.rs-1539014/v1), 2022-04-14
Supplement: Supplementary file 3 [file 79f5f605efde0a023dc7609e.xlsx]

## Sheet: Neutrophils
Table S9 Function enrichment results of differentially expressed genes in stroma region 1 versus cancer stroma 2.
UP				Down
pathway_term	rich_factor	qvalue	gene_number	pathway_term	rich_factor	qvalue	gene_number
Oxidative phosphorylation	36.2137	2.68e-11	8	ECM-receptor interaction	23.176	3.89e-11	11
Parkinson's disease	34.3768	4.1e-11	8	Focal adhesion	11.0372	2.1e-08	12
Alzheimer's disease	14.4634	0.000886	4	Amoebiasis	13.4218	6.9e-06	8
Huntington's disease	12.9617	0.00136	4	Protein digestion and absorption	14.0929	3.49e-05	7
Cardiac muscle contraction	23.72	0.0018	3	PI3K-Akt signaling pathway	6.07664	6.56e-05	11
Non-alcoholic fatty liver disease (NAFLD)	11.7039	0.0143	3	Platelet activation	10.3964	0.000276	7
Protein processing in endoplasmic reticulum	7.85431	0.204	2	Dilated cardiomyopathy	10.9153	0.00629	5
Acute myeloid leukemia	10.9815	0.7	1	Hypertrophic cardiomyopathy (HCM)	9.29202	0.0642	4
				Regulation of actin cytoskeleton	4.46292	0.368	5
				Phagosome	4.76828	0.72	4
				Proteoglycans in cancer	3.87582	1	4
				Vascular smooth muscle contraction	4.64601	1	3
				MicroRNAs in cancer	4.08709	1	3
				Adrenergic signaling in cardiomyocytes	3.88274	1	3
				Glycolysis / Gluconeogenesis	5.49074	1	2
				Arrhythmogenic right ventricular cardiomyopathy...	5.32925	1	2
				Ubiquinone and other terpenoid-quinone biosynth...	18.1194	1	1
				Antigen processing and presentation	5.17698	1	2
				Biosynthesis of amino acids	4.83185	1	2
				Complement and coagulation cascades	4.83185	1	2
