# Supplementary material for: Integrating microarray-based spatial transcriptomics and single-cell RNA-sequencing reveals tissue architecture in oesophageal squamous cell carcinoma
Source: Research Square preprint supplement (doi:10.21203/rs.3.rs-1539014/v1), 2022-04-14
Supplement: Supplementary file 4 [file 9c44ce19ca319d13fef9b9fc.xlsx]

## Sheet: Neutrophils
Table S8 Function enrichment results of differentially expressed genes in cancer region 1 versus cancer region 2.
UP				Down
pathway_term	rich_factor	qvalue	gene_number	pathway_term	rich_factor	qvalue	gene_number
Metabolism of xenobiotics by cytochrome P450	10.5125	0.000103544	8	Ribosome	7.00429	0.00482556	7
Chemical carcinogenesis	8.28994	0.00265758	7	Glutathione metabolism	8.7911	0.093958	4
Drug metabolism - cytochrome P450	7.26716	0.0834967	5	Carbon metabolism	5.91709	0.131629	5
Salivary secretion	5.51302	0.291719	5	Glycolysis / Gluconeogenesis	7.45912	0.173661	4
MicroRNAs in cancer	4.32751	0.359123	6	Biosynthesis of amino acids	6.56402	0.277534	4
Glutathione metabolism	6.85189	0.380131	4	Phenylalanine metabolism	13.6751	0.820747	2
Arachidonic acid metabolism	5.56095	0.808637	4	Retinol metabolism	5.68041	1	3
ECM-receptor interaction	4.4617	1	4	Complement and coagulation cascades	4.92302	1	3
Steroid hormone biosynthesis	4.87762	1	3	Tyrosine metabolism	7.03288	1	2
Glycolysis / Gluconeogenesis	4.36029	1	3	HIF-1 signaling pathway	3.80646	1	3
Arrhythmogenic right ventricular cardiomyopathy...	4.23205	1	3	Ubiquinone and other terpenoid-quinone biosynth...	12.3075	1	1
Cardiac muscle contraction	3.83706	1	3	Staphylococcus aureus infection	4.24398	1	2
Oxidative phosphorylation	2.92905	1	4	Drug metabolism - cytochrome P450	3.72956	1	2
Tyrosine metabolism	5.48151	1	2	Central carbon metabolism in cancer	3.61987	1	2
Parkinson's disease	2.78048	1	4	Antigen processing and presentation	3.51644	1	2
Hematopoietic cell lineage	3.34627	1	3	Pathogenic Escherichia coli infection	8.20503	1	1
Aldosterone-regulated sodium reabsorption	4.91931	1	2	Metabolism of xenobiotics by cytochrome P450	3.37193	1	2
Non-alcoholic fatty liver disease (NAFLD)	2.52438	1	4	Protein processing in endoplasmic reticulum	2.44521	1	3
ABC transporters	4.2634	1	2	RNA degradation	3.23883	1	2
cGMP-PKG signaling pathway	2.41324	1	4	GABAergic synapse	3.23883	1	2
